# Supplementary material
Source: PubMed Central journal article supplement (PMC9399863)
Supplement: jama-e2213416-s002.pdf [file jama-e2213416-s002.pdf]

1 **SUPPLEMENT 2. Statistical Analysis Plan for “Effect of aspirin vs enoxaparin on**  
2 **symptomatic venous thromboembolism in patients undergoing hip or knee arthroplasty:**  
3 **the CRISTAL randomized trial”**

4

5

6

7 This trial statistical analysis plan has been provided to give readers additional information  
8 about the authors’ work.

9

10 **TABLE OF CONTENTS**

11

12

13 This supplement contains the following items:

14

15

16 i. Initial Statistical Analysis Plan Pages 3 – 26

17

18 ii. Final Statistical Analysis Plan Pages 27 – 51

19

20 iii. Summary of Changes Pages 52 – 54

21

22

23 **STATISTICAL ANALYSIS PLAN (INITIAL): 14 May 2021**

24

25 **TITLE PAGE**

26

27 **Study Title**

28 CRISTAL (A cluster-randomised, crossover, non-inferiority trial of aspirin compared to low  
29 molecular weight heparin for venous thromboembolism prophylaxis in hip or knee  
30 arthroplasty, a registry nested study): statistical analysis plan

31

32

33 **Corresponding Author:**

34 Dr Verinder Singh Sidhu (author)

35 Postal Address: Whitlam Orthopaedic Research Centre, Level 1, The Ingham Institute for  
36 Applied Medical Research, 1 Campbell Street, Liverpool, NSW, 2170

37 Email address: [Verinder.s.sidhu@gmail.com](mailto:Verinder.s.sidhu@gmail.com)

38 Phone: +61 422 167 435

39 Fax Number: +61 2 8738 3850

40

41 **Co-Authors**

42 2. Dr Thu-Lan Kelly (senior statistician)

43 Affiliation: Clinical and Health Sciences, Quality Use of Medicines Pharmacy Research  
44 Centre, University of South Australia, Adelaide, South Australia, Australia

45 3. Dr Nicole Pratt (senior statistician)

46 Affiliation: Clinical and Health Sciences, Quality Use of Medicines Pharmacy Research  
47 Centre, University of South Australia, Adelaide, South Australia, Australia

48 4. Professor Steven Graves

49 Affiliation: Australian Orthopaedic Association National Joint Replacement Registry,  
50 Adelaide, South Australia, Australia

51 5. Professor Rachelle Buchbinder

52 Affiliations:

53 i. Department of Epidemiology and Preventive Medicine, Monash  
54 University School of Public Health, Melbourne, Victoria, Australia

55 ii. Monash Department of Clinical Epidemiology, Cabrini Institute,  
56 Melbourne, Victoria, Australia

57 6. Associate Professor Justine Naylor

58 Affiliation: Whitlam Orthopaedic Research Centre, Ingham Institute for Applied  
59 Medical Research, South West Sydney Clinical School, The University of New South  
60 Wales Sydney, Sydney, NSW, Australia

61 7. Professor Richard de Steiger

62 Affiliation: Department of Surgery, Epworth Healthcare, University of Melbourne,  
63 Melbourne, Victoria, Australia

64 8. Associate Professor Ilana Ackerman

- 65 Affiliation: Department of Epidemiology and Preventive Medicine, Monash  
66 University School of Public Health and Preventive Medicine, Melbourne, Victoria,  
67 Australia
- 68 9. Associate Professor Sam Adie  
69 Affiliation: St. George and Sutherland Clinical School, The University of New South  
70 Wales Sydney, Sydney, NSW, Australia
- 71 10. Ms Michelle Lorimer  
72 Affiliation: South Australian Health and Medical Research Institute, Adelaide, South  
73 Australia, Australia
- 74 11. Mrs Durga Bastiras  
75 Affiliation: Australian Orthopaedic Association National Joint Replacement Registry,  
76 Adelaide, South Australia, Australia
- 77 12. Ms Kara Cashman  
78 Affiliation: South Australian Health and Medical Research Institute, Adelaide, South  
79 Australia, Australia
- 80 13. Professor Ian Harris (chief investigator)  
81 Affiliations:
- 82 i. Whitlam Orthopaedic Research Centre, Ingham Institute for Applied  
83 Medical Research, South West Sydney Clinical School, The University  
84 of New South Wales Sydney, Sydney, NSW, Australia
- 85 ii. Institute of Musculoskeletal Health, School of Public Health, The  
86 University of Sydney, Sydney, NSW, Australia  
87

88 **ABSTRACT**

89

90 **Background:**

91 This *a priori* statistical analysis plan describes the analysis for CRISTAL .

92

93 **Methods:**

94 CRISTAL (cluster-randomised, crossover, non-inferiority trial of aspirin compared to low  
95 molecular weight heparin for venous thromboembolism prophylaxis in hip or knee  
96 arthroplasty, a registry nested study) aims to determine whether aspirin is non-inferior to  
97 low molecular weight heparin (LMWH) in preventing symptomatic venous  
98 thromboembolism (VTE) following hip arthroplasty (HA) or knee arthroplasty (KA). The study  
99 is nested within the Australian Orthopaedic Association National Joint Replacement  
100 Registry. The trial was commenced in April 2019 and after an unplanned interim analysis,  
101 recruitment was stopped (December 2020), as the stopping rule was met for the primary  
102 outcome.

103

104 The clusters comprised hospitals performing > 250 HA and/or KA procedures per annum,  
105 whereby all adults (> 18 years) undergoing HA or KA were recruited. Each hospital was  
106 randomised to commence with aspirin, orally, 85-150mg daily or LMWH (enoxaparin),  
107 40mg, subcutaneously, daily within 24 hours postoperatively, for 35 days after HA and 14  
108 days after KA. Crossover was planned once the registration target was met for the first arm.

109

110 The primary end point is symptomatic VTE within 90 days. Secondary outcomes include  
111 readmission, reoperation, major bleeding and death within 90 days, and reoperation and  
112 patient-reported pain, function and health status at 6 months.

113

114 The main analyses will focus on the primary and secondary outcomes for patients  
115 undergoing elective primary total HA and KA for osteoarthritis. The analysis will use an  
116 intention-to-treat approach with cluster summary methods to compare treatment arms. As  
117 the trial stopped early, analyses will account for incomplete cluster crossover and unequal  
118 cluster sizes.

119

120 **Conclusions:**

121 This paper provides a detailed statistical analysis plan for CRISTAL.

122

123 **Trial registration:** Australian and New Zealand Clinical Trials Registry, ID:  
124 ACTRN12618001879257. Registered on 19/11/2018.

125

126

127 **Key Words**

128 Venous Thromboembolism, Hip Arthroplasty, Knee Arthroplasty, Aspirin, Low Molecular  
129 Weight Heparin, Statistical Analysis Plan

130

131 **MANUSCRIPT**

132

133 **Background**

134 Despite the increasing use of aspirin as a sole chemotherapeutic agent for symptomatic  
135 venous thromboembolic event (VTE) prophylaxis following hip arthroplasty (HA) and knee  
136 arthroplasty (KA) [1], there remains limited high quality comparative evidence for its safety  
137 and efficacy. The majority of studies supporting the safety and efficacy of aspirin compared  
138 to other agents, including low molecular weight heparin (LMWH), have been retrospective  
139 or non-randomised [2-11]. The only randomised trials have been underpowered or have  
140 used an alternative form of prophylaxis (e.g., LMWH or a novel oral anticoagulant (NOAC))  
141 for the immediate postoperative period following HA or KA prior to changing to aspirin for  
142 extended prophylaxis, which does not reflect the way aspirin is used in Australia [12, 13].  
143 CRISTAL is a pragmatic, multicentre cluster-randomised, crossover trial that aims to  
144 determine if aspirin is non-inferior to LMWH in the prevention of symptomatic VTE  
145 following HA and KA. It is nested within the Australian Orthopaedic Association National  
146 Joint Replacement Registry (AOANJRR).

147

148 The trial commenced in April 2019 and the estimated timeline for completion of patient  
149 registration was 24 months. However, after an unplanned interim analysis in which the trial  
150 stopping rule was met, patient registration was ceased in December 2020, resulting in  
151 incomplete crossover. This statistical analysis plan details the planned analyses for CRISTAL  
152 to facilitate transparency of data analysis. The trial protocol has previously been published  
153 [14].

154

155 **STUDY OVERVIEW**

156

157 **Ethics**

158 Ethics approval was granted from all relevant central, lead ethics committees involved and  
159 all participating hospitals, as outlined in the published trial protocol [14]. The trial is  
160 registered with the Australian New Zealand Clinical Trials Registry  
161 (ACTRN12618001879257p) and is endorsed by the Australia and New Zealand  
162 Musculoskeletal (ANZMUSC) Clinical Trials Network.

163

164 **Participating Hospitals and Patient Registration**

165 The clusters in CRISTAL comprise 31 consenting hospitals that perform greater than 250 HA  
166 and/or KA procedures per annum.

167

168 Each recruited hospital was responsible for registering patients and complying with the trial  
169 protocol. The AOANJRR routinely collects data pertaining to the procedure, patient age, sex,  
170 American Society of Anaesthesiologists (ASA) class and body mass index (BMI) and death on  
171 all patients undergoing HA and KA procedures. Patient-reported outcomes are collected  
172 through the electronic Clinical Trials Platform, which requires pre-operative registration of  
173 the patient onto the electronic system. All adult (age 18 and older) patients undergoing HA  
174 or KA were eligible for registration into the study and eligible to receive the allocated study  
175 drug, except for those who were already on long-term anticoagulation (specifically a NOAC,  
176 warfarin or dual antiplatelet therapy (DAPT)) and those with a medical contraindication to

177 either drug, e.g., an allergy or a medical comorbidity such as thrombophilia that precluded  
178 treatment with the study drug.

179

180 Patients who were not registered in the electronic Clinical Trials Platform will be included in  
181 secondary analyses, as procedure information, demographics and mortality were still  
182 recorded even though the primary outcome and other patient-reported outcomes were not  
183 recorded.

184

#### 185 **Intervention**

186 Each hospital (cluster) was allocated to consecutive periods of a standard protocol of LMWH  
187 and a standard protocol of aspirin as VTE prophylaxis, with the order being randomised.

188 Patients in the aspirin group received aspirin at 85-150mg once daily, orally for 35 days post  
189 HA and for 14 days post KA, commencing within 24 hours of surgery. Patients in the LMWH  
190 group received enoxaparin at 40mg once daily, subcutaneously for the same time periods,  
191 with this dose reduced to 20mg for patients who weigh less than 50kg and for patients with  
192 an estimated glomerular filtration rate (eGFR) of less than 30mL/min who are not on  
193 dialysis. Other interventions that were standard across all sites were the intra- and post-  
194 operative use of intermittent pneumatic compression (IPC) calf devices until patients are  
195 mobile, the use of compression stockings, and mobilisation offered on day 0 or day 1  
196 postoperatively.

197

#### 198 **Randomisation and allocation**

199 Study investigators have remained blinded to group allocation. Hospitals were randomised  
200 to commence with either LMWH or aspirin, in randomly permuted blocks of size four by  
201 statisticians from the South Australian Health and Medical Research Institute (SAHMRI),  
202 independent of study investigators. The randomisation sequence was generated using an  
203 online application [15] and this was provided to an unblinded data manager from SAHMRI.  
204 The hospital was then allocated to a treatment sequence by SAHMRI staff and this  
205 information was provided to the AOANJRR (independent of study investigators), with the  
206 site being informed of their allocated treatment arm the week prior to commencing initial  
207 patient registration. Hospitals were advised to crossover to the alternate treatment once  
208 the sample size for the first treatment arm was met.

209

210 For clusters who did not reach the sample size for the first arm within 18 months of  
211 commencement, crossover occurred prior to reaching the sample size so that an equal  
212 number of patients could be registered in each arm within the study timeframe.

213

#### 214 **Evaluation of adherence to the study protocol and protocol deviations**

215 At a hospital level, during the course of the trial each hospital was audited within the first  
216 month of each treatment arm to ensure they were complying with the trial protocol. The  
217 audit consisted of the first 20 patients of each treatment arm. If a site had a compliance of  
218 less than 80%, the site was educated on methods of improving protocol compliance and  
219 subsequently re-audited until compliance to the protocol was above 80%.

220

221 Hospitals were also advised to inform trial co-ordinators of patients not receiving the  
222 correct study drug or those patients who had the study drug withheld for greater than 48

223 hours due to side effects (e.g. allergy, excessive wound drainage or bleeding events). These  
224 protocol deviations were recorded using the Clinical Trials Platform.

225  
226

### 227 **Outcome variables**

228 The primary outcome of the study is symptomatic VTE within 90 days of surgery. Secondary  
229 outcomes are:

- 230 • Deep vein thrombosis (DVT) only (total, below-knee and above-knee) within 90 days
- 231 • Pulmonary embolism (PE) only within 90 days
- 232 • Readmission related to the original surgery or associated treatment (including  
233 bleeding and VTE-related) within 90 days
- 234 • Reoperation on the same joint within 90 days and within 6 months of surgery
- 235 • Major bleeding events within 90 days defined as bleeding events resulting in  
236 readmission, reoperation or death
- 237 • Death within 90 days
- 238 • Change in patient-reported pain, function and health status measures as measured  
239 by the Oxford Hip Score (OHS), Oxford Knee Score (OKS), EQ-5D score and the EQ-  
240 VAS from baseline to 6 months postoperatively

241  
242

243 Outcome and demographic data were collected preoperatively (demographics, patient  
244 reported pain, function and health status) and at 90 days and 6 months postoperatively.  
245 Data for all primary and secondary outcomes are patient-reported (except for death). All  
246 patients who responded 'yes' to having experienced a VTE or a secondary operation within  
247 6 months had this result verified by AOANJRR staff through contact with treating doctors  
248 and hospitals. A random audit of 200 patients who did not report a VTE event was  
249 undertaken to detect the false negative reporting rate. All data collected for registered  
250 patients specific to CRISTAL have been outlined in the published protocol [14]. Mortality  
251 data were collected through linkage between the AOANJRR and the National Death Index.

252

253 In the published protocol [14], mortality was to be measured at 90 days and 6 months. Due  
254 to the lack of sensitivity in measuring VTE-related mortality at 6 months, and due to the lag  
255 in data availability for mortality, we will only analyse mortality at 90 days [16].

256  
257

### 258 **Power and sample size**

259 For the sample size calculation in CRISTAL, we used an estimated overall event rate of 2%  
260 (based on the current available literature) [17, 18], a non-inferiority margin of 1% (based on  
261 clinician opinion and a recent randomised controlled trial) [12], i.e., an event rate of 2.5%  
262 for aspirin and 1.5% for LMWH, a power of 90% and a one-sided significance level of 0.025.  
263 For an individual randomised trial, this yields a sample size of 4,117 per treatment group or  
264 a total of 8,234 patients. For a cluster-randomised crossover trial with an intracluster  
265 correlation of 0.01, an interperiod correlation of 0.008 and 31 clusters, the required sample  
266 size is 11,160 patients [19, 20]. From each cluster and from each arm, we aimed to register  
267 251 patients eligible for the primary objective of the study [14]. This provided a total of  
268 15,562 patients and allows for a 27% loss to follow-up.



269 **STATISTICAL ANALYSIS PLAN**

270 **Patient Populations and Subgroups for Analyses**

271 The total patient population for CRISTAL comprises all patients undergoing HA or KA at  
272 participating institutions over the duration of the study, regardless of whether these  
273 patients were registered or eligible to receive the study drug (defined as population 5, see  
274 Figure 1).

275

276 Within this total population, the following populations will be used to form the basis of the  
277 analyses:

- 278 • Registered patients undergoing any form of HA or KA (including partial or revision  
279 surgery, for any indication) regardless of eligibility to receive the study drug  
280 (population 4)
- 281 • Registered patients undergoing any form of HA or KA (including partial or revision  
282 surgery, for any indication) who were eligible to receive the study drug (population  
283 3)
- 284 • Registered patients undergoing elective primary THA or TKA (for any indication) who  
285 were eligible to receive the study drug (population 2)
- 286 • All registered patients undergoing elective primary THA or TKA for a recorded  
287 diagnosis of osteoarthritis (OA) who were eligible to receive the study drug  
288 (population 1)

289

290 These populations are represented diagrammatically in Figure 1.

291

292

293

294 **Figure 1.** Patient populations within CRISTAL

295

296

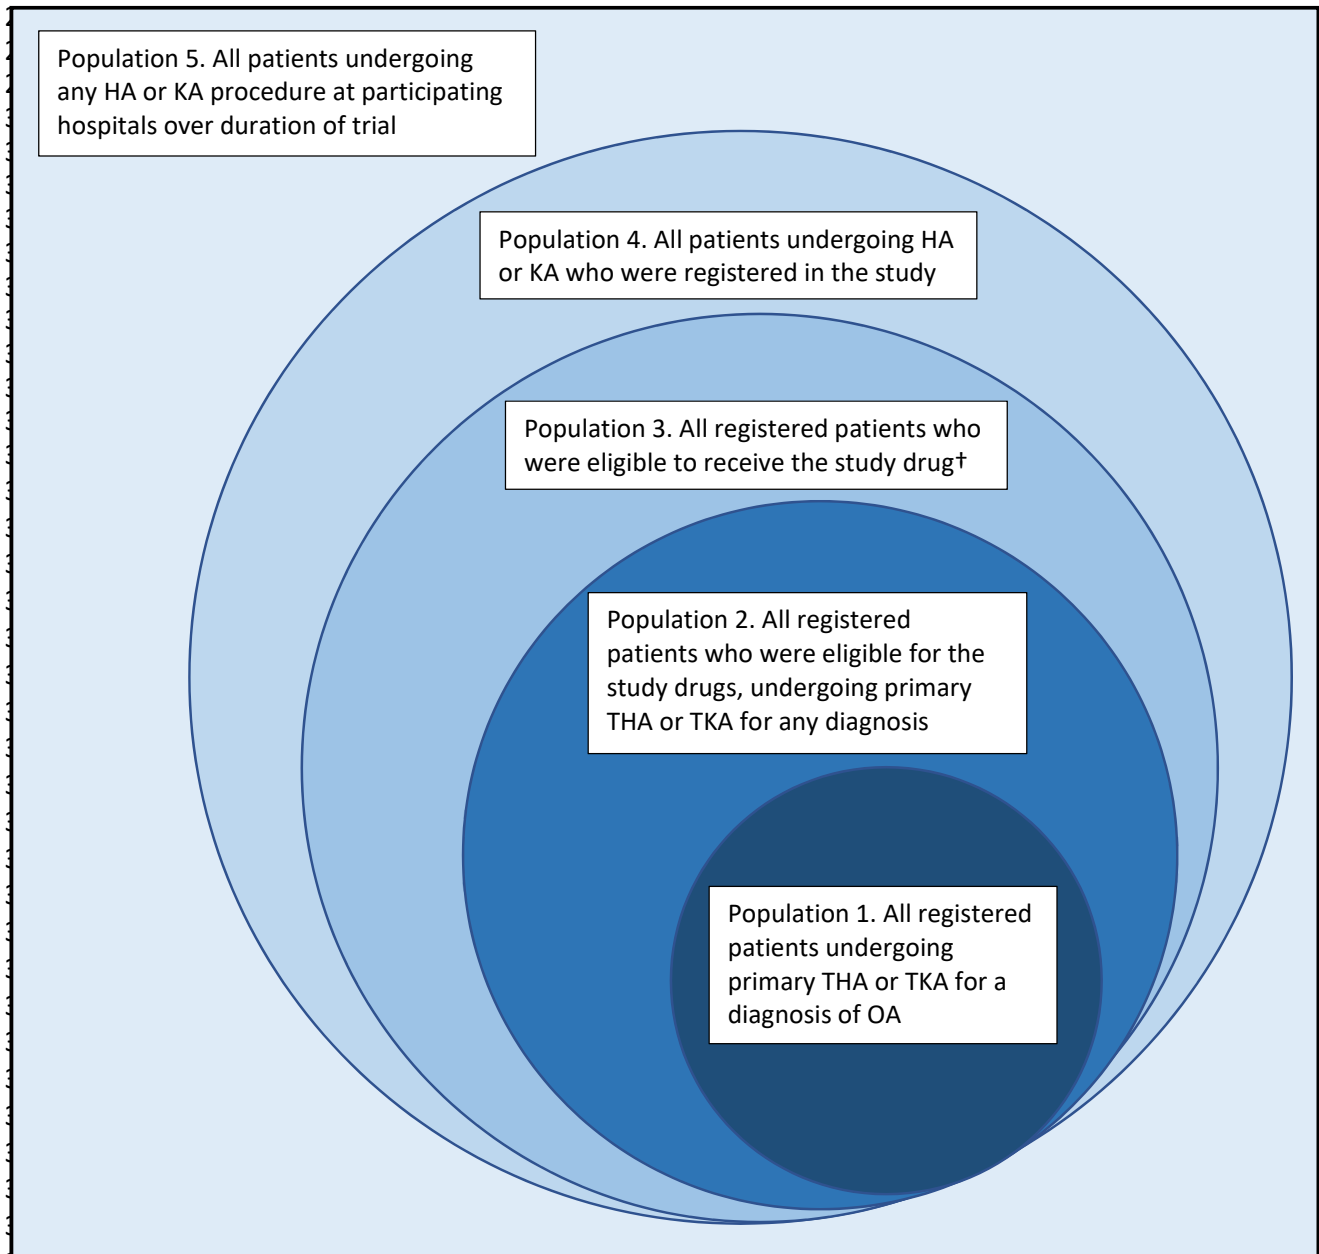

332

333

334

335

336 **Legend:**

337 Abbreviations: *HA* hip arthroplasty, *KA* knee arthroplasty, *THA* total hip arthroplasty, *TKA* total knee arthroplasty, *OA*

338 osteoarthritis

339 † Study drug excluded for patients who already on long-term anticoagulation (specifically a novel oral anticoagulant –

340 NOAC, warfarin or dual antiplatelet therapy – DAPT) and those who have a medical contraindication

341

342 Each outcome (primary and secondary) will be assessed for populations 1, 2, 3 and 4 listed  
343 in Figure 1. Mortality will be assessed for all populations (including population 5). The  
344 primary objective of the study as outlined in the published protocol [14], was the analysis of  
345 population 1 only (registered patients undergoing primary THA or TKA for a diagnosis of OA  
346 who are eligible to receive the study drug), as this was the focus of the sample size  
347 calculation. This population will remain the focus of the main analyses.

348

349 Population 1 was chosen as the focus of the main analysis as these patients represent the  
350 majority of patients undergoing HA or KA procedures and there are known differences in  
351 outcomes and co-morbidities with other diagnoses (e.g., fracture, tumour), which could  
352 confound the primary outcome [21].

353

354 For the primary end point of VTE, the following subgroup analyses will be conducted within  
355 the corresponding populations listed:

356

- Type of joint replacement: primary THA compared to primary TKA – population 1
- Bilateral arthroplasty: patients undergoing simultaneous bilateral arthroplasty compared to those who are not – population 1
- Revision arthroplasty: patients undergoing revision hip or knee arthroplasty compared to those undergoing primary arthroplasty – population 3
- Prior history of VTE: patients with a prior history of VTE compared to those without – population 1

362

363

364

365

### **Analysis principles**

366

367

368

369

370

371

372

373

374

375

376

377

378

379

380

381

382

383

### **Interim analysis**

384

385

386

387

An interim analysis was not initially planned, as both treatments are considered standard practice for VTE prophylaxis in Australia and the trial is investigating an adverse event as the primary outcome. However, due to concerns of an increased adverse event rate (symptomatic VTE and death) in one of the prophylaxis groups, a Data Safety Monitoring

388 Board (DSMB) was convened one year into patient recruitment. The DSMB consisted of an  
389 orthopaedic surgeon, a haematologist and a statistician, all independent of the trial.

390

391 The DSMB were advised by the Trial Management Committee (TMC) to conduct an interim  
392 analysis. In conjunction with the DSMB (prior to the interim analysis), the TMC applied the  
393 Haybittle-Peto stopping rule of a two-sided significance of 0.001 for the primary outcome in  
394 the population 1 [22, 23]. This stopping rule was chosen as it does not require adjustment of  
395 the significance threshold for the final analysis and allows further interim analyses using the  
396 same threshold (if required).

397

398 After the first interim analysis (in September 2020), the DSMB recommended continuing the  
399 trial and performing a second interim analysis in November 2020. After reviewing the  
400 second interim analysis, the DSMB recommended ceasing patient recruitment as the  
401 stopping rule had been met. The study ceased recruiting patients in December 2020 and  
402 sites reverted to their usual VTE prophylaxis pathways.

403

#### 404 ***Methods used for Interim Analyses***

405 Interim analyses were conducted for VTE and mortality within 90 days for population 1. To  
406 account for unequal cluster sizes, incomplete crossover or clusters which had not yet  
407 crossed over, a composite analysis was designed. For clusters which had crossed over,  
408 including with partial completion of the second period, the cluster weighted estimator  
409 intended for the primary outcome was used. Clusters which had not crossed over were  
410 analysed using the cluster period summaries, weighted by cluster size, in a parallel design  
411 approach. Estimates for the two approaches were combined using inverse variance weights  
412 to provide a final estimate. Confidence intervals were constructed using the Haybittle-Peto  
413 boundary of 0.001.

414

#### 415 **Data integrity**

416 Integrity of data will be checked prior to conducting the final analysis. The data set will be  
417 checked for errors, omissions and double data entry. These will be resolved prior to  
418 commencing the analysis in consultation with the data management plan [14].

419

#### 420 **Blinding**

421 The DSMB were blinded to treatment allocation (groups in the interim analyses were  
422 labelled A and B). All researchers involved in the preparation of this analysis plan will have  
423 no access to trial data broken down by treatment allocation for the final statistical analysis.  
424 Once data integrity checks have been conducted, a blind review to quantify missing data of  
425 the entire dataset will be conducted and any final amendments to the statistical analysis  
426 plan will be made before the database is locked. During analysis and interpretation, group  
427 allocation will be masked by dummy group names and the true allocation will be unmasked  
428 only after the final statistical report has been completed and interpretation has been agreed  
429 to by the writing group and minuted.

430

#### 431 **Methods for handling missing data**

432 Multiple imputation using chained equations will be used to account for missing data, using  
433 auxiliary variables gathered from routine AOANJRR data (including age, sex, baseline health,  
434 pain and function, diagnosis and surgical factors). If there is any possibility of bias due to

435 perfect prediction of rare outcomes such as VTE [24] or imputing values out of range for  
436 bounded variables such as pain scores or EQ5D [25], imputation will not be performed.  
437 Since the most likely reason for loss to follow-up is difficulty in contacting patients  
438 postoperatively (rather than association with treatment assignment or outcome), missing  
439 data will be assumed to be missing at random.

440

441

#### 442 **Trial profile and baseline characteristics**

443 The flow of participating hospitals through the study and participating patients will be  
444 reported in line with the Consolidated Standards of Reporting Trials (CONSORT) statement  
445 (Figures 2 and 3).

446

447 The number of patients registered for population 1 (the population used for the sample size  
448 calculation) by each participating hospital and the overall registration rate of each hospital  
449 will be presented as outlined in Table 1. The overall registration rate describes the number  
450 of registered patients undergoing any HA or KA procedure (population 4) divided by the  
451 number of patients who underwent any HA or KA procedure over the duration of the trial at  
452 participating hospitals (regardless of whether they were registered – population 5). Hospital  
453 names will remain anonymous.

454

455 Descriptive statistics of baseline patient characteristics for all registered patients eligible to  
456 receive the study drug (population 3) will be presented by prophylaxis group (Table 2).

457

458  
459  
460  
461

**Figure 2.** Flowsheet of participating hospitals

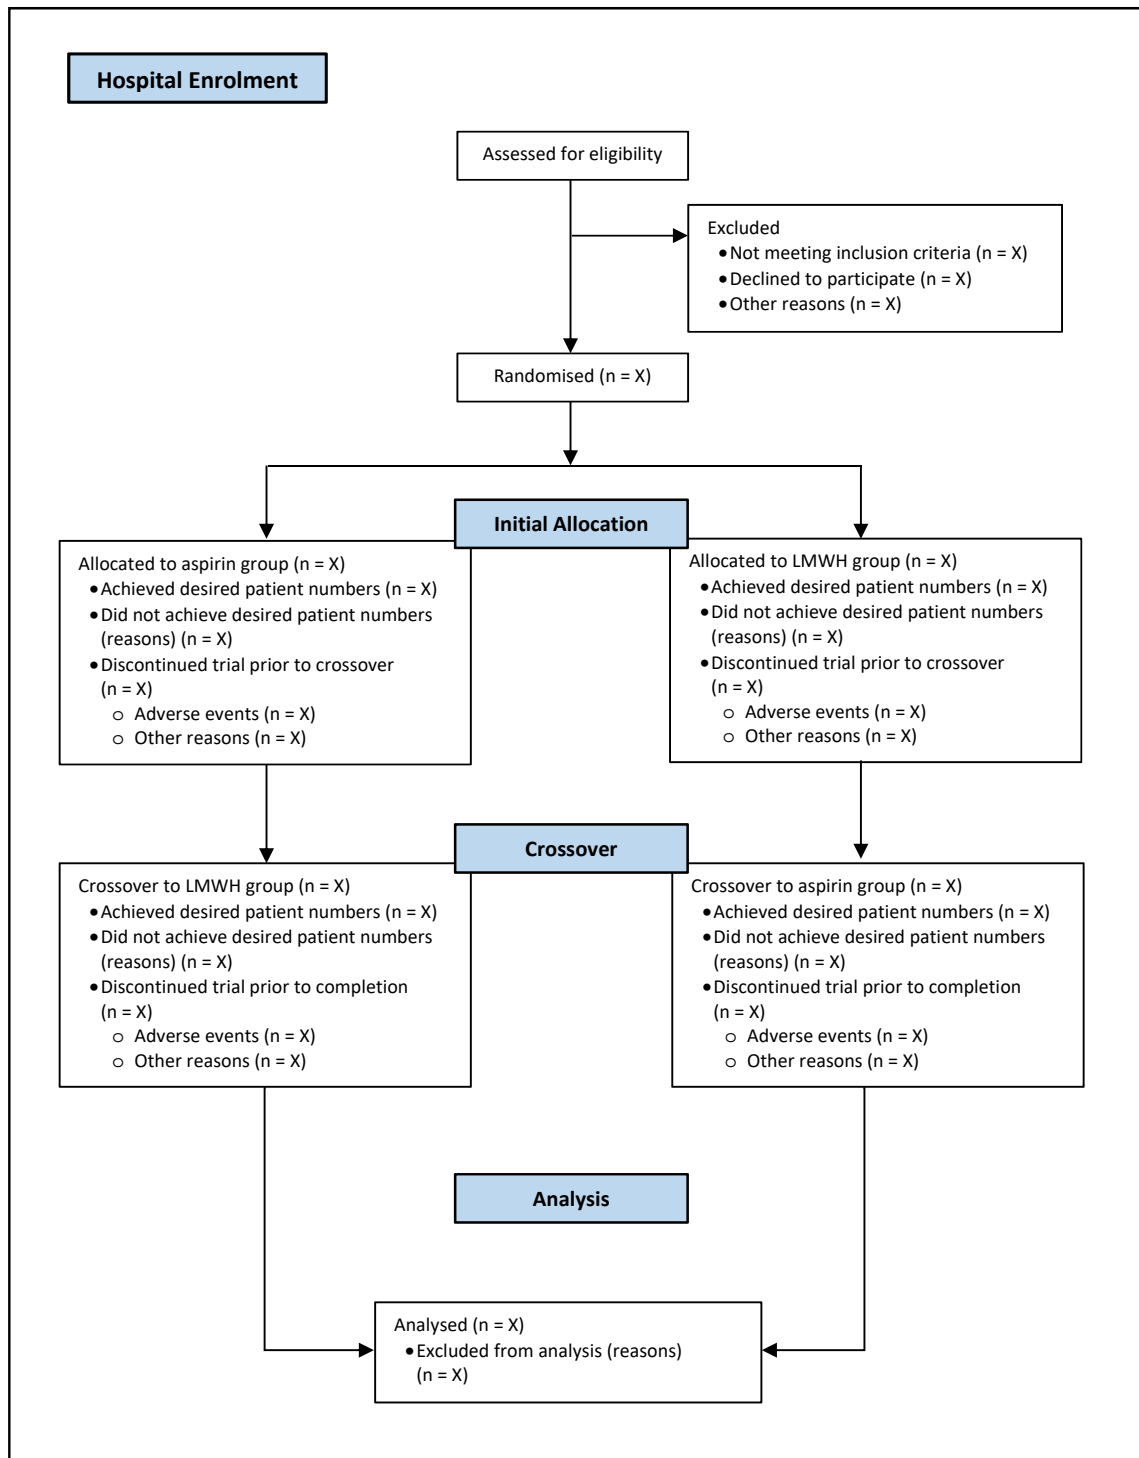

462 **Figure 3.** Flowsheet of patients within population 1<sup>†</sup>

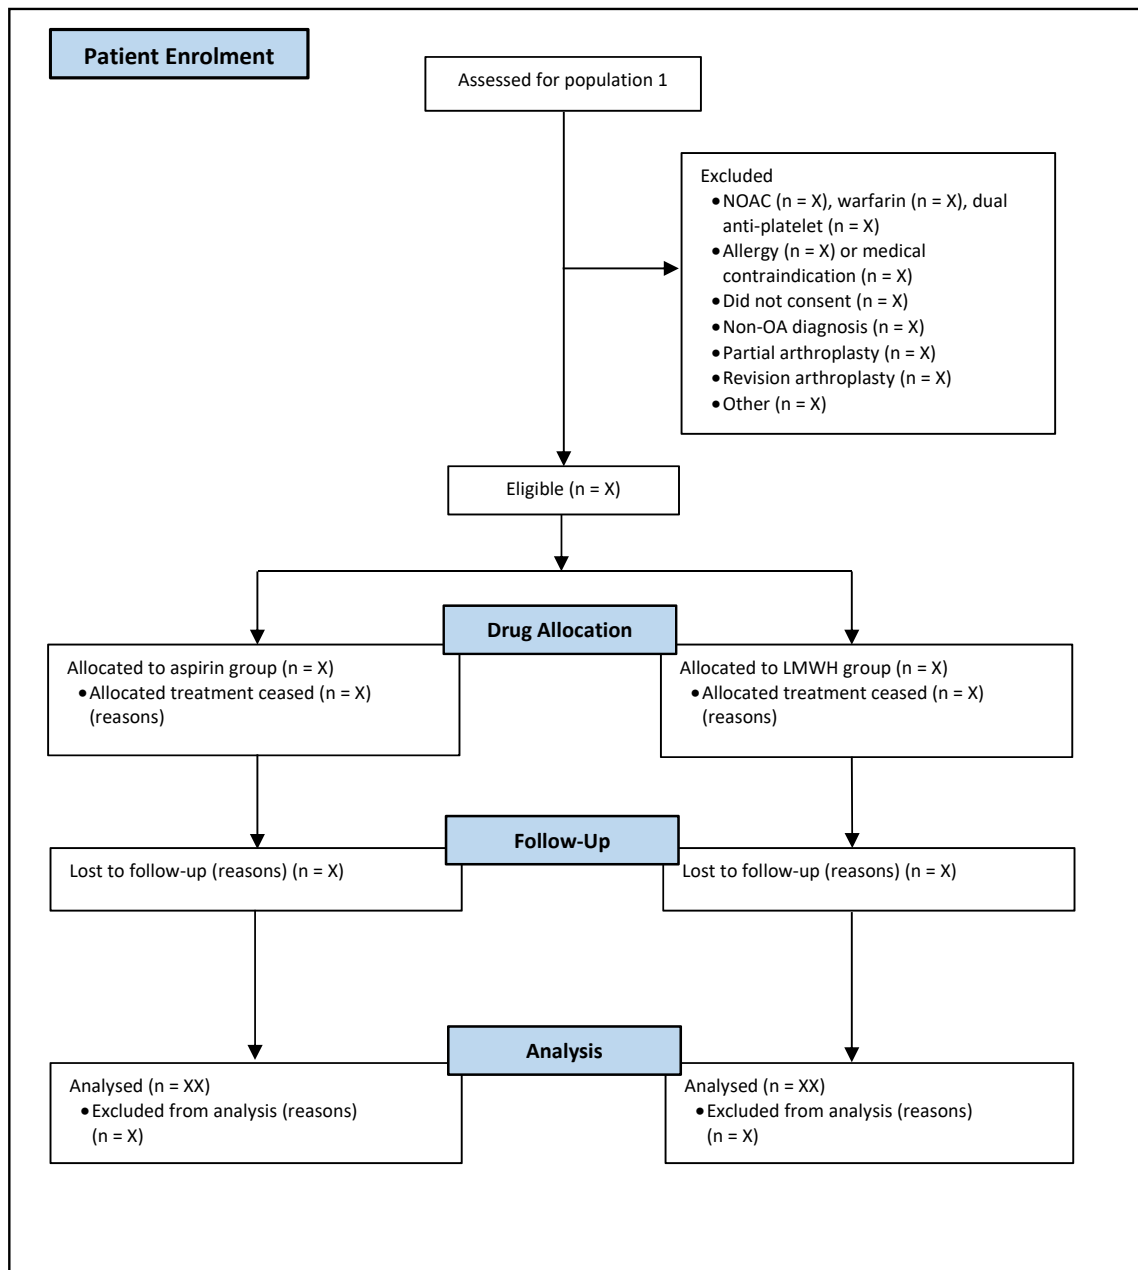

499  
500  
501  
502 <sup>†</sup> Population 1 refers to registered patients undergoing primary THA or TKA for a diagnosis of OA, who are eligible to receive the study  
503 drug

508 **Table 1.** Number of registered patients for population 1<sup>†</sup> by treatment group and overall  
 509 registration rate for each participating hospital  
 510

| Hospital     | Sequence Allocation? | LMWH Group (Population 1) | Aspirin Group (Population 1) | Overall Registration Rate (combined for both groups) |
|--------------|----------------------|---------------------------|------------------------------|------------------------------------------------------|
| 1            |                      | n                         | n                            | %                                                    |
| 2            |                      | n                         | n                            | %                                                    |
| 3            |                      | n                         | n                            | %                                                    |
| 4            |                      | n                         | n                            | %                                                    |
| 5            |                      | n                         | n                            | %                                                    |
| 6            |                      | n                         | n                            | %                                                    |
| 7            |                      | n                         | n                            | %                                                    |
| 8            |                      | n                         | n                            | %                                                    |
| 9            |                      | n                         | n                            | %                                                    |
| 10           |                      | n                         | n                            | %                                                    |
| 11           |                      | n                         | n                            | %                                                    |
| 12           |                      | n                         | n                            | %                                                    |
| 13           |                      | n                         | n                            | %                                                    |
| 14           |                      | n                         | n                            | %                                                    |
| 15           |                      | n                         | n                            | %                                                    |
| 16           |                      | n                         | n                            | %                                                    |
| 17           |                      | n                         | n                            | %                                                    |
| 18           |                      | n                         | n                            | %                                                    |
| 19           |                      | n                         | n                            | %                                                    |
| 20           |                      | n                         | n                            | %                                                    |
| 21           |                      | n                         | n                            | %                                                    |
| 22           |                      | n                         | n                            | %                                                    |
| 23           |                      | n                         | n                            | %                                                    |
| 24           |                      | n                         | n                            | %                                                    |
| 25           |                      | n                         | n                            | %                                                    |
| 26           |                      | n                         | n                            | %                                                    |
| 27           |                      | n                         | n                            | %                                                    |
| 28           |                      | n                         | n                            | %                                                    |
| 29           |                      | n                         | n                            | %                                                    |
| 30           |                      | n                         | n                            | %                                                    |
| 31           |                      | n                         | n                            | %                                                    |
| <b>Total</b> |                      | <b>n</b>                  | <b>n</b>                     | <b>%</b>                                             |

511  
 512 <sup>†</sup> Population 1 refers to registered patients undergoing primary THA or TKA for a diagnosis of OA, who are eligible to receive the study  
 513 drug  
 514  
 515  
 516



517 **Table 2.** Baseline patient characteristics for all registered patients eligible to receive study  
 518 drug (population 3), according to treatment allocation  
 519

|                                 | <b>LMWH</b><br>(n = X) | <b>Aspirin</b><br>(n = X) |
|---------------------------------|------------------------|---------------------------|
| Age (years)                     | xx.x (xx.x – xx.x), n  | xx.x (xx.x – xx.x), n     |
| BMI (kg/m <sup>2</sup> )        | xx.x (xx.x – xx.x), n  | xx.x (xx.x – xx.x), n     |
| Male sex                        | n (%)                  | n (%)                     |
| ASA Grading                     |                        |                           |
| 1                               | n (%)                  | n (%)                     |
| 2                               | n (%)                  | n (%)                     |
| 3                               | n (%)                  | n (%)                     |
| 4                               | n (%)                  | n (%)                     |
| 5                               | n (%)                  | n (%)                     |
| Previous venous thromboembolism | n (%)                  | n (%)                     |
| Long term anticoagulant use     |                        |                           |
| Aspirin                         | n (%)                  | n (%)                     |
| Other single antiplatelet       | n (%)                  | n (%)                     |
| Joint replacement               |                        |                           |
| THA                             | n (%)                  | n (%)                     |
| TKA                             | n (%)                  | n (%)                     |
| Other HA                        | n (%)                  | n (%)                     |
| Other KA                        | n (%)                  | n (%)                     |
| Bilateral                       | n (%)                  | n (%)                     |
| Type of surgery                 |                        |                           |
| Primary total                   | n (%)                  | n (%)                     |
| Primary partial                 | n (%)                  | n (%)                     |
| Primary resurfacing             | n (%)                  | n (%)                     |
| Revision                        | n (%)                  | n (%)                     |
| Other                           | n (%)                  | n (%)                     |
| Indication                      |                        |                           |
| Osteoarthritis                  | n (%)                  | n (%)                     |
| Inflammatory                    | n (%)                  | n (%)                     |
| Avascular Necrosis              | n (%)                  | n (%)                     |
| Fracture                        | n (%)                  | n (%)                     |
| Other                           | n (%)                  | n (%)                     |
| Prosthesis                      |                        |                           |
| Cemented                        | n (%)                  | n (%)                     |
| Hybrid                          | n (%)                  | n (%)                     |
| Uncemented                      | n (%)                  | n (%)                     |
| Pain and Function               |                        |                           |
| Oxford Hip Score                | xx.x (xx.x – xx.x), n  | xx.x (xx.x – xx.x), n     |
| Oxford Knee Score               | xx.x (xx.x – xx.x), n  | xx.x (xx.x – xx.x), n     |
| EQ-5D                           | xx.x (xx.x – xx.x), n  | xx.x (xx.x – xx.x), n     |
| EQ-VAS                          | xx.x (xx.x – xx.x), n  | xx.x (xx.x – xx.x), n     |

Abbreviations: *BMI* body mass index, *ASA* American society of anaesthesiologists

520  
 521  
 522  
 523  
 524

525 **MAIN ANALYSES**

526

527 The main analyses will include the primary and secondary outcomes for registered patients  
528 eligible to receive the study drug undergoing THA or TKA for a diagnosis of OA (population  
529 1). In addition, the primary and secondary outcomes will be analysed for populations 2, 3  
530 and 4. Mortality will also be analysed for population 5 (see “Additional analyses” below).

531

532 For the primary outcome, the analysis will test the between-group difference of cases  
533 developing a symptomatic VTE within 90 days for non-inferiority of aspirin at a margin of  
534 1%. Cluster summary methods will be used to estimate the treatment effect using cluster  
535 level differences. These have been shown to be appropriate for cluster-randomised  
536 crossover trials with rare outcomes, and the intracluster and interperiod correlation  
537 coefficients expected in this trial. The crossover difference per cluster is the mean outcome  
538 for the intervention period minus the mean outcome for the control period. In a linear  
539 regression of cluster differences on treatment sequence, the treatment effect estimate is  
540 the intercept. To account for potential unequal cluster sizes, a cluster size weighted  
541 estimator will be used with harmonic mean weights of the number of patients in the two  
542 periods [26, 27]. Treatment effects will be presented as absolute risk differences and 95%  
543 confidence intervals will be examined to determine whether the non-inferiority margin has  
544 been met and whether superiority of one drug can be concluded. The primary outcome will  
545 be presented in Table 3 and Figure 4 will be used to demonstrate whether the non-  
546 inferiority margin has been met for the population 1 [28].

547

548 The secondary outcomes will investigate non-VTE complications (death, re-operation,  
549 readmission and major bleeding events) within 90 days, and reoperation and patient-related  
550 pain and function at 6 months (OHS, OKS, EQ-5D and EQ-VAS). Cluster summary methods  
551 will be used within an intention-to treat approach. For binary outcomes, the cluster mean  
552 per period will be the proportion of patients who had the outcome, while for continuous  
553 outcomes such as pain score, the cluster mean will be the mean outcome. Treatment  
554 effects will be presented as absolute risk differences and 95% confidence intervals to  
555 determine if one treatment is superior to the alternative. Results for the secondary  
556 outcomes in population 1 will be presented in tabular form (Table 3) and results for the  
557 primary and secondary outcomes in populations 2, 3 and 4 in Table 4.

558

559 Due to the early stopping of the trial, final analyses of the primary and secondary outcomes  
560 will use the composite method for the interim analyses with appropriate confidence  
561 intervals.

562

563 **Table 3.** Outcomes for population 1

| Outcome                                            | LMWH Allocation (n = X) | Aspirin Allocation (n = X) | Absolute Risk Difference | 95% Confidence Interval | p-value |
|----------------------------------------------------|-------------------------|----------------------------|--------------------------|-------------------------|---------|
| Any Venous thromboembolism                         | n (%)                   | n (%)                      | X                        | X - X                   |         |
| <b>Type of Venous thromboembolism</b>              |                         |                            |                          |                         |         |
| Pulmonary embolism                                 | n (%)                   | n (%)                      | X                        | X - X                   |         |
| Deep venous thrombosis                             | n (%)                   | n (%)                      | X                        | X - X                   |         |
| Both Pulmonary embolism and deep venous thrombosis | n (%)                   | n (%)                      | X                        | X - X                   |         |
| Above knee deep venous thrombosis                  | n (%)                   | n (%)                      | X                        | X - X                   |         |
| Below knee deep venous thrombosis                  | n (%)                   | n (%)                      | X                        | X - X                   |         |
| Death                                              | n (%)                   | n (%)                      | X                        | X - X                   |         |
| Re-operation (90d)                                 | n (%)                   | n (%)                      | X                        | X - X                   |         |
| Reoperation (6 months)                             | n (%)                   | n (%)                      | X                        | X - X                   |         |
| Re-admission                                       | n (%)                   | n (%)                      | X                        | X - X                   |         |
| Major Bleeding                                     | n (%)                   | n (%)                      | X                        | X - X                   |         |
| Pain and Function (median and IQR) <sup>†</sup>    |                         |                            | X                        | X - X                   |         |
| Oxford Hip Score                                   | X (X - X)               | X (X - X)                  | X                        | X - X                   |         |
| Oxford Knee Score                                  | X (X - X)               | X (X - X)                  | X                        | X - X                   |         |
| EQ-5D                                              | X (X - X)               | X (X - X)                  | X                        | X - X                   |         |
| EQ-VAS                                             | X (X - X)               | X (X - X)                  | X                        | X - X                   |         |

564  
565 <sup>†</sup> at 6 months

566  
567  
568 **Figure 4.** Between group change in overall 90-day symptomatic VTE rate and non-inferiority margin. The dotted line represents the non-inferiority margin

569  
570  
571

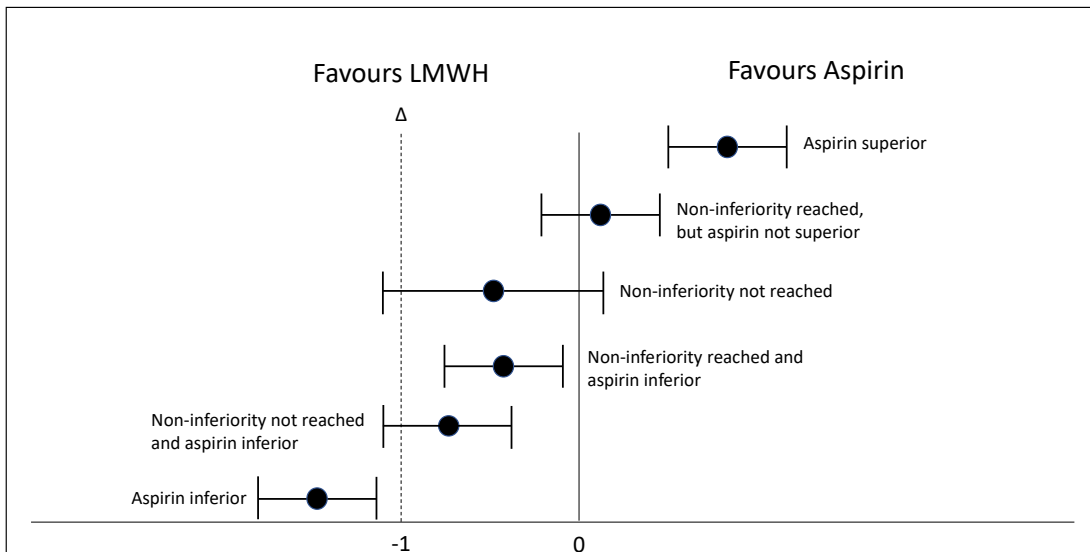

572  
573  
574

575 **Table 4.** Outcomes for populations 2, 3 and 4

| Population                                                                          | Outcome                                            | LMWH Allocation (n = X) | Aspirin Allocation (n = X) | Absolute Risk Difference | 95% Confidence Interval | p-value |
|-------------------------------------------------------------------------------------|----------------------------------------------------|-------------------------|----------------------------|--------------------------|-------------------------|---------|
| All primary THA/TKA for any diagnosis eligible to receive study drug (population 2) | <b>Any Venous thromboembolism</b>                  | n (%)                   | n (%)                      | X                        | X – X                   |         |
|                                                                                     | <b>Type of Venous thromboembolism</b>              |                         |                            |                          |                         |         |
|                                                                                     | Pulmonary embolism                                 | n (%)                   | n (%)                      | X                        | X – X                   |         |
|                                                                                     | Deep venous thrombosis                             | n (%)                   | n (%)                      | X                        | X – X                   |         |
|                                                                                     | Both Pulmonary embolism and deep venous thrombosis | n (%)                   | n (%)                      | X                        | X – X                   |         |
|                                                                                     | Above knee deep venous thrombosis                  | n (%)                   | n (%)                      | X                        | X – X                   |         |
|                                                                                     | Below knee deep venous thrombosis                  | n (%)                   | n (%)                      | X                        | X – X                   |         |
|                                                                                     | Death                                              | n (%)                   | n (%)                      | X                        | X – X                   |         |
|                                                                                     | Re-operation (90d)                                 | n (%)                   | n (%)                      | X                        | X – X                   |         |
|                                                                                     | Reoperation (6 months)                             | n (%)                   | n (%)                      | X                        | X – X                   |         |
|                                                                                     | Re-admission                                       | n (%)                   | n (%)                      | X                        | X – X                   |         |
|                                                                                     | Major Bleeding                                     | n (%)                   | n (%)                      | X                        | X – X                   |         |
|                                                                                     | Pain and Function (median and IQR) <sup>†</sup>    |                         |                            |                          |                         |         |
| Oxford Hip Score                                                                    |                                                    |                         | X                          | X – X                    |                         |         |
| Oxford Knee Score                                                                   | X (X – X)                                          | X (X – X)               | X                          | X – X                    |                         |         |
| EQ-5D                                                                               | X (X – X)                                          | X (X – X)               | X                          | X – X                    |                         |         |
| EQ-VAS                                                                              | X (X – X)                                          | X (X – X)               | X                          | X – X                    |                         |         |
| X (X – X)                                                                           | X (X – X)                                          | X (X – X)               |                            |                          |                         |         |
| All HA/KA eligible to receive study drug (population 3)                             | <b>Any Venous thromboembolism</b>                  | n (%)                   | n (%)                      | X                        | X – X                   |         |
|                                                                                     | <b>Type of Venous thromboembolism</b>              |                         |                            |                          |                         |         |
|                                                                                     | Pulmonary embolism                                 | n (%)                   | n (%)                      | X                        | X – X                   |         |
|                                                                                     | Deep venous thrombosis                             | n (%)                   | n (%)                      | X                        | X – X                   |         |
|                                                                                     | Both Pulmonary embolism and deep venous thrombosis | n (%)                   | n (%)                      | X                        | X – X                   |         |
|                                                                                     | Above knee deep venous thrombosis                  | n (%)                   | n (%)                      | X                        | X – X                   |         |
|                                                                                     | Below knee deep venous thrombosis                  | n (%)                   | n (%)                      | X                        | X – X                   |         |
|                                                                                     | Death                                              | n (%)                   | n (%)                      | X                        | X – X                   |         |
|                                                                                     | Re-operation (90d)                                 | n (%)                   | n (%)                      | X                        | X – X                   |         |
|                                                                                     | Reoperation (6 months)                             | n (%)                   | n (%)                      | X                        | X – X                   |         |
|                                                                                     | Re-admission                                       | n (%)                   | n (%)                      | X                        | X – X                   |         |
|                                                                                     | Major Bleeding                                     | n (%)                   | n (%)                      | X                        | X – X                   |         |
|                                                                                     | Pain and Function (median and IQR) <sup>†</sup>    |                         |                            |                          |                         |         |
| Oxford Hip Score                                                                    |                                                    |                         | X                          | X – X                    |                         |         |
| Oxford Knee Score                                                                   | X (X – X)                                          | X (X – X)               | X                          | X – X                    |                         |         |
| EQ-5D                                                                               | X (X – X)                                          | X (X – X)               | X                          | X – X                    |                         |         |
| EQ-VAS                                                                              | X (X – X)                                          | X (X – X)               | X                          | X – X                    |                         |         |
| X (X – X)                                                                           | X (X – X)                                          | X (X – X)               |                            |                          |                         |         |
| All HA/KA including study drug exclusion (population 4)                             | <b>Any Venous thromboembolism</b>                  | n (%)                   | n (%)                      | X                        | X – X                   |         |
|                                                                                     | <b>Type of Venous thromboembolism</b>              |                         |                            |                          |                         |         |
|                                                                                     | Pulmonary embolism                                 | n (%)                   | n (%)                      | X                        | X – X                   |         |
|                                                                                     | Deep venous thrombosis                             | n (%)                   | n (%)                      | X                        | X – X                   |         |
|                                                                                     | Both Pulmonary embolism and deep venous thrombosis | n (%)                   | n (%)                      | X                        | X – X                   |         |
|                                                                                     | Above knee deep venous thrombosis                  | n (%)                   | n (%)                      | X                        | X – X                   |         |
|                                                                                     | Below knee deep venous thrombosis                  | n (%)                   | n (%)                      | X                        | X – X                   |         |
|                                                                                     | Death                                              | n (%)                   | n (%)                      | X                        | X – X                   |         |
|                                                                                     | Re-operation (90d)                                 | n (%)                   | n (%)                      | X                        | X – X                   |         |
|                                                                                     | Reoperation (6 months)                             | n (%)                   | n (%)                      | X                        | X – X                   |         |
|                                                                                     | Re-admission                                       | n (%)                   | n (%)                      | X                        | X – X                   |         |
|                                                                                     | Major Bleeding                                     | n (%)                   | n (%)                      | X                        | X – X                   |         |
|                                                                                     | Pain and Function (median and IQR) <sup>†</sup>    |                         |                            |                          |                         |         |
| Oxford Hip Score                                                                    |                                                    |                         | X                          | X – X                    |                         |         |
| Oxford Knee Score                                                                   | X (X – X)                                          | X (X – X)               | X                          | X – X                    |                         |         |
| EQ-5D                                                                               | X (X – X)                                          | X (X – X)               | X                          | X – X                    |                         |         |
| EQ-VAS                                                                              | X (X – X)                                          | X (X – X)               | X                          | X – X                    |                         |         |
| X (X – X)                                                                           | X (X – X)                                          | X (X – X)               |                            |                          |                         |         |

576

577 <sup>†</sup> at 6 months

578

579

580 **Subgroup Analyses**

581 Subgroup analyses for the primary outcome will include THA or TKA, bilateral or unilateral  
582 procedures and a prior history of VTE or not for population 1, and primary arthroplasty or  
583 revision arthroplasty for population 3.

584  
585 To assess treatment effects for each subgroup separately, cluster summaries will be  
586 produced for each subgroup. An interaction term between treatment group and subgroup  
587 (e.g., THA/TKA, bilateral/unilateral) will be added to the model for the primary outcome.  
588 The treatment differences for each subgroup will be assessed for non-inferiority. Since the  
589 trial was stopped early, the same composite method for the primary outcome will be used.

590

591

592 **Sensitivity analyses**

593 Sensitivity analyses will be performed to determine: (a) the effect of high-volume  
594 arthroplasty sites; (b) sites with high and low overall registration rates; (c) sites that  
595 required multiple compliance audits; and (d) the effect of patients who take long-term  
596 aspirin therapy on the results of the analyses for the primary outcome in population 1.

597

598 **Order of planned analyses**

599 Analyses will be performed in the following order:

- 600
- 601 • Interim analyses of population 1
  - 602 • Primary and secondary outcomes for population 1
  - 603 • Subgroup analyses for population 1
  - 604 • Primary and secondary outcomes for populations 2, 3 and 4
  - 605 • Subgroup analyses of population 3
  - 606 • Sensitivity analyses in population 1

607

608 **ADDITIONAL ANALYSES**

609

610 **Mortality Analysis**

611 In addition to analysing between-group mortality for populations 1, 2, 3 and 4, the between-  
612 group 90-day mortality will be analysed for two further populations:

- 613 1. All patients undergoing HA or KA over the duration of the study at participating  
614 hospitals, regardless of whether they were registered (total population described  
615 above, population 5)
- 616 2. All patients undergoing elective THA or TKA over the duration of the study at  
617 participating hospitals regardless of whether they were registered (a subset of  
618 population 5)

619

620 Analysing these additional populations will assess the effect of implementing the VTE  
621 prophylaxis protocol on mortality at an institutional/departmental level (the unit of  
622 randomisation), on an intention-to-treat basis.

623

624 **Sub-Studies**

625 Data from this trial will be used to form the basis of sub-studies. These will include a sub-  
626 study comparing rates of persistent wound drainage between LMWH and aspirin groups at  
627 two participating sites and a sub-study investigating rates of post-hospital discharge  
628 compliance to either study drug.

629

630

631

632 **Conclusions**

633 CRISTAL aims to provide much needed definitive evidence about the effectiveness and  
634 safety of aspirin compared to LMWH in preventing symptomatic VTE following HA or KA.  
635 This statistical analysis plan details the study's planned analyses, including modifications to  
636 intended analyses to account for early stopping of the trial.

637

638

639 **DECLARATIONS**

640

641 **Ethics Approval**

642 Ethics approval was granted by the Sydney Local Health District (Royal Prince Alfred Zone)  
643 Human Research and Ethics Committee, which is a lead ethics committee in Australia  
644 (approval number X18-0424) prior to study commencement. Site-specific approvals for each  
645 participating hospital were granted from the following ethics committees prior to study  
646 commencement: Calvary John James Memorial Hospital Australian Capital Territory (3-2019  
647 CRISTAL), Mid-North Coast Local Health District New South Wales (NSW – SSA/19/NCC/41),  
648 South Western Sydney Local Health District (NSW, SSA/10/LPOOL/22), Sydney Local Health  
649 District (NSW, SSA/19/RPAH/12, SSA/18/RPAH/762), Ramsay Hospital Research Foundation  
650 (NSW, HREC/18/RPAH/603), South Eastern Sydney Local Health District (NSW, 19/G/028,  
651 18/G/338), Nepean Blue Mountains Local Health District (NSW, SSA/19/NEPAN/11),  
652 Northern Sydney Local Health District (NSW, RESP/19/027, RESP/19/028), Metro North  
653 Hospital and Health Service (Queensland, HREC/18/RPAH/603), University of South Australia  
654 (SA – 201215), Calvary Health Care Adelaide (SA, 19-CHREC-F001), Southern Adelaide Local  
655 Health Network (SA, HREC/18/RPAH/603), Bendigo Health Victoria (SSA/48255/BHCG-2019),  
656 Barwon Health (18/246), Peninsula Health Victoria (SSA/48255/PH-2019), Western Health  
657 Victoria (48255), St John of God Health Care Victoria (1540), South Metropolitan Health  
658 Western Australia (WA – Western Australia, RGS0000001358), North Metropolitan Health  
659 (WA – RGS0000001358), Sir Charles Gardiner Hospital (WA – RGS0000001358) and  
660 Launceston General Hospital Tasmania (H0017903).

661

662 **Consent for publication**

663 Not applicable.

664 **Availability of data and materials**

665 The datasets during and/or analysed during the current study will be made available from  
666 the corresponding author on reasonable request

667 **Competing interests**

668 The authors declare that they have no competing interests

669 **Funding**

670 The study is being funded by a four-year Medical Research Futures Fund (MRFF – Australian  
671 Federal Government) grant. The funding was not provided with any conditions and the  
672 MRFF has no authority over the design of the study or collection, management, analysis or  
673 interpretation of data or the writing of manuscripts for submission. No industry funding or  
674 other sources of funding are being used for this trial.

675 **Authors' contributions**

676 All authors listed have contributed to this protocol and the ICMJE guidelines were consulted  
677 for determining authorship. VS, IAH, RB, SG, SA, JMN, RdS, NP, INA, ML, DB, KC and TLK  
678 were responsible for the planning of the trial, protocol development and writing, TLK and

679 NP were responsible for the description of the statistical analyses used. All authors  
680 reviewed the final version of this manuscript prior to submission.

681

682

683 **Acknowledgements**

684 Not applicable.

685



686 **REFERENCES**

687

- 688 1. Mirkazemi C, Bereznicki LR, Peterson GM. Comparing Australian orthopaedic  
689 surgeons' reported use of thromboprophylaxis following arthroplasty in 2012 and  
690 2017. *BMC Musculoskelet Disord.* 2019; 20:57.
- 691 2. Adam SS, McDuffie JR, Lachiewicz PF, Ortel TL, Williams JW, Jr. Comparative  
692 effectiveness of new oral anticoagulants and standard thromboprophylaxis in  
693 patients having total hip or knee replacement: a systematic review. *Ann Intern Med.*  
694 2013; 159:275-284.
- 695 3. Gomez-Outes A, Terleira-Fernandez AI, Suarez-Gea ML, Vargas-Castrillon E.  
696 Dabigatran, rivaroxaban, or apixaban versus enoxaparin for thromboprophylaxis  
697 after total hip or knee replacement: systematic review, meta-analysis, and indirect  
698 treatment comparisons. *BMJ.* 2012; 344:e3675.
- 699 4. Cao YB, Zhang JD, Shen H, Jiang YY. Rivaroxaban versus enoxaparin for  
700 thromboprophylaxis after total hip or knee arthroplasty: a meta-analysis of  
701 randomized controlled trials. *Eur J Clin Pharmacol.* 2010; 66:1099-1108.
- 702 5. Cohen A, Drost P, Marchant N, Mitchell S, Orme M, Rublee D, et al. The efficacy and  
703 safety of pharmacological prophylaxis of venous thromboembolism following  
704 elective knee or hip replacement: systematic review and network meta-analysis. *Clin*  
705 *Appl Thromb Hemost.* 2012; 18:611-627.
- 706 6. Harenberg J, Marx S, Dahl OE, Marder VJ, Schulze A, Wehling M, et al. Interpretation  
707 of endpoints in a network meta-analysis of new oral anticoagulants following total  
708 hip or total knee replacement surgery. *Thromb Haemost.* 2012; 108:903-912.
- 709 7. Neumann I, Rada G, Claro JC, Carrasco-Labra A, Thorlund K, Akl EA, et al. Oral direct  
710 Factor Xa inhibitors versus low-molecular-weight heparin to prevent venous  
711 thromboembolism in patients undergoing total hip or knee replacement: a  
712 systematic review and meta-analysis. *Ann Intern Med.* 2012; 156:710-719.
- 713 8. Turun S, Banghua L, Yuan Y, Zhenhui L, Ying N, Jin C. A systematic review of  
714 rivaroxaban versus enoxaparin in the prevention of venous thromboembolism after  
715 hip or knee replacement. *Thromb Res.* 2011; 127:525-534.
- 716 9. Bozic KJ, Vail TP, Pekow PS, Maselli JH, Lindenauer PK, Auerbach AD. Does aspirin  
717 have a role in venous thromboembolism prophylaxis in total knee arthroplasty  
718 patients? *J Arthroplasty.* 2010; 25:1053-1060.
- 719 10. Jameson SS, Baker PN, Charman SC, Deehan DJ, Reed MR, Gregg PJ, et al. The effect  
720 of aspirin and low-molecular-weight heparin on venous thromboembolism after  
721 knee replacement: a non-randomised comparison using National Joint Registry Data.  
722 *J Bone Joint Surg Br.* 2012; 94:914-918.
- 723 11. Jameson SS, Charman SC, Gregg PJ, Reed MR, van der Meulen JH. The effect of  
724 aspirin and low-molecular-weight heparin on venous thromboembolism after hip  
725 replacement: a non-randomised comparison from information in the National Joint  
726 Registry. *J Bone Joint Surg Br.* 2011; 93:1465-1470.
- 727 12. Anderson DR, Dunbar M, Murnaghan J, Kahn SR, Gross P, Forsythe M, et al. Aspirin  
728 or Rivaroxaban for VTE Prophylaxis after Hip or Knee Arthroplasty. *N Engl J Med.*  
729 2018; 378:699-707.
- 730 13. Anderson DR, Dunbar MJ, Kahn SR. Aspirin versus low-molecular-weight heparin  
731 after total hip arthroplasty. *Ann Intern Med.* 2013; 159:502-503.

- 732 14. Sidhu VS, Graves SE, Buchbinder R, Naylor JM, Pratt NL, de Steiger RS, et al. CRISTAL:  
733 protocol for a cluster randomised, crossover, non-inferiority trial of aspirin  
734 compared to low molecular weight heparin for venous thromboembolism  
735 prophylaxis in hip or knee arthroplasty, a registry nested study. *BMJ Open*. 2019;  
736 9:e031657.
- 737 15. [<https://www.sealedenvelope.com>]
- 738 16. Bjornara BT, Gudmundsen TE, Dahl OE. Frequency and timing of clinical venous  
739 thromboembolism after major joint surgery. *J Bone Joint Surg Br*. 2006; 88:386-391.
- 740 17. Kulshrestha V, Kumar S. DVT prophylaxis after TKA: routine anticoagulation vs risk  
741 screening approach - a randomized study. *J Arthroplasty*. 2013; 28:1868-1873.
- 742 18. Bawa H, Weick JW, Dirschl DR, Luu HH. Trends in Deep Vein Thrombosis Prophylaxis  
743 and Deep Vein Thrombosis Rates After Total Hip and Knee Arthroplasty. *J Am Acad  
744 Orthop Surg*. 2018; 26:698-705.
- 745 19. Giraudeau B, Ravaud P, Donner A. Sample size calculation for cluster randomized  
746 cross-over trials. *Stat Med*. 2008; 27:5578-5585.
- 747 20. Kelly T-L, Pratt N. A note on sample size calculations for cluster randomised  
748 crossover trials with a fixed number of clusters. *Stat Med*. 2019; 38:3342-3345.
- 749 21. AOA. Australian Orthopaedic Association National Joint Replacement Registry  
750 Annual Report. 2019.
- 751 22. Peto R, Pike MC, Armitage P, Breslow NE, Cox DR, Howard SV, et al. Design and  
752 analysis of randomized clinical trials requiring prolonged observation of each patient.  
753 I. Introduction and design. *Br J Cancer*. 1976; 34:585-612.
- 754 23. Haybittle JL. Repeated assessment of results in clinical trials of cancer treatment. *Br J  
755 Radiol*. 1971; 44:793-797.
- 756 24. White IR, Daniel R, Royston P. Avoiding bias due to perfect prediction in multiple  
757 imputation of incomplete categorical variables. *Comput Stat Data Anal*. 2010;  
758 54:2267-2275.
- 759 25. Rodwell L, Lee KJ, Romaniuk H, Carlin JB. Comparison of methods for imputing  
760 limited-range variables: a simulation study. *BMC Med Res Methodol*. 2014; 14:57.
- 761 26. Forbes AB, Akram M, Pilcher D, Cooper J, Bellomo R. Cluster randomised crossover  
762 trials with binary data and unbalanced cluster sizes: application to studies of near-  
763 universal interventions in intensive care. *Clin Trials*. 2015; 12:34-44.
- 764 27. Turner RM, White IR, Croudace T, Group PIPS. Analysis of cluster randomized cross-  
765 over trial data: a comparison of methods. *Stat Med*. 2007; 26:274-289.
- 766 28. Schumi J, Wittes JT. Through the looking glass: understanding non-inferiority. *Trials*.  
767 2011; 12:106.

770  
771  
772  
773  
774  
775  
776  
777

778 **STATISTICAL ANALYSIS PLAN (FINAL): 20 July 2021**

779

780 **TITLE PAGE**

781 **Study Title**

782 CRISTAL (A cluster-randomised, crossover, non-inferiority trial of aspirin compared to low  
783 molecular weight heparin for venous thromboembolism prophylaxis in hip or knee  
784 arthroplasty, a registry nested study): statistical analysis plan

785

786

787 **Corresponding Author:**

788 Dr Verinder Singh Sidhu (author)

789 Postal Address: Whitlam Orthopaedic Research Centre, Level 1, The Ingham Institute for  
790 Applied Medical Research, 1 Campbell Street, Liverpool, NSW, 2170

791 Email address: [Verinder.s.sidhu@gmail.com](mailto:Verinder.s.sidhu@gmail.com)

792 Phone: +61 422 167 435

793 Fax Number: +61 2 8738 3850

794

795 **Co-Authors**

796 14. Dr Thu-Lan Kelly (senior statistician)

797 Affiliation: Clinical and Health Sciences, Quality Use of Medicines Pharmacy Research  
798 Centre, University of South Australia, Adelaide, South Australia, Australia

799 15. Dr Nicole Pratt (senior statistician)

800 Affiliation: Clinical and Health Sciences, Quality Use of Medicines Pharmacy Research  
801 Centre, University of South Australia, Adelaide, South Australia, Australia

802 16. Professor Steven Graves

803 Affiliation: Australian Orthopaedic Association National Joint Replacement Registry,  
804 Adelaide, South Australia, Australia

805 17. Professor Rachelle Buchbinder

806 Affiliations:

807 iii. Department of Epidemiology and Preventive Medicine, Monash  
808 University School of Public Health, Melbourne, Victoria, Australia

809 iv. Monash Department of Clinical Epidemiology, Cabrini Institute,  
810 Melbourne, Victoria, Australia

811 18. Associate Professor Justine Naylor

812 Affiliation: Whitlam Orthopaedic Research Centre, Ingham Institute for Applied  
813 Medical Research, South West Sydney Clinical School, The University of New South  
814 Wales Sydney, Sydney, NSW, Australia

815 19. Professor Richard de Steiger

816 Affiliation: Department of Surgery, Epworth Healthcare, University of Melbourne,  
817 Melbourne, Victoria, Australia

818 20. Associate Professor Ilana Ackerman

819 Affiliation: Department of Epidemiology and Preventive Medicine, Monash  
820 University School of Public Health and Preventive Medicine, Melbourne, Victoria,  
821 Australia

822 21. Associate Professor Sam Adie

823 Affiliation: St. George and Sutherland Clinical School, The University of New South  
824 Wales Sydney, Sydney, NSW, Australia

- 825 22. Ms Michelle Lorimer  
826 Affiliation: South Australian Health and Medical Research Institute, Adelaide, South  
827 Australia, Australia  
828 23. Mrs Durga Bastiras  
829 Affiliation: Australian Orthopaedic Association National Joint Replacement Registry,  
830 Adelaide, South Australia, Australia  
831 24. Ms Kara Cashman  
832 Affiliation: South Australian Health and Medical Research Institute, Adelaide, South  
833 Australia, Australia  
834 25. Professor Ian Harris (chief investigator)  
835 Affiliations:  
836 iii. Whitlam Orthopaedic Research Centre, Ingham Institute for Applied  
837 Medical Research, South West Sydney Clinical School, The University  
838 of New South Wales Sydney, Sydney, NSW, Australia  
839 iv. Institute of Musculoskeletal Health, School of Public Health, The  
840 University of Sydney, Sydney, NSW, Australia  
841

842 **ABSTRACT**

843

844 **Background:**

845 This *a priori* statistical analysis plan describes the analysis for CRISTAL.

846

847 **Methods:**

848 CRISTAL (cluster-randomised, crossover, non-inferiority trial of aspirin compared to low  
849 molecular weight heparin for venous thromboembolism prophylaxis in hip or knee  
850 arthroplasty, a registry nested study) aims to determine whether aspirin is non-inferior to  
851 low molecular weight heparin (LMWH) in preventing symptomatic venous  
852 thromboembolism (VTE) following hip arthroplasty (HA) or knee arthroplasty (KA). The study  
853 is nested within the Australian Orthopaedic Association National Joint Replacement  
854 Registry. The trial was commenced in April 2019 and after an unplanned interim analysis,  
855 recruitment was stopped (December 2020), as the stopping rule was met for the primary  
856 outcome.

857

858 The clusters comprised hospitals performing > 250 HA and/or KA procedures per annum,  
859 whereby all adults (> 18 years) undergoing HA or KA were recruited. Each hospital was  
860 randomised to commence with aspirin, orally, 85-150mg daily or LMWH (enoxaparin),  
861 40mg, subcutaneously, daily within 24 hours postoperatively, for 35 days after HA and 14  
862 days after KA. Crossover was planned once the registration target was met for the first arm.

863

864 The primary end point is symptomatic VTE within 90 days. Secondary outcomes include  
865 readmission, reoperation, major bleeding and death within 90 days, and reoperation and  
866 patient-reported pain, function and health status at 6 months.

867

868 The main analyses will focus on the primary and secondary outcomes for patients  
869 undergoing elective primary total HA and KA for osteoarthritis. The analysis will use an  
870 intention-to-treat approach with cluster summary methods to compare treatment arms. As  
871 the trial stopped early, analyses will account for incomplete cluster crossover and unequal  
872 cluster sizes.

873

874 **Conclusions:**

875 This paper provides a detailed statistical analysis plan for CRISTAL.

876

877 **Trial registration:** Australian and New Zealand Clinical Trials Registry, ID:  
878 ACTRN12618001879257. Registered on 19/11/2018.

879

880

881 **Key Words**

882 Venous Thromboembolism, Hip Arthroplasty, Knee Arthroplasty, Aspirin, Low Molecular  
883 Weight Heparin, Statistical Analysis Plan

884

885 **MANUSCRIPT**

886

887 **Background**

888 Despite the increasing use of aspirin as a sole chemotherapeutic agent for symptomatic  
889 venous thromboembolic event (VTE) prophylaxis following hip arthroplasty (HA) and knee  
890 arthroplasty (KA) [1], there remains limited high quality comparative evidence for its safety  
891 and efficacy. The majority of studies supporting the safety and efficacy of aspirin compared  
892 to other agents, including low molecular weight heparin (LMWH), have been retrospective  
893 or non-randomised [2-11]. The only randomised trials have been underpowered or have  
894 used an alternative form of prophylaxis (e.g., LMWH or a novel oral anticoagulant (NOAC))  
895 for the immediate postoperative period following HA or KA prior to changing to aspirin for  
896 extended prophylaxis, which does not reflect the way aspirin is used in Australia [12, 13].  
897 CRISTAL is a pragmatic, multicentre cluster-randomised, two period cross-sectional  
898 crossover trial that aims to determine if aspirin is non-inferior to LMWH in the prevention of  
899 symptomatic VTE following HA and KA. It is nested within the Australian Orthopaedic  
900 Association National Joint Replacement Registry (AOANJRR).

901

902 The trial commenced in April 2019 and the estimated timeline for completion of patient  
903 registration was 24 months. However, after an unplanned interim analysis in which the trial  
904 stopping rule was met, patient registration was ceased in December 2020, resulting in  
905 incomplete crossover. This statistical analysis plan details the planned analyses for CRISTAL  
906 to facilitate transparency of data analysis. The CONSORT statement for cluster randomised  
907 trials was referred to in preparation of this document [14]. The trial protocol has previously  
908 been published [15].

909 **STUDY OVERVIEW**

910

911 **Ethics**

912 Ethics approval was granted from all relevant central, lead ethics committees involved and  
913 all participating hospitals, as outlined in the published trial protocol [15]. The trial is  
914 registered with the Australian New Zealand Clinical Trials Registry  
915 (ACTRN12618001879257p) and is endorsed by the Australia and New Zealand  
916 Musculoskeletal (ANZMUSC) Clinical Trials Network.

917

918 **Participating Hospitals and Patient Registration**

919 The clusters in CRISTAL were defined as hospitals where hip and knee arthroplasty  
920 procedures were performed. Hospitals were eligible for recruitment provided they agreed  
921 to follow the trial protocol and if they performed greater than 250 HA and/or KA procedures  
922 per annum. There were 31 hospitals (clusters) that were recruited.

923

924 Each recruited hospital was responsible for registering patients and complying with the trial  
925 protocol. The AOANJRR routinely collects data pertaining to the procedure, patient age, sex,  
926 American Society of Anaesthesiologists (ASA) class and body mass index (BMI) and death on  
927 all patients undergoing HA and KA procedures. Patient-reported outcomes are collected  
928 through the electronic Clinical Trials Platform, which requires pre-operative registration of  
929 the patient onto the electronic system. All adult (age 18 and older) patients undergoing HA  
930 or KA were eligible for registration into the study and eligible to receive the allocated study  
931 drug, except for those who were already on long-term anticoagulation (specifically a NOAC,

932 warfarin or dual antiplatelet therapy (DAPT)) and those with a medical contraindication to  
933 either drug, e.g., an allergy or a medical comorbidity such as thrombophilia that precluded  
934 treatment with the study drug.

935

936 Patients who were not registered in the electronic Clinical Trials Platform will be included in  
937 secondary analyses, as procedure information, demographics and mortality were still  
938 recorded even though the primary outcome and other patient-reported outcomes were not  
939 recorded.

940

#### 941 **Intervention**

942 Each hospital (cluster) was allocated to consecutive periods of a standard protocol of LMWH  
943 and a standard protocol of aspirin as VTE prophylaxis, with the order being randomised.

944 Patients in the aspirin group received aspirin at 85-150mg once daily, orally for 35 days post  
945 HA and for 14 days post KA, commencing within 24 hours of surgery. Patients in the LMWH  
946 group received enoxaparin at 40mg once daily, subcutaneously for the same time periods,  
947 with this dose reduced to 20mg for patients who weigh less than 50kg and for patients with  
948 an estimated glomerular filtration rate (eGFR) of less than 30mL/min who are not on  
949 dialysis. Other interventions that were standard across all sites were the intra- and post-  
950 operative use of intermittent pneumatic compression (IPC) calf devices until patients are  
951 mobile, the use of compression stockings, and mobilisation offered on day 0 or day 1  
952 postoperatively.

953

954

#### 955 **Randomisation and allocation**

956 Study investigators have remained blinded to group allocation. All 31 participating hospitals  
957 were randomised to commence with either LMWH or aspirin, in randomly permuted blocks  
958 of size four by statisticians from the South Australian Health and Medical Research Institute  
959 (SAHMRI), independent of study investigators. The randomisation sequence was generated  
960 using an online application [16] and this was provided to an unblinded data manager from  
961 SAHMRI. The hospital was then allocated to a treatment sequence by SAHMRI staff and this  
962 information was provided to the AOANJRR (independent of study investigators), with the  
963 site being informed of their allocated treatment arm the week prior to commencing initial  
964 patient registration. Hospitals followed the designed protocol for patients for their allocated  
965 treatment arm and were advised to crossover to the alternate treatment once the sample  
966 size for the first treatment arm was met.

967

968 For clusters who did not reach the sample size for the first arm within 18 months of  
969 commencement, crossover occurred prior to reaching the sample size so that an equal  
970 number of patients could be registered in each arm within the study timeframe.

971

#### 972 **Evaluation of adherence to the study protocol and protocol deviations**

973 At a hospital level, during the course of the trial each hospital was audited within the first  
974 month of each treatment arm to ensure they were complying with the trial protocol and to  
975 ensure each cluster received the intended allocated treatment. The audit consisted of the  
976 first 20 patients of each treatment arm. If a site had a compliance of less than 80%, the site  
977 was educated on methods of improving protocol compliance and subsequently re-audited  
978 until compliance to the protocol was above 80%.

979

980 Hospitals were also advised to inform trial co-ordinators of patients not receiving the  
981 correct study drug or those patients who had the study drug withheld for greater than 48  
982 hours due to side effects (e.g. allergy, excessive wound drainage or bleeding events). These  
983 protocol deviations were recorded using the Clinical Trials Platform.

984

985

#### 986 **Outcome variables**

987 The primary outcome of the study is symptomatic VTE within 90 days of surgery. Secondary  
988 outcomes are:

- 989 • Deep vein thrombosis (DVT) only (total, below-knee and above-knee) within 90 days
- 990 • Pulmonary embolism (PE) only within 90 days
- 991 • Readmission related to the original surgery or associated treatment (including  
992 bleeding and VTE-related) within 90 days
- 993 • Reoperation on the same joint within 90 days and within 6 months of surgery
- 994 • Major bleeding events within 90 days defined as bleeding events resulting in  
995 readmission, reoperation or death
- 996 • Death within 90 days
- 997 • Change in patient-reported pain, function and health status measures as measured  
998 by the Oxford Hip Score (OHS), Oxford Knee Score (OKS), EQ-5D score and the EQ-  
999 VAS from baseline to 6 months postoperatively

1000

1001

1002 Outcome and demographic data were collected preoperatively (demographics, patient  
1003 reported pain, function and health status) and at 90 days and 6 months postoperatively.  
1004 Data for all primary and secondary outcomes are patient-reported (except for death). All  
1005 patients who responded 'yes' to having experienced a VTE or a secondary operation within  
1006 6 months had this result verified by AOANJRR staff through contact with treating doctors  
1007 and hospitals. A random audit of 200 patients who did not report a VTE event was  
1008 undertaken to detect the false negative reporting rate. All data collected for registered  
1009 patients specific to CRISTAL have been outlined in the published protocol [15]. Mortality  
1010 data were collected through linkage between the AOANJRR and the National Death Index.

1011

1012 In the published protocol [15], mortality was to be measured at 90 days and 6 months. Due  
1013 to the lack of sensitivity in measuring VTE-related mortality at 6 months, and due to the lag  
1014 in data availability for mortality, we will only analyse mortality at 90 days [17].

1015

1016

#### 1017 **Power and sample size**

1018 For the sample size calculation in CRISTAL, we used an estimated overall event rate of 2%  
1019 (based on the current available literature) [18, 19], a non-inferiority margin of 1% (based on  
1020 clinician opinion and a recent randomised controlled trial) [12], i.e., an event rate of 2.5%  
1021 for aspirin and 1.5% for LMWH, a power of 90% and a one-sided significance level of 0.025.  
1022 For an individual randomised trial, this yields a sample size of 4,117 per treatment group or  
1023 a total of 8,234 patients. For a cluster-randomised crossover trial with an intracluster  
1024 correlation of 0.01, an interperiod correlation of 0.008 and 31 clusters, the required sample



1025 size is 11,160 patients, or 180 patients per arm for each cluster [20, 21]. However, due to  
1026 the uncertainty surrounding the event rate and intracluster and interperiod correlations,  
1027 loss to follow-up, uneven recruitment rates leading to unequal cluster sizes or clusters  
1028 dropping out of the study, we aimed to register 251 patients eligible for the primary  
1029 objective of the study, providing a total of 15,562 patients. This figure allowed for a  
1030 maximum 27% reduction in the above sample size calculation [15], however, actual loss to  
1031 follow-up was expected to be less than this.  
1032  
1033

1034 **STATISTICAL ANALYSIS PLAN**

1035 **Patient Populations and Subgroups for Analyses**

1036 The total patient population for CRISTAL comprises all patients undergoing HA or KA at  
1037 participating institutions over the duration of the study, regardless of whether these  
1038 patients were registered or eligible to receive the study drug (defined as population 5, see  
1039 Figure 1).

1040

1041 Within this total population, the following populations will be used to form the basis of the  
1042 analyses:

- 1043 • Registered patients undergoing any form of HA or KA (including partial or revision  
1044 surgery, for any indication) regardless of eligibility to receive the study drug  
1045 (population 4)
- 1046 • Registered patients undergoing any form of HA or KA (including partial or revision  
1047 surgery, for any indication) who were eligible to receive the study drug (population  
1048 3)
- 1049 • Registered patients undergoing elective primary THA or TKA (for any indication) who  
1050 were eligible to receive the study drug (population 2)
- 1051 • All registered patients undergoing elective primary THA or TKA for a recorded  
1052 diagnosis of osteoarthritis (OA) who were eligible to receive the study drug  
1053 (population 1)

1054

1055 These populations are represented diagrammatically in Figure 1.

1056

1057

1058

1059 **Figure 1.** Patient populations within CRISTAL

1060

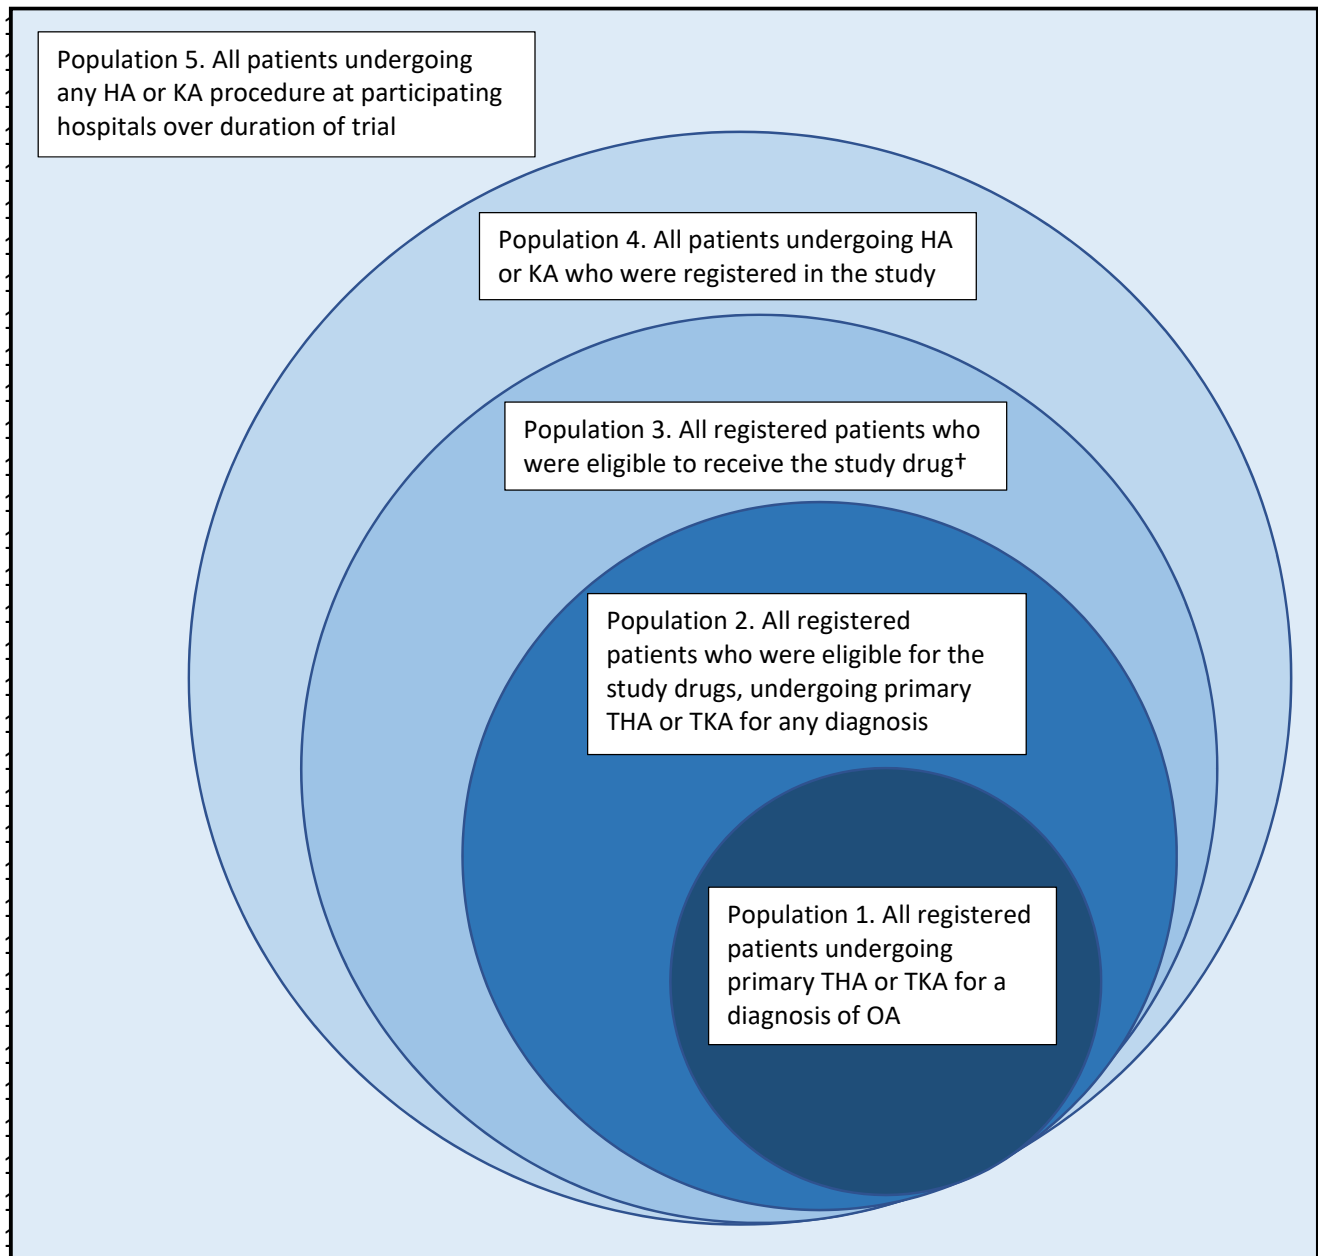

1095

1096

1097 **Legend:**

1098 Abbreviations: *HA* hip arthroplasty, *KA* knee arthroplasty, *THA* total hip arthroplasty, *TKA* total knee arthroplasty, *OA*

1099 osteoarthritis

1100 † Study drug excluded for patients who already on long-term anticoagulation (specifically a novel oral anticoagulant –

1101 NOAC, warfarin or dual antiplatelet therapy – DAPT) and those who have a medical contraindication

1102

1103 Each outcome (primary and secondary) will be assessed for populations 1, 2, 3 and 4 listed  
1104 in Figure 1. Mortality will be assessed for all populations (including population 5). The  
1105 primary objective of the study as outlined in the published protocol [15], was the analysis of  
1106 population 1 only (registered patients undergoing primary THA or TKA for a diagnosis of OA  
1107 who are eligible to receive the study drug), as this was the focus of the sample size  
1108 calculation. This population will remain the focus of the main analyses.

1109

1110 Population 1 was chosen as the focus of the main analysis as these patients represent the  
1111 majority of patients undergoing HA or KA procedures and there are known differences in  
1112 outcomes and co-morbidities with other diagnoses (e.g., fracture, tumour), which could  
1113 confound the primary outcome [22].

1114

1115 For the primary end point of VTE, the following subgroup analyses will be conducted within  
1116 the corresponding populations listed:

1117

- Type of joint replacement: primary THA compared to primary TKA – population 1

1118

- Bilateral arthroplasty: patients undergoing simultaneous bilateral arthroplasty  
1119 compared to those who are not – population 1

1120

- Revision arthroplasty: patients undergoing revision hip or knee arthroplasty  
1121 compared to those undergoing primary arthroplasty – population 3

1122

- Prior history of VTE: patients with a prior history of VTE compared to those without –  
1123 population 1

1124

1125

### 1126 **Analysis principles**

1127

1128 Data will be analysed according to the intention-to-treat principle with clusters analysed  
1129 according to assigned group allocation. Although hospital and patient protocol deviations  
1130 will be recorded, no as-treated analyses will be performed, as there are no verified data  
1131 available to determine whether individual patients received the assigned study drug for the  
1132 full period, given the pragmatic nature of the trial. The timing of analyses will be stratified  
1133 by follow-up time of the outcomes measured (90 days and 6 months). The difference in  
1134 absolute risk for symptomatic VTE between each group and 95% confidence intervals (upper  
1135 and lower) will be examined to determine if the non-inferiority margin is met.

1135

1136

1137 Continuous variables will be summarised using standard measures of central tendency and  
1138 dispersion, using either mean and standard deviation or median and interquartile range.

1138

1139 Categorical variables will be summarised by frequencies and percentages.

1139

1140

1141 Analyses will be performed using SAS version 9.4 (SAS Institute, Cary USA) and R (R

1141

1142 Foundation for Statistical Computing Platform) version 4.0.2 or higher.

1142

1143

### 1144 **Interim analysis**

1145

1146 An interim analysis was not initially planned, as both treatments are considered standard  
1147 practice for VTE prophylaxis in Australia and the trial is investigating an adverse event as the  
1148 primary outcome. However, due to concerns of an increased adverse event rate  
(symptomatic VTE and death) in one of the prophylaxis groups, a Data Safety Monitoring

1149 Board (DSMB) was convened one year into patient recruitment. The DSMB consisted of an  
1150 orthopaedic surgeon, a haematologist and a statistician, all independent of the trial.

1151

1152 The DSMB were advised by the Trial Management Committee (TMC) to conduct an interim  
1153 analysis. In conjunction with the DSMB (prior to the interim analysis), the TMC applied the  
1154 Haybittle-Peto stopping rule of a two-sided significance of 0.001 for the primary outcome in  
1155 the population 1 [23, 24]. This stopping rule was chosen as it does not require adjustment of  
1156 the significance threshold for the final analysis and allows further interim analyses using the  
1157 same threshold (if required).

1158

1159 After the first interim analysis (in September 2020), the DSMB recommended continuing the  
1160 trial and performing a second interim analysis in November 2020. After reviewing the  
1161 second interim analysis, the DSMB recommended ceasing patient recruitment as the  
1162 stopping rule had been met. The study ceased recruiting patients in December 2020 and  
1163 sites reverted to their usual VTE prophylaxis pathways.

1164

#### 1165 ***Methods used for Interim Analyses***

1166 Interim analyses were conducted for VTE and mortality within 90 days for population 1. To  
1167 account for unequal cluster sizes, incomplete crossover or clusters which had not yet  
1168 crossed over, a composite analysis was designed. For clusters which had crossed over,  
1169 including with partial completion of the second period, the cluster weighted estimator  
1170 intended for the primary outcome was used. Harmonic mean weighting when there are  
1171 unequal cluster sizes has been shown to improve precision and 95% confidence interval  
1172 coverage compared with unweighted or inverse variance estimates [25, 26]. Clusters which  
1173 had not crossed over were analysed using the cluster period summaries, weighted by cluster  
1174 size, in a parallel design approach, i.e., as if it were a cluster randomised trial without  
1175 crossover. Estimates for the two approaches were combined using inverse variance weights  
1176 to provide a final estimate. Confidence intervals were constructed using the Haybittle-Peto  
1177 boundary of 0.001.

1178

#### 1179 **Data integrity**

1180 Integrity of data will be checked prior to conducting the final analysis. The data set will be  
1181 checked for errors, omissions and double data entry. These will be resolved prior to  
1182 commencing the analysis in consultation with the data management plan [15].

1183

#### 1184 **Blinding**

1185 The DSMB were blinded to treatment allocation (groups in the interim analyses were  
1186 labelled A and B). All researchers involved in the preparation of this analysis plan will have  
1187 no access to trial data broken down by treatment allocation for the final statistical analysis.  
1188 Once data integrity checks have been conducted, a blind review to quantify missing data of  
1189 the entire dataset will be conducted and any final amendments to the statistical analysis  
1190 plan will be made before the database is locked. During analysis and interpretation, group  
1191 allocation will be masked by dummy group names and the true allocation will be unmasked  
1192 only after the final statistical report has been completed and interpretation has been agreed  
1193 to by the writing group and minuted.

1194

1195

1196 **Methods for handling missing data**

1197 Multiple imputation using chained equations will be used to account for missing data. The  
1198 imputation model will use auxiliary variables gathered from routine AOANJRR data  
1199 (including age, sex, baseline health, pain and function, diagnosis and surgical factors), as  
1200 well as cluster and period effects. One hundred datasets will be imputed at the patient level,  
1201 then each dataset will be analysed using the main analysis method with cluster summaries  
1202 and combined using Rubin’s rules. If there is any possibility of bias due to perfect prediction  
1203 of rare outcomes such as VTE [27] or imputing values out of range for bounded variables  
1204 such as pain scores or EQ5D [28], multiple imputation using chained equations will not be  
1205 performed. Since the most likely reason for loss to follow-up is difficulty in contacting  
1206 patients postoperatively (rather than association with treatment assignment or outcome),  
1207 missing data will be assumed to be missing at random.

1208  
1209 As a further sensitivity analysis for the primary outcome only, inverse probability weighting,  
1210 where the complete cases are weighted by the inverse probability of being complete case  
1211 will also be used to account for missing data. Inverse probability weighting has an advantage  
1212 over multiple imputation when there are large blocks of missing data with either observed  
1213 values for all variables or missing values for the majority of the variables, for example, pre-  
1214 operative pain and function scores [29]. The inverse probability weights will be used to  
1215 produce weighted cluster summaries, which will be analysed using the main analysis  
1216 method, with cluster sizes calculated as the sum of the inverse probability weights.

1217

1218

1219 **Trial profile and baseline characteristics**

1220 The flow of participating hospitals (including losses and exclusions) through the study and  
1221 participating patients will be reported in line with the Consolidated Standards of Reporting  
1222 Trials (CONSORT) statement (Figures 2 and 3).

1223

1224 Baseline characteristics of participating clusters, including number of annual HA and KA  
1225 procedures performed in the year prior to trial commencement, hospital type (public or  
1226 private hospital), initial treatment allocation and whether the hospital achieved crossover  
1227 are shown in Table 1. This table also shows the number of patients registered for population  
1228 1 (the population used for the sample size calculation) by each participating hospital and the  
1229 overall registration rate of each hospital will be presented as outlined. The overall  
1230 registration rate describes the number of registered patients undergoing any HA or KA  
1231 procedure (population 4) divided by the number of patients who underwent any HA or KA  
1232 procedure over the duration of the trial at participating hospitals (regardless of whether  
1233 they were registered – population 5). Hospital names will remain anonymous.

1234

1235 Descriptive statistics of baseline patient characteristics for all registered patients eligible to  
1236 receive the study drug (population 3) will be presented by prophylaxis group (Table 2).

1237

1238

1239  
1240  
1241  
1242  
1243  
1244

**Figure 2.** Flowsheet of participating hospitals

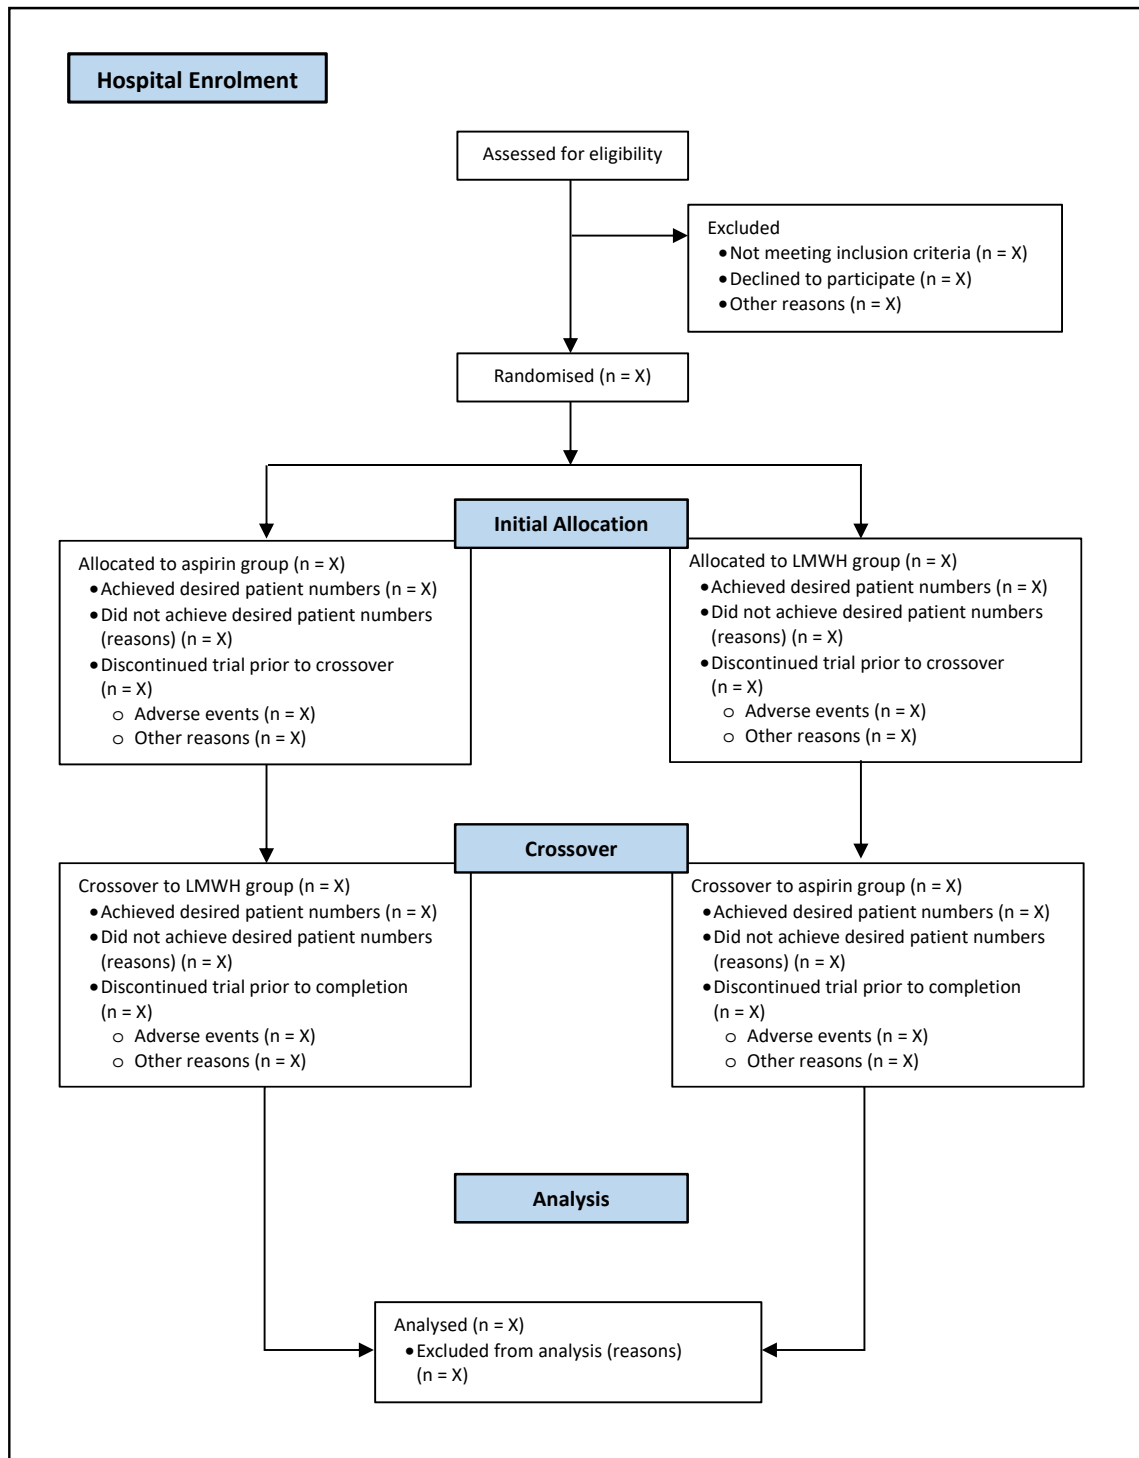

1245 **Figure 3.** Flowsheet of patients within population 1<sup>†</sup>

1246  
1247  
1248  
1249  
1250  
1251  
1252  
1253  
1254  
1255  
1256  
1257  
1258  
1259  
1260  
1261  
1262  
1263  
1264  
1265  
1266  
1267  
1268  
1269  
1270  
1271  
1272  
1273  
1274  
1275  
1276  
1277  
1278  
1279  
1280  
1281  
1282  
1283  
1284  
1285  
1286  
1287  
1288

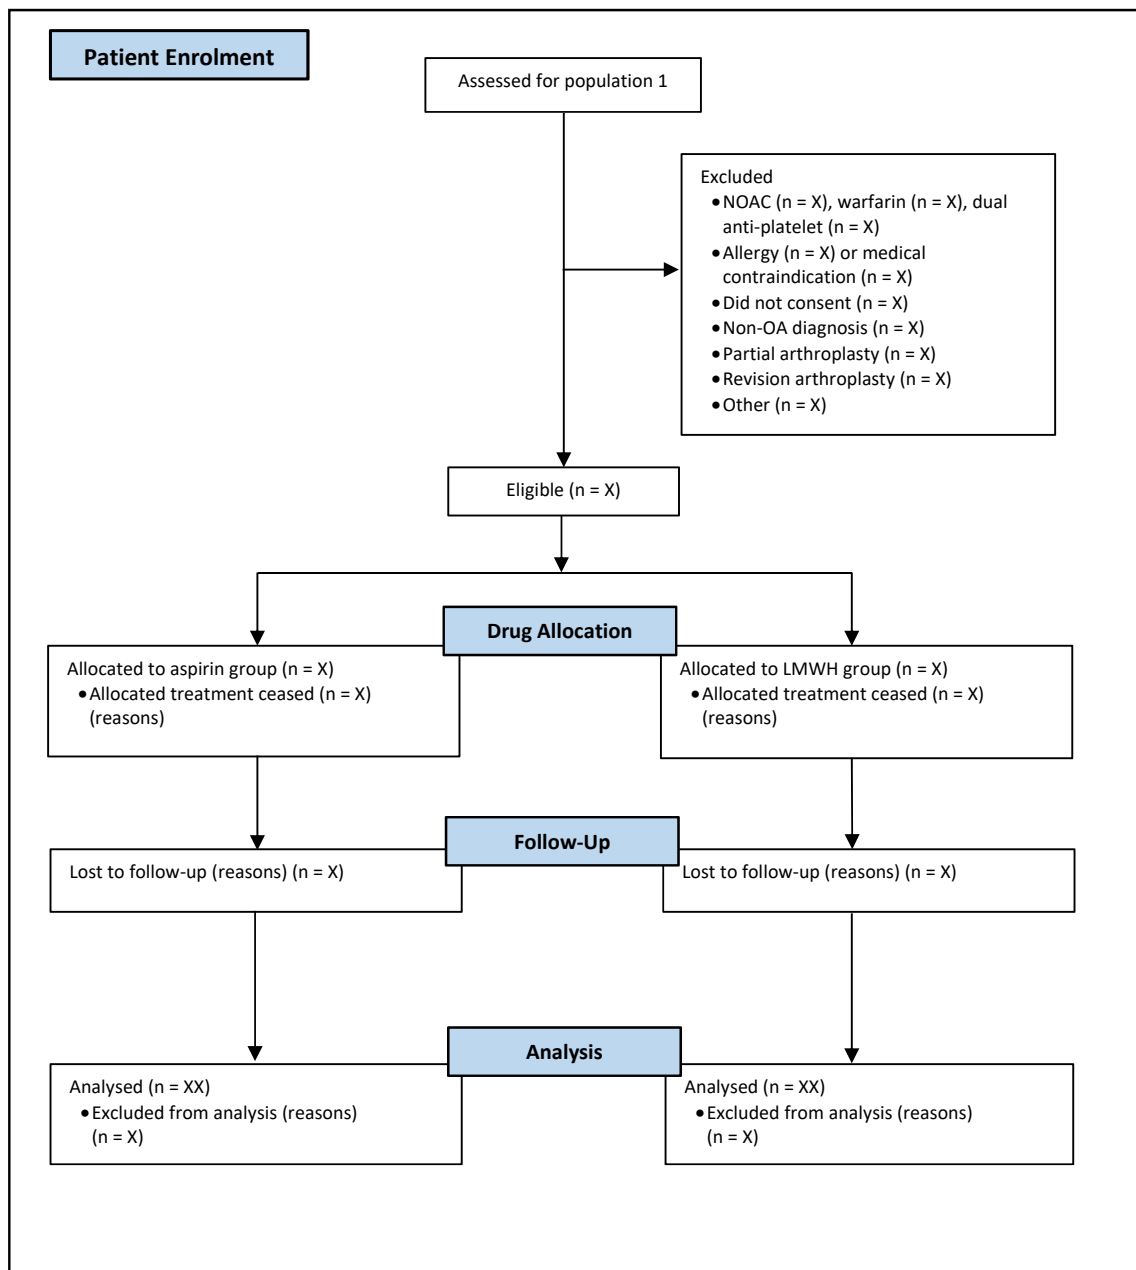

<sup>†</sup> Population 1 refers to registered patients undergoing primary THA or TKA for a diagnosis of OA, who are eligible to receive the study drug



1289 **Table 1.** Number of registered patients for population 1<sup>†</sup> by treatment group and overall  
 1290 registration rate for each participating hospital  
 1291

| Hospital     | Number of HA and KA Procedures performed (2018) | Insurance Status | Initial Treatment Allocation | Crossover Achieved | LMWH Group (Population 1) | Aspirin Group (Population 1) | Overall Registration Rate (combined for both groups) |
|--------------|-------------------------------------------------|------------------|------------------------------|--------------------|---------------------------|------------------------------|------------------------------------------------------|
| 1            |                                                 |                  |                              |                    | n                         | n                            | %                                                    |
| 2            |                                                 |                  |                              |                    | n                         | n                            | %                                                    |
| 3            |                                                 |                  |                              |                    | n                         | n                            | %                                                    |
| 4            |                                                 |                  |                              |                    | n                         | n                            | %                                                    |
| 5            |                                                 |                  |                              |                    | n                         | n                            | %                                                    |
| 6            |                                                 |                  |                              |                    | n                         | n                            | %                                                    |
| 7            |                                                 |                  |                              |                    | n                         | n                            | %                                                    |
| 8            |                                                 |                  |                              |                    | n                         | n                            | %                                                    |
| 9            |                                                 |                  |                              |                    | n                         | n                            | %                                                    |
| 10           |                                                 |                  |                              |                    | n                         | n                            | %                                                    |
| 11           |                                                 |                  |                              |                    | n                         | n                            | %                                                    |
| 12           |                                                 |                  |                              |                    | n                         | n                            | %                                                    |
| 13           |                                                 |                  |                              |                    | n                         | n                            | %                                                    |
| 14           |                                                 |                  |                              |                    | n                         | n                            | %                                                    |
| 15           |                                                 |                  |                              |                    | n                         | n                            | %                                                    |
| 16           |                                                 |                  |                              |                    | n                         | n                            | %                                                    |
| 17           |                                                 |                  |                              |                    | n                         | n                            | %                                                    |
| 18           |                                                 |                  |                              |                    | n                         | n                            | %                                                    |
| 19           |                                                 |                  |                              |                    | n                         | n                            | %                                                    |
| 20           |                                                 |                  |                              |                    | n                         | n                            | %                                                    |
| 21           |                                                 |                  |                              |                    | n                         | n                            | %                                                    |
| 22           |                                                 |                  |                              |                    | n                         | n                            | %                                                    |
| 23           |                                                 |                  |                              |                    | n                         | n                            | %                                                    |
| 24           |                                                 |                  |                              |                    | n                         | n                            | %                                                    |
| 25           |                                                 |                  |                              |                    | n                         | n                            | %                                                    |
| 26           |                                                 |                  |                              |                    | n                         | n                            | %                                                    |
| 27           |                                                 |                  |                              |                    | n                         | n                            | %                                                    |
| 28           |                                                 |                  |                              |                    | n                         | n                            | %                                                    |
| 29           |                                                 |                  |                              |                    | n                         | n                            | %                                                    |
| 30           |                                                 |                  |                              |                    | n                         | n                            | %                                                    |
| 31           |                                                 |                  |                              |                    | n                         | n                            | %                                                    |
| <b>Total</b> |                                                 |                  |                              |                    | <b>n</b>                  | <b>n</b>                     | <b>%</b>                                             |

1292  
 1293 <sup>†</sup> Population 1 refers to registered patients undergoing primary THA or TKA for a diagnosis of OA, who are eligible to receive the study  
 1294 drug  
 1295  
 1296  
 1297

1298 **Table 2.** Baseline patient characteristics for all registered patients eligible to receive study  
 1299 drug (population 3), according to treatment allocation  
 1300

|                                 | <b>LMWH</b><br>(n = X) | <b>Aspirin</b><br>(n = X) |
|---------------------------------|------------------------|---------------------------|
| Age (years)                     | xx.x (xx.x – xx.x), n  | xx.x (xx.x – xx.x), n     |
| BMI (kg/m <sup>2</sup> )        | xx.x (xx.x – xx.x), n  | xx.x (xx.x – xx.x), n     |
| Male sex                        | n (%)                  | n (%)                     |
| ASA Grading                     |                        |                           |
| 1                               | n (%)                  | n (%)                     |
| 2                               | n (%)                  | n (%)                     |
| 3                               | n (%)                  | n (%)                     |
| 4                               | n (%)                  | n (%)                     |
| 5                               | n (%)                  | n (%)                     |
| Previous venous thromboembolism | n (%)                  | n (%)                     |
| Long term anticoagulant use     |                        |                           |
| Aspirin                         | n (%)                  | n (%)                     |
| Other single antiplatelet       | n (%)                  | n (%)                     |
| Joint replacement               |                        |                           |
| THA                             | n (%)                  | n (%)                     |
| TKA                             | n (%)                  | n (%)                     |
| Other HA                        | n (%)                  | n (%)                     |
| Other KA                        | n (%)                  | n (%)                     |
| Bilateral                       | n (%)                  | n (%)                     |
| Type of surgery                 |                        |                           |
| Primary total                   | n (%)                  | n (%)                     |
| Primary partial                 | n (%)                  | n (%)                     |
| Primary resurfacing             | n (%)                  | n (%)                     |
| Revision                        | n (%)                  | n (%)                     |
| Other                           | n (%)                  | n (%)                     |
| Indication                      |                        |                           |
| Osteoarthritis                  | n (%)                  | n (%)                     |
| Inflammatory                    | n (%)                  | n (%)                     |
| Avascular Necrosis              | n (%)                  | n (%)                     |
| Fracture                        | n (%)                  | n (%)                     |
| Other                           | n (%)                  | n (%)                     |
| Prosthesis                      |                        |                           |
| Cemented                        | n (%)                  | n (%)                     |
| Hybrid                          | n (%)                  | n (%)                     |
| Uncemented                      | n (%)                  | n (%)                     |
| Pain and Function               |                        |                           |
| Oxford Hip Score                | xx.x (xx.x – xx.x), n  | xx.x (xx.x – xx.x), n     |
| Oxford Knee Score               | xx.x (xx.x – xx.x), n  | xx.x (xx.x – xx.x), n     |
| EQ-5D                           | xx.x (xx.x – xx.x), n  | xx.x (xx.x – xx.x), n     |
| EQ-VAS                          | xx.x (xx.x – xx.x), n  | xx.x (xx.x – xx.x), n     |

Abbreviations: *BMI* body mass index, *ASA* American society of anaesthesiologists

1301  
 1302  
 1303  
 1304

1305 **MAIN ANALYSES**

1306

1307 The main analyses will include the primary and secondary outcomes for registered patients  
1308 eligible to receive the study drug undergoing THA or TKA for a diagnosis of OA (population  
1309 1). In addition, the primary and secondary outcomes will be analysed for populations 2, 3  
1310 and 4. Mortality will also be analysed for population 5 (see “Additional analyses” below).

1311

1312 For the primary outcome, the analysis will test the between-group difference of cases  
1313 developing a symptomatic VTE within 90 days for non-inferiority of aspirin at a margin of  
1314 1%. Cluster summary methods will be used to estimate the treatment effect using cluster  
1315 level differences. These have been shown to be appropriate for cluster-randomised  
1316 crossover trials with rare outcomes, and the intracluster and interperiod correlation  
1317 coefficients expected in this trial. The crossover difference per cluster is the mean outcome  
1318 for the intervention period minus the mean outcome for the control period. In a linear  
1319 regression of cluster differences on treatment sequence, the treatment effect estimate is  
1320 the intercept. To account for potential unequal cluster sizes, a cluster size weighted  
1321 estimator will be used with harmonic mean weights of the number of patients in the two  
1322 periods, which was the same method used in the interim analyses for incomplete crossover  
1323 [25, 26]. Treatment effects will be presented as absolute risk differences and 95%  
1324 confidence intervals will be examined to determine whether the non-inferiority margin has  
1325 been met and whether superiority of one drug can be concluded. The primary outcome will  
1326 be presented in Table 3 and Figure 4 will be used to demonstrate whether the non-  
1327 inferiority margin has been met for the population 1 [30].

1328

1329

1330 The secondary outcomes will investigate non-VTE complications (death, re-operation,  
1331 readmission and major bleeding events) within 90 days, and reoperation and patient-related  
1332 pain and function at 6 months (OHS, OKS, EQ-5D and EQ-VAS). Cluster summary methods  
1333 will be used within an intention-to treat approach. For binary outcomes, the cluster mean  
1334 per period will be the proportion of patients who had the outcome, while for continuous  
1335 outcomes such as pain score, the cluster mean will be the mean outcome. Treatment  
1336 effects will be presented as absolute risk differences and 95% confidence intervals to  
1337 determine if one treatment is superior to the alternative. Results for the secondary  
1338 outcomes in population 1 will be presented in tabular form (Table 3) and results for the  
1339 primary and secondary outcomes in populations 2, 3 and 4 in Table 4.

1340

1341 Due to the early stopping of the trial, final analyses of the primary and secondary outcomes  
1342 will use the same composite method as the interim analyses which accounts for clusters  
1343 with incomplete as well as no crossover, with 95% confidence intervals. No bias is expected  
1344 from early stopping if the patients included in the trial are not systematically different from  
1345 later patients who would have been included after the trial was stopped. Our composite  
1346 analysis method accounts for clusters which either had incomplete crossover and or did not  
1347 crossover. However, the lower sample size and unequal cluster sizes decreases the precision  
1348 of the outcome estimates. Since we used cluster weighted estimates to account for unequal  
1349 cluster sizes and increased the initial sample size by 27% above the minimum required, the  
1350 loss of precision will be mitigated. The trial was stopped based on the Haybittle-Peto

1351 boundary of 0.001, so we anticipate the final analysis using 95% confidence intervals will  
 1352 have sufficient power.

1353

1354

1355 **Table 3.** Outcomes for population 1

| Outcome                                            | LMWH Allocation (n = X) | Aspirin Allocation (n = X) | Absolute Risk Difference | 95% Confidence Interval | p-value |
|----------------------------------------------------|-------------------------|----------------------------|--------------------------|-------------------------|---------|
| <b>Any Venous thromboembolism</b>                  | n (%)                   | n (%)                      | X                        | X - X                   |         |
| <b>Type of Venous thromboembolism</b>              |                         |                            |                          |                         |         |
| Pulmonary embolism                                 | n (%)                   | n (%)                      | X                        | X - X                   |         |
| Deep venous thrombosis                             | n (%)                   | n (%)                      | X                        | X - X                   |         |
| Both Pulmonary embolism and deep venous thrombosis | n (%)                   | n (%)                      | X                        | X - X                   |         |
| Above knee deep venous thrombosis                  | n (%)                   | n (%)                      | X                        | X - X                   |         |
| Below knee deep venous thrombosis                  | n (%)                   | n (%)                      | X                        | X - X                   |         |
| Death                                              | n (%)                   | n (%)                      | X                        | X - X                   |         |
| Re-operation (90d)                                 | n (%)                   | n (%)                      | X                        | X - X                   |         |
| Reoperation (6 months)                             | n (%)                   | n (%)                      | X                        | X - X                   |         |
| Re-admission                                       | n (%)                   | n (%)                      | X                        | X - X                   |         |
| Major Bleeding                                     | n (%)                   | n (%)                      | X                        | X - X                   |         |
| Pain and Function (median and IQR) <sup>†</sup>    |                         |                            | X                        | X - X                   |         |
| Oxford Hip Score                                   | X (X - X)               | X (X - X)                  | X                        | X - X                   |         |
| Oxford Knee Score                                  | X (X - X)               | X (X - X)                  | X                        | X - X                   |         |
| EQ-5D                                              | X (X - X)               | X (X - X)                  | X                        | X - X                   |         |
| EQ-VAS                                             | X (X - X)               | X (X - X)                  | X                        | X - X                   |         |

1356

1357 <sup>†</sup> at 6 months

1358

1359

1360 **Figure 4.** Between group change in overall 90-day symptomatic VTE rate and non-inferiority margin. The dotted line represents the non-inferiority margin

1361

1362

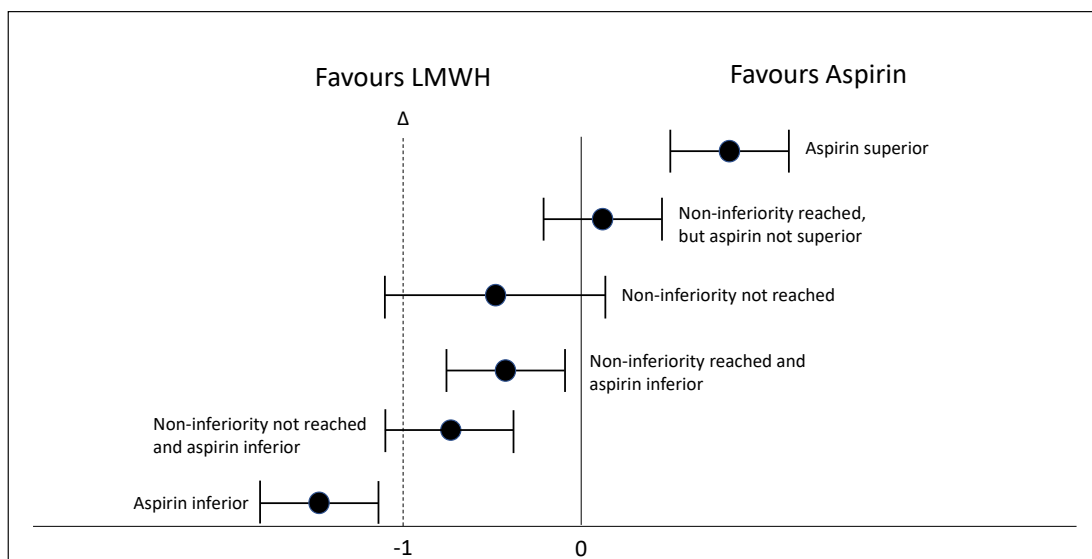

1363

1364

1365 **Table 4. Outcomes for populations 2, 3 and 4**

| Population                                                                          | Outcome                                            | LMWH Allocation (n = X) | Aspirin Allocation (n = X) | Absolute Risk Difference | 95% Confidence Interval | p-value |
|-------------------------------------------------------------------------------------|----------------------------------------------------|-------------------------|----------------------------|--------------------------|-------------------------|---------|
| All primary THA/TKA for any diagnosis eligible to receive study drug (population 2) | <b>Any Venous thromboembolism</b>                  | n (%)                   | n (%)                      | X                        | X – X                   |         |
|                                                                                     | <b>Type of Venous thromboembolism</b>              |                         |                            |                          |                         |         |
|                                                                                     | Pulmonary embolism                                 | n (%)                   | n (%)                      | X                        | X – X                   |         |
|                                                                                     | Deep venous thrombosis                             | n (%)                   | n (%)                      | X                        | X – X                   |         |
|                                                                                     | Both Pulmonary embolism and deep venous thrombosis | n (%)                   | n (%)                      | X                        | X – X                   |         |
|                                                                                     | Above knee deep venous thrombosis                  | n (%)                   | n (%)                      | X                        | X – X                   |         |
|                                                                                     | Below knee deep venous thrombosis                  | n (%)                   | n (%)                      | X                        | X – X                   |         |
|                                                                                     | Death                                              | n (%)                   | n (%)                      | X                        | X – X                   |         |
|                                                                                     | Re-operation (90d)                                 | n (%)                   | n (%)                      | X                        | X – X                   |         |
|                                                                                     | Reoperation (6 months)                             | n (%)                   | n (%)                      | X                        | X – X                   |         |
|                                                                                     | Re-admission                                       | n (%)                   | n (%)                      | X                        | X – X                   |         |
|                                                                                     | Major Bleeding                                     | n (%)                   | n (%)                      | X                        | X – X                   |         |
|                                                                                     | Pain and Function (median and IQR) <sup>†</sup>    |                         |                            |                          |                         |         |
| Oxford Hip Score                                                                    |                                                    |                         | X                          | X – X                    |                         |         |
| Oxford Knee Score                                                                   | X (X – X)                                          | X (X – X)               | X                          | X – X                    |                         |         |
| EQ-5D                                                                               | X (X – X)                                          | X (X – X)               | X                          | X – X                    |                         |         |
| EQ-VAS                                                                              | X (X – X)                                          | X (X – X)               | X                          | X – X                    |                         |         |
| X (X – X)                                                                           | X (X – X)                                          | X (X – X)               |                            |                          |                         |         |
| All HA/KA eligible to receive study drug (population 3)                             | <b>Any Venous thromboembolism</b>                  | n (%)                   | n (%)                      | X                        | X – X                   |         |
|                                                                                     | <b>Type of Venous thromboembolism</b>              |                         |                            |                          |                         |         |
|                                                                                     | Pulmonary embolism                                 | n (%)                   | n (%)                      | X                        | X – X                   |         |
|                                                                                     | Deep venous thrombosis                             | n (%)                   | n (%)                      | X                        | X – X                   |         |
|                                                                                     | Both Pulmonary embolism and deep venous thrombosis | n (%)                   | n (%)                      | X                        | X – X                   |         |
|                                                                                     | Above knee deep venous thrombosis                  | n (%)                   | n (%)                      | X                        | X – X                   |         |
|                                                                                     | Below knee deep venous thrombosis                  | n (%)                   | n (%)                      | X                        | X – X                   |         |
|                                                                                     | Death                                              | n (%)                   | n (%)                      | X                        | X – X                   |         |
|                                                                                     | Re-operation (90d)                                 | n (%)                   | n (%)                      | X                        | X – X                   |         |
|                                                                                     | Reoperation (6 months)                             | n (%)                   | n (%)                      | X                        | X – X                   |         |
|                                                                                     | Re-admission                                       | n (%)                   | n (%)                      | X                        | X – X                   |         |
|                                                                                     | Major Bleeding                                     | n (%)                   | n (%)                      | X                        | X – X                   |         |
|                                                                                     | Pain and Function (median and IQR) <sup>†</sup>    |                         |                            |                          |                         |         |
| Oxford Hip Score                                                                    |                                                    |                         | X                          | X – X                    |                         |         |
| Oxford Knee Score                                                                   | X (X – X)                                          | X (X – X)               | X                          | X – X                    |                         |         |
| EQ-5D                                                                               | X (X – X)                                          | X (X – X)               | X                          | X – X                    |                         |         |
| EQ-VAS                                                                              | X (X – X)                                          | X (X – X)               | X                          | X – X                    |                         |         |
| X (X – X)                                                                           | X (X – X)                                          | X (X – X)               |                            |                          |                         |         |
| All HA/KA including study drug exclusion (population 4)                             | <b>Any Venous thromboembolism</b>                  | n (%)                   | n (%)                      | X                        | X – X                   |         |
|                                                                                     | <b>Type of Venous thromboembolism</b>              |                         |                            |                          |                         |         |
|                                                                                     | Pulmonary embolism                                 | n (%)                   | n (%)                      | X                        | X – X                   |         |
|                                                                                     | Deep venous thrombosis                             | n (%)                   | n (%)                      | X                        | X – X                   |         |
|                                                                                     | Both Pulmonary embolism and deep venous thrombosis | n (%)                   | n (%)                      | X                        | X – X                   |         |
|                                                                                     | Above knee deep venous thrombosis                  | n (%)                   | n (%)                      | X                        | X – X                   |         |
|                                                                                     | Below knee deep venous thrombosis                  | n (%)                   | n (%)                      | X                        | X – X                   |         |
|                                                                                     | Death                                              | n (%)                   | n (%)                      | X                        | X – X                   |         |
|                                                                                     | Re-operation (90d)                                 | n (%)                   | n (%)                      | X                        | X – X                   |         |
|                                                                                     | Reoperation (6 months)                             | n (%)                   | n (%)                      | X                        | X – X                   |         |
|                                                                                     | Re-admission                                       | n (%)                   | n (%)                      | X                        | X – X                   |         |
|                                                                                     | Major Bleeding                                     | n (%)                   | n (%)                      | X                        | X – X                   |         |
|                                                                                     | Pain and Function (median and IQR) <sup>†</sup>    |                         |                            |                          |                         |         |
| Oxford Hip Score                                                                    |                                                    |                         | X                          | X – X                    |                         |         |
| Oxford Knee Score                                                                   | X (X – X)                                          | X (X – X)               | X                          | X – X                    |                         |         |
| EQ-5D                                                                               | X (X – X)                                          | X (X – X)               | X                          | X – X                    |                         |         |
| EQ-VAS                                                                              | X (X – X)                                          | X (X – X)               | X                          | X – X                    |                         |         |
| X (X – X)                                                                           | X (X – X)                                          | X (X – X)               |                            |                          |                         |         |

1366

1367 <sup>†</sup> at 6 months

1368

1369

1370 **Subgroup Analyses**

1371 Subgroup analyses for the primary outcome (treatment group differences by subgroup) will  
1372 include THA or TKA, bilateral or unilateral procedures, a prior history of VTE or not for  
1373 population 1, and primary arthroplasty or revision arthroplasty for population 3.

1374

1375 To assess treatment effects for each subgroup separately, cluster summaries will be  
1376 produced for each subgroup. An interaction term between treatment group and subgroup  
1377 (e.g., THA/TKA, bilateral/unilateral) will be added to the model for the primary outcome.  
1378 The treatment differences for each subgroup will be assessed for non-inferiority. Since the  
1379 trial was stopped early, the same composite method for the primary outcome and interim  
1380 analyses will be used.

1381

1382 **Sensitivity analyses**

1383 Sensitivity analyses will be performed to determine: (a) the effect of high-volume  
1384 arthroplasty sites; (b) sites with high and low overall registration rates; (c) sites that  
1385 required multiple compliance audits; and (d) the effect of patients who take long-term  
1386 aspirin therapy on the results of the analyses for the primary outcome in population 1. The  
1387 same methods for the main analyses will be used.

1388

1389 **Order of planned analyses**

1390 Analyses will be performed in the following order:

1391

- Interim analyses of population 1
- Primary and secondary outcomes for population 1
- Subgroup analyses for population 1
- Primary and secondary outcomes for populations 2, 3 and 4
- Subgroup analyses of population 3
- Sensitivity analyses in population 1

1392

1393

1394

1395

1396

1397

1398

1399 **ADDITIONAL ANALYSES**

1400

1401 **Mortality Analysis**

1402 In addition to analysing between-group mortality for populations 1, 2, 3 and 4, the between-  
1403 group 90-day mortality will be analysed for two further populations:

- 1404 3. All patients undergoing HA or KA over the duration of the study at participating  
1405 hospitals, regardless of whether they were registered (total population described  
1406 above, population 5)
- 1407 4. All patients undergoing elective THA or TKA over the duration of the study at  
1408 participating hospitals regardless of whether they were registered (a subset of  
1409 population 5)

1410

1411 Analysing these additional populations will assess the effect of implementing the VTE  
1412 prophylaxis protocol on mortality at an institutional/departmental level (the unit of  
1413 randomisation), on an intention-to-treat basis.

1414

1415 **Sub-Studies**

1416 Data from this trial will be used to form the basis of sub-studies. These will include a sub-  
1417 study comparing rates of persistent wound drainage between LMWH and aspirin groups at  
1418 two participating sites and a sub-study investigating rates of post-hospital discharge  
1419 compliance to either study drug.

1420

1421

1422

1423 **Conclusions**

1424 CRISTAL aims to provide much needed definitive evidence about the effectiveness and

1425 safety of aspirin compared to LMWH in preventing symptomatic VTE following HA or KA.

1426 This statistical analysis plan details the study's planned analyses, including modifications to  
1427 intended analyses to account for early stopping of the trial.

1428

1429

1430

1431 **DECLARATIONS**

1432

1433 **Ethics Approval**

1434 Ethics approval was granted by the Sydney Local Health District (Royal Prince Alfred Zone)  
1435 Human Research and Ethics Committee, which is a lead ethics committee in Australia  
1436 (approval number X18-0424) prior to study commencement. Site-specific approvals for each  
1437 participating hospital were granted from the following ethics committees prior to study  
1438 commencement: Calvary John James Memorial Hospital Australian Capital Territory (3-2019  
1439 CRISTAL), Mid-North Coast Local Health District New South Wales (NSW – SSA/19/NCC/41),  
1440 South Western Sydney Local Health District (NSW, SSA/10/LPOOL/22), Sydney Local Health  
1441 District (NSW, SSA/19/RPAH/12, SSA/18/RPAH/762), Ramsay Hospital Research Foundation  
1442 (NSW, HREC/18/RPAH/603), South Eastern Sydney Local Health District (NSW, 19/G/028,  
1443 18/G/338), Nepean Blue Mountains Local Health District (NSW, SSA/19/NEPAN/11),  
1444 Northern Sydney Local Health District (NSW, RESP/19/027, RESP/19/028), Metro North  
1445 Hospital and Health Service (Queensland, HREC/18/RPAH/603), University of South Australia  
1446 (SA – 201215), Calvary Health Care Adelaide (SA, 19-CHREC-F001), Southern Adelaide Local  
1447 Health Network (SA, HREC/18/RPAH/603), Bendigo Health Victoria (SSA/48255/BHCG-2019),  
1448 Barwon Health (18/246), Peninsula Health Victoria (SSA/48255/PH-2019), Western Health  
1449 Victoria (48255), St John of God Health Care Victoria (1540), South Metropolitan Health  
1450 Western Australia (WA – Western Australia, RGS0000001358), North Metropolitan Health  
1451 (WA – RGS0000001358), Sir Charles Gardiner Hospital (WA – RGS0000001358) and  
1452 Launceston General Hospital Tasmania (H0017903).

1453

1454 **Consent for publication**

1455 Not applicable.

1456 **Availability of data and materials**

1457 The datasets during and/or analysed during the current study will be made available from  
1458 the corresponding author on reasonable request

1459 **Competing interests**

1460 The authors declare that they have no competing interests

1461 **Funding**

1462 The study is being funded by a four-year Medical Research Futures Fund (MRFF – Australian  
1463 Federal Government) grant. The funding was not provided with any conditions and the  
1464 MRFF has no authority over the design of the study or collection, management, analysis or  
1465 interpretation of data or the writing of manuscripts for submission. No industry funding or  
1466 other sources of funding are being used for this trial.

1467 **Authors' contributions**

1468 All authors listed have contributed to this protocol and the ICMJE guidelines were consulted  
1469 for determining authorship. VS, IAH, RB, SG, SA, JMN, RdS, NP, INA, ML, DB, KC and TLK  
1470 were responsible for the planning of the trial, protocol development and writing, TLK and



1471 NP were responsible for the description of the statistical analyses used. All authors  
1472 reviewed the final version of this manuscript prior to submission.

1473

1474

1475 **Acknowledgements**

1476 Not applicable.

1477

1478 **REFERENCES**

1479

- 1480 1. Mirkazemi C, Bereznicki LR, Peterson GM. Comparing Australian orthopaedic  
1481 surgeons' reported use of thromboprophylaxis following arthroplasty in 2012 and  
1482 2017. *BMC Musculoskelet Disord.* 2019;20:57.
- 1483 2. Adam SS, McDuffie JR, Lachiewicz PF, Ortel TL, Williams JW, Jr. Comparative  
1484 effectiveness of new oral anticoagulants and standard thromboprophylaxis in  
1485 patients having total hip or knee replacement: a systematic review. *Ann Intern Med.*  
1486 2013;159:275-84.
- 1487 3. Gomez-Outes A, Terleira-Fernandez AI, Suarez-Gea ML, Vargas-Castrillon E.  
1488 Dabigatran, rivaroxaban, or apixaban versus enoxaparin for thromboprophylaxis  
1489 after total hip or knee replacement: systematic review, meta-analysis, and indirect  
1490 treatment comparisons. *BMJ.* 2012;344:e3675.
- 1491 4. Cao YB, Zhang JD, Shen H, Jiang YY. Rivaroxaban versus enoxaparin for  
1492 thromboprophylaxis after total hip or knee arthroplasty: a meta-analysis of  
1493 randomized controlled trials. *Eur J Clin Pharmacol.* 2010;66:1099-108.
- 1494 5. Cohen A, Drost P, Marchant N, Mitchell S, Orme M, Rublee D, et al. The efficacy and  
1495 safety of pharmacological prophylaxis of venous thromboembolism following  
1496 elective knee or hip replacement: systematic review and network meta-analysis. *Clin*  
1497 *Appl Thromb Hemost.* 2012;18:611-27.
- 1498 6. Harenberg J, Marx S, Dahl OE, Marder VJ, Schulze A, Wehling M, et al. Interpretation  
1499 of endpoints in a network meta-analysis of new oral anticoagulants following total  
1500 hip or total knee replacement surgery. *Thromb Haemost.* 2012;108:903-12.
- 1501 7. Neumann I, Rada G, Claro JC, Carrasco-Labra A, Thorlund K, Akl EA, et al. Oral direct  
1502 Factor Xa inhibitors versus low-molecular-weight heparin to prevent venous  
1503 thromboembolism in patients undergoing total hip or knee replacement: a  
1504 systematic review and meta-analysis. *Ann Intern Med.* 2012;156:710-9.
- 1505 8. Turun S, Banghua L, Yuan Y, Zhenhui L, Ying N, Jin C. A systematic review of  
1506 rivaroxaban versus enoxaparin in the prevention of venous thromboembolism after  
1507 hip or knee replacement. *Thromb Res.* 2011;127:525-34.
- 1508 9. Bozic KJ, Vail TP, Pekow PS, Maselli JH, Lindenauer PK, Auerbach AD. Does aspirin  
1509 have a role in venous thromboembolism prophylaxis in total knee arthroplasty  
1510 patients? *J Arthroplasty.* 2010;25:1053-60.
- 1511 10. Jameson SS, Baker PN, Charman SC, Deehan DJ, Reed MR, Gregg PJ, et al. The effect  
1512 of aspirin and low-molecular-weight heparin on venous thromboembolism after  
1513 knee replacement: a non-randomised comparison using National Joint Registry Data.  
1514 *J Bone Joint Surg Br.* 2012;94:914-8.
- 1515 11. Jameson SS, Charman SC, Gregg PJ, Reed MR, van der Meulen JH. The effect of  
1516 aspirin and low-molecular-weight heparin on venous thromboembolism after hip  
1517 replacement: a non-randomised comparison from information in the National Joint  
1518 Registry. *J Bone Joint Surg Br.* 2011;93:1465-70.
- 1519 12. Anderson DR, Dunbar M, Murnaghan J, Kahn SR, Gross P, Forsythe M, et al. Aspirin  
1520 or Rivaroxaban for VTE Prophylaxis after Hip or Knee Arthroplasty. *N Engl J Med.*  
1521 2018;378:699-707.
- 1522 13. Anderson DR, Dunbar MJ, Kahn SR. Aspirin versus low-molecular-weight heparin  
1523 after total hip arthroplasty. *Ann Intern Med.* 2013;159:502-3.

1524 14. Campbell MK, Piaggio G, Elbourne DR, Altman DG, Group C. Consort 2010 statement:  
1525 extension to cluster randomised trials. *BMJ*. 2012;345:e5661.

1526 15. Sidhu VS, Graves SE, Buchbinder R, Naylor JM, Pratt NL, de Steiger RS, et al. CRISTAL:  
1527 protocol for a cluster randomised, crossover, non-inferiority trial of aspirin  
1528 compared to low molecular weight heparin for venous thromboembolism  
1529 prophylaxis in hip or knee arthroplasty, a registry nested study. *BMJ Open*.  
1530 2019;9:e031657.

1531 16. [<https://www.sealedenvelope.com>]

1532 17. Bjornara BT, Gudmundsen TE, Dahl OE. Frequency and timing of clinical venous  
1533 thromboembolism after major joint surgery. *J Bone Joint Surg Br*. 2006;88:386-91.

1534 18. Kulshrestha V, Kumar S. DVT prophylaxis after TKA: routine anticoagulation vs risk  
1535 screening approach - a randomized study. *J Arthroplasty*. 2013;28:1868-73.

1536 19. Bawa H, Weick JW, Dirschl DR, Luu HH. Trends in Deep Vein Thrombosis Prophylaxis  
1537 and Deep Vein Thrombosis Rates After Total Hip and Knee Arthroplasty. *J Am Acad*  
1538 *Orthop Surg*. 2018;26:698-705.

1539 20. Giraudeau B, Ravaud P, Donner A. Sample size calculation for cluster randomized  
1540 cross-over trials. *Stat Med*. 2008;27:5578-85.

1541 21. Kelly T-L, Pratt N. A note on sample size calculations for cluster randomised  
1542 crossover trials with a fixed number of clusters. *Stat Med*. 2019;38:3342-5.

1543 22. AOA. Australian Orthopaedic Association National Joint Replacement Registry  
1544 Annual Report. 2019;

1545 23. Peto R, Pike MC, Armitage P, Breslow NE, Cox DR, Howard SV, et al. Design and  
1546 analysis of randomized clinical trials requiring prolonged observation of each patient.  
1547 I. Introduction and design. *Br J Cancer*. 1976;34:585-612.

1548 24. Haybittle JL. Repeated assessment of results in clinical trials of cancer treatment. *Br J*  
1549 *Radiol*. 1971;44:793-7.

1550 25. Forbes AB, Akram M, Pilcher D, Cooper J, Bellomo R. Cluster randomised crossover  
1551 trials with binary data and unbalanced cluster sizes: application to studies of near-  
1552 universal interventions in intensive care. *Clin Trials*. 2015;12:34-44.

1553 26. Turner RM, White IR, Croudace T, Group PIPS. Analysis of cluster randomized cross-  
1554 over trial data: a comparison of methods. *Stat Med*. 2007;26:274-89.

1555 27. White IR, Daniel R, Royston P. Avoiding bias due to perfect prediction in multiple  
1556 imputation of incomplete categorical variables. *Comput Stat Data Anal*.  
1557 2010;54:2267-75.

1558 28. Rodwell L, Lee KJ, Romaniuk H, Carlin JB. Comparison of methods for imputing  
1559 limited-range variables: a simulation study. *BMC Med Res Methodol*. 2014;14:57.

1560 29. Hughes RA, Heron J, Sterne JAC, Tilling K. Accounting for missing data in statistical  
1561 analyses: multiple imputation is not always the answer. *Int J Epidemiol*.  
1562 2019;48:1294-304.

1563 30. Schumi J, Wittes JT. Through the looking glass: understanding non-inferiority. *Trials*.  
1564 2011;12:106.

1565  
1566  
1567  
1568  
1569  
1570

1571 **CRISTAL: Aspirin or LMWH for VTE Prophylaxis After Hip or Knee Arthroplasty**

1572

1573

1574 **Historical Summary of Amendments for Statistical Analysis Plan**

1575

1576

1577 **Previous Statistical Analysis (In Protocol): 29 October 2020**

1578

1579 **Updated in Initial Statistical Analysis Plan: 14 May 2021**

1580

1581 **AMENDMENT 1 – Changes from Protocol to Initial Statistical Analysis Plan**

1582

1583

1584 1. **ITEM: STUDY OVERVIEW – Outcome Variables.** Change in time point for secondary  
1585 outcome of mortality as written in protocol

1586 **CHANGE:** Mortality to be measured at 90 days only, not at 90 days and 6 months

1587 **RATIONALE:** Due to the lack of sensitivity in measuring VTE-related mortality at 6  
1588 months and due to the lag in data availability for mortality, we changed the analysis  
1589 to measure mortality at 90 days only

1590 2. **ITEM: MAIN ANALYSES**

1591 **CHANGE:** Inclusion of composite analysis method to account for incomplete  
1592 crossover

1593 **RATIONALE:** After the interim analyses demonstrated that the stopping rule had  
1594 been met, a composite analysis method was required given that a number of sites  
1595 had not completed crossover

1596 3. **ITEM: MAIN ANALYSES – Subgroup Analyses.**

1597 **CHANGE:** Addition of patients with a prior history of VTE or not and of patients on  
1598 long-term single antiplatelet therapy as subgroup analyses (not previously in study  
1599 protocol)

1600 **RATIONALE:** Given this data was collected preoperatively, the senior author (IAH),  
1601 corresponding author (VS), lead statistician (TLK) and senior statistician (NP) decided  
1602 to add these subgroup analyses

1603 4. **ITEM: MAIN ANALYSES – Subgroup Analyses.**

1604 **CHANGE:** Clarification of the method used for subgroup analyses (using summaries  
1605 by cluster and subgroup and an interaction term)

1606 **RATIONALE:** Methods used for subgroup analyses added to initial version of  
1607 statistical analysis plan

1608 5. **ITEM: MAIN ANALYSES – Sensitivity Analyses.**

1609 **CHANGE:** Addition of sensitivity analyses to determine: (a) the effect of high-volume  
1610 arthroplasty sites; (b) sites with high and low overall registration rates; (c) sites that  
1611 required multiple compliance audits and method used for sensitivity analyses  
1612 provided (same as subgroup analyses)

1613 **RATIONALE:** To determine if the results for the primary outcome were consistent  
1614 amongst sites despite variations in the above parameters. Addition of methods used  
1615 for sensitivity analyses

1616 6. **ITEM:** MAIN ANALYSES – Order of Analyses

1617 **CHANGE:** Order of planned analyses changed to include interim analyses and  
1618 specification of the Haybittle-Peto threshold

1619 **RATIONALE:** The initial statistical analyses in the protocol did not include the interim  
1620 analysis and this was included in the initial version of the statistical analysis plan

1621

1622

1623

1624  
1625  
1626  
1627  
1628  
1629  
1630  
1631  
1632  
1633  
1634  
1635  
1636  
1637  
1638  
1639  
1640  
1641  
1642  
1643  
1644  
1645  
1646  
1647  
1648  
1649  
1650  
1651  
1652  
1653  
1654  
1655  
1656  
1657  
1658  
1659  
1660  
1661  
1662  
1663

**Previous Statistical Analysis Plan (Initial): 14 May 2021**

**Updated in Statistical Analysis Plan (Final): 20 July 2021**

**AMENDMENT 2 – Changes from Initial Statistical Analysis Plan to Final Statistical Analysis Plan**

1. **ITEM:** STATISTICAL ANALYSIS PLAN – Methods used for Interim Analyses  
**CHANGE:** Addition of using harmonic mean weighting as a method to account for unequal cluster sizes  
**RATIONALE:** Given early trial cessation and unequal cluster sizes, further information provided on how unequal cluster sizes were analysed
2. **ITEM:** STATISTICAL ANALYSIS PLAN – Methods for handling missing data  
**CHANGE:** Addition of methods used for multiple imputation, “The imputation model will use auxiliary variables gathered from routine AOANJRR data (including age, sex, baseline health, pain and function, diagnosis and surgical factors), as well as cluster and period effects. One hundred datasets will be imputed at the patient level, then each dataset will be analysed using the main analysis method with cluster summaries and combined using Rubin’s rules.”  
**RATIONALE:** More in-depth description provided to account for clustering
3. **ITEM:** STATISTICAL ANALYSIS PLAN – Methods for handling missing data  
**CHANGE:** Addition of the use of inverse probability weighting as a sensitivity analysis for the primary outcome to handle missing data  
**RATIONALE:** An additional method (to that of multiple imputation) to account for missing data
4. **ITEM:** STATISTICAL ANALYSIS PLAN – Trial and baseline characteristics  
**CHANGE:** Addition of demographic information to Table 1 for participating hospitals (clusters) – number of joint replacements performed in year preceding trial, insurance status  
**RATIONALE:** Prior to this, there was no demographic description of participating clusters, only numbers registered by each hospital
5. **ITEM:** MAIN ANALYSES: Analyses of primary and secondary outcomes  
**CHANGE:** Description of composite methods used (cluster weighted estimates) for primary and secondary outcomes  
**RATIONALE:** To explain methods used to mitigate bias and any possible loss of precision from sites that had incomplete crossover or did not crossover
