# Supplementary material
Source: PubMed Central journal article supplement (PMC9399863)
Supplement: jama-e2213416-s003.pdf [file jama-e2213416-s003.pdf]

## Supplemental Online Content

CRISTAL Study Group. Effect of aspirin vs enoxaparin on symptomatic venous thromboembolism in patients undergoing hip or knee arthroplasty: the CRISTAL randomized trial. *JAMA*. Published August 23, 2022. doi:10.1001/jama.2022.13416

**eAppendix 1.** Collaborators and Participating Institutions

**eAppendix 2.** Letter Recommending Early Trial Cessation

**eAppendix 3.** Results of Second Interim Analysis

**eAppendix 4.** Second Interim Analysis – Update on Patients With a Reported History of VTE

**eAppendix 5.** Minutes From Meeting to Unblind Investigators

**eAppendix 6.** Audit Process for Inpatient Adherence

**eAppendix 7.** Audit Process for Post-discharge Adherence

**eAppendix 8.** Audit Process for “Absence” of VTE Audit

**eFigure.** Non-inferiority Diagram for Primary Outcome

**eTable 1.** Baseline Features of Participating Clusters

**eTable 2.** Comparison of Enrolled and Non-enrolled Patients

**eTable 3.** Sensitivity Analyses

**eTable 4.** Comparison of Complete Case and Imputed Analyses for Primary Outcome

**eTable 5.** Comparison of Complete Case and Imputed Analyses for Secondary Outcomes

**eTable 6.** Comparison of Complete Case and Imputed Analyses for Subgroup Analyses

This supplemental material has been provided by the authors to give readers additional information about their work.

## **eAppendix1. Collaborators and Participating Institutions**

### **Study Investigators**

In addition to the authors listed in the writing group, the following authors were a part of the study investigators' group: Justine Maree Naylor, Ilana Ackerman, Beng Hock Cheng, Richard de Steiger, Anthony Harris, Michelle Lorimer, Elizabeth C. Griffith, Steve Webb, Durga Bastiras, Maggie Cripps, Amber Hansen and Ornella Clavisi.

### **Site investigators**

In addition to the authors listed in the writing group and the study investigators, the following authors were site investigators (sites are listed in italics): *Prince of Wales Hospital, Randwick, Sydney, New South Wales, Australia* – Michael Solomon, *Fairfield Hospital, Fairfield, Sydney, New South Wales, Australia* – David Lieu, *Canterbury Hospital, Canterbury, Sydney, New South Wales, Australia* – Leonard Kuo, *Nepean Hospital, Nepean, Sydney, New South Wales, Australia* – Rami Sorial, *Coffs Harbour Base Hospital, Coffs Harbour, New South Wales, Australia* – Peter Summersell, *Lakeview Private Hospital, Baulkam Hills, Sydney, New South Wales, Australia* and *Westmead Private Hospital, Westmead, Sydney, New South Wales, Australia* – Roger Brighton, *The Institute of Rheumatology and Orthopaedics, Royal Prince Alfred Hospital, Sydney, New South Wales, Australia* – Mark Horsley, *St George Private Hospital, St George, Sydney, New South Wales, Australia* – Samuel Macdessi, *Kareena Private Hospital, Sutherland, Sydney, New South Wales, Australia* – Michael Dixon, *Hornsby Hospital, Hornsby, Sydney, New South Wales, Australia* – David Hale, *North Shore Public Hospital, St Leonards, Sydney, New South Wales, Australia* – Bill Walter, *North Shore Private Hospital, St Leonards, Sydney, New South Wales, Australia* – Andrew Ellis, *Calvary John James Hospital, Deakin, Canberra, Australian Capital Territory, Australia* – Alexander Burns, *Greenslopes Private Hospital, Greenslopes, Brisbane, Queensland, Australia* – Mark Dekkers, *Mater Hospital Brisbane, Raymond Terrace, Brisbane, Queensland, Australia* – John Radavanovic, *Prince Charles Hospital, Chermside, Brisbane, Queensland, Australia* – Catherine McDougall, *Calvary Adelaide Hospital, Adelaide, South Australia, Australia* – Peter Lewis, *Flinders Medical Centre, Bedford Park, Adelaide, South Australia, Australia* – Chris Wilson, *Launceston General Hospital, Launceston, Tasmania, Australia* – Jonathan Mulford, *Bendigo Hospital, Bendigo, Victoria, Australia* – Dugal James, *Epworth Eastern Hospital, Box Hill, Melbourne, Victoria, Australia* – Raphael Hau, *Footscray Hospital, Footscray, Melbourne, Victoria, Australia* and *Williamstown Hospital, Williamstown, Melbourne, Victoria, Australia* – Phong Tran, *Frankston Hospital, Frankston, Melbourne, Victoria, Australia* – Peter McCombe, *St John of God Hospital Geelong, Geelong, Victoria, Australia* and *University Hospital Geelong (Barwon Hospital), Geelong, Victoria, Australia* – Richard Page, *Fremantle Hospital, Fremantle, Perth, Western Australia, Australia* – Omar Khorshid, *Sir Charles Gardiner Hospital, Nedlands, Perth, Western Australia, Australia* and *Osborn Park Hospital, Stirling, Perth, Western Australia, Australia* – David Wysocki.

### **Steering Committee:**

I.A. Harris (Chair), the writing group and all investigators listed in section 1 of this appendix. Responsible for final protocol approval, study oversight and principal publication approval

Writing Group:

V.S. Sidhu, TL Kelly, N. Pratt, K. Cashman, S.E. Graves, R. Buchbinder, S. Adie, I.A. Harris.  
Responsible for protocol development and preparation of principal publication

Trial Management Committee:

I.A. Harris, S.E. Graves, V.S. Sidhu, S. Adie, D. Bastiras, C. Turner, E.C. Griffith, R. de Steiger, M. Lorimer, N. Pratt. Responsible for integration with AOANJRR patient reported outcome measures program, ethics approval and ethics issues that arose during the trial and site liaison (recruitment, auditing and maintenance).

Data Quality Committee:

I.A. Harris, D. Bastiras, M. Lorimer, R. de Steiger. Responsible for data management.

Outcome Verification Committee

J.M. Naylor, I.A. Harris, B.H. Cheng, D. Bastiras. Responsible for process of validation verification of venous thromboembolic events during follow-up

Data Safety Monitoring Board:

L. Billot (senior statistician), A. Tuckfield (hematologist) and C. Vertullo (orthopedic surgeon). Responsible for blinded interim analyses.

## eAppendix 2. Letter Recommending Early Trial Cessation

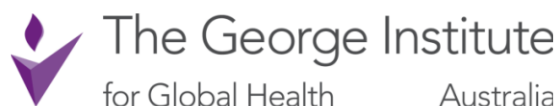

Associate Professor Laurent Billot  
The George Institute for Global Health  
ABN 90 085 953 331

Level 5, 1 King Street  
Newtown NSW 2042  
AUSTRALIA

T: +61 414 571 031  
[lbillot@georgeinstitute.org](mailto:lbillot@georgeinstitute.org)  
[www.georgeinstitute.org](http://www.georgeinstitute.org)

16 December 2020

**Re: CRISTAL DSMB Recommendations**

Dear Professor Harris,

The DSMB met on 9 December 2020 to review the Interim report. The report included primary outcome data (VTE within 90 days) related to 8,296 procedures undertaken before 31 July 2020 with follow-up until 30 October 2020.

The primary analysis comparing the proportion of patients experiencing VTE showed a strongly significant difference between the two arms with the 99.90% confidence interval around this difference excluding zero. This interim finding therefore crosses the pre-specified boundary which corresponds to a level of significance of 0.1%. This excess of harm in one arm appears to be consistent across sites as reviewed in a subsequent report.

There was no evidence of a difference for any of the other outcomes including major bleeding, death and further surgery. Baseline characteristics were well balanced between the two randomised arms.

Given the strong sign of harm, as indicated by a significant difference in the proportion of patients experiencing VTE ( $p$ -value < 0.001) and the absence of any noticeable differences in other outcomes, we recommend that the trial be stopped. In parallel, we strongly recommend that patients with a prior history of VTE be completely excluded from future enrolment in the trial given the additional risk in this subgroup.

We acknowledge that the results might change slightly as more hospitals cross over to the other arm; however, we are concerned that delaying the decision might put further participants at risk. We also believe that there is sufficient evidence to suggest that the primary non-inferiority hypothesis is now very unlikely.

We understand that the final decision rests with the study management committee and remain at your disposal to provide further guidance and / or discuss the findings in more details.

Sincerely,

A handwritten signature in black ink, appearing to be "L. Billot", written over a horizontal line.

A/Prof Laurent Billot, on behalf of the CRISTAL DSMB

Membership of the CRISTAL DSMB: Laurent Billot (Chair), Annabel Tuckfield, Chris Vertullo

Affiliated with

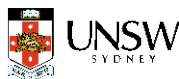

### **eAppendix 3. Results of Second Interim Analysis**

#### **CRISTAL - Interim Analysis Second Interim Analysis 25<sup>th</sup> November 2020**

##### **Background:**

The primary objective of the study is to determine whether aspirin is non-inferior to low molecular weight heparin (LMWH) in the prevention of symptomatic venous thromboembolism (VTE) occurring within 90-days in patients undergoing primary elective total hip arthroplasty (THA) or total knee arthroplasty (TKA) for osteoarthritis (OA). CRISTAL has been designed as a pragmatic, non-inferiority, cluster randomised crossover trial. Thirty-one hospitals across Australia are participating.

This interim analysis includes procedures up to and including 31 July 2020, giving 90-days follow-up to 31 October 2020. As of 31/7/2020, there were 12 hospitals that have crossed over to the second treatment arm. Of these, nine hospitals are in the 'AB' sequence and three are in the 'BA' sequence.

The following interim analysis was undertaken in response to a single death of one participant following a suspected VTE at one hospital. For the purposes of this interim analysis, the treatments were labelled A and B to preserve blinding. All analyses were performed for primary THA and TKA for OA.

The outcomes considered for analysis are:

- VTE occurring within 90-days among patients enrolled in CRISTAL
- VTE occurring within 90 days among patients enrolled in CRISTAL with a patient reported history of VTE
- Death within 90 days among patients enrolled in CRISTAL
- Death within 90 days among patients enrolled in CRISTAL with a patient reported history of VTE
- Major bleeding within 90-days among patients enrolled in CRISTAL
- Further surgery (any recorded) among patients enrolled in CRISTAL
- Readmission to hospital (any recorded) among patients enrolled in CRISTAL
- Death within 90-days for all procedures undertaken at CRISTAL hospitals by participating surgeons
- Revision surgery within 90-days for all procedures undertaken at CRISTAL hospitals by participating surgeons

Note that for the outcome of further surgery, no date of surgery is recorded, and this question is asked at both three- and six-months post operation. Therefore, this outcome is reporting any recorded and validated further surgery. The outcome of readmission to hospital is a combined outcome incorporating both further surgery

and readmission to hospital due to bleeding. This outcome is also reporting any recorded readmission to hospital, regardless of time since operation.

### **Method of Analysis:**

For each outcome, a summary proportion for each cluster was determined. For those hospitals that have crossed over, a linear regression of treatment differences on treatment sequence, weighted for cluster size, was performed as per Turner et. al. (2007). For those hospitals that have not crossed over, a linear regression was performed using the summary proportions. Results from the two models were combined using inverse variance weights and group differences (A -B) were calculated (Andrew Forbes, private communication, 25/8/2020). A significance level of 0.1% was chosen. Confidence Intervals presented are based on the Haybittle-Peto boundary.

### **Reference**

Turner RM, White IR, Croudace, T. 2007. Analysis of cluster randomized cross-over trial data: A comparison of methods. *Statistics in Medicine*. 26: 274-289

## Procedures enrolled in CRISTAL

### Baseline Demographic Summaries

**Table 1: Baseline Characteristics of Procedures Enrolled in CRISTAL**

| Characteristic |                   | A~(n=3858)        | B~(n=4438)        |
|----------------|-------------------|-------------------|-------------------|
| Age            | n                 | 3855              | 4424              |
|                | mean (SD)         | 67.2 (10.4)       | 66.4 (10.4)       |
|                | median (min, max) | 68.0 (18.0, 95.0) | 67.0 (18.0, 96.0) |
|                | median (Q1, Q3)   | 68.0 (61.0, 74.0) | 67.0 (60.0, 74.0) |
| BMI            | n                 | 3797              | 4371              |
|                | mean (SD)         | 31.0 (6.6)        | 31.2 (6.4)        |
|                | median (min, max) | 30.4 (15.7, 82.4) | 30.5 (14.6, 85.8) |
|                | median (Q1, Q3)   | 30.4 (26.5, 34.5) | 30.5 (26.8, 34.7) |
| Sex            | Male              | 1676 (43%)        | 1900 (43%)        |
|                | Female            | 2179 (57%)        | 2524 (57%)        |
|                | Missing           | 3                 | 14                |
| ASA            | 1                 | 213 (5.5%)        | 255 (5.8%)        |
|                | 2                 | 2136 (55%)        | 2512 (57%)        |
|                | 3                 | 1472 (38%)        | 1602 (36%)        |
|                | 4                 | 32 (0.8%)         | 39 (0.9%)         |
|                | Missing           | 5                 | 30                |
| Approach*      | Anterior          | 145 (9.8%)        | 328 (20%)         |
|                | Lateral           | 247 (17%)         | 186 (12%)         |
|                | Posterior         | 1085 (73%)        | 1096 (68%)        |
|                | Missing           | 1                 | 1                 |

\*Approach applies only to THA procedures

**Table 2: Baseline Characteristics of Primary Elective (THA and TKA for OA) Procedures Enrolled in CRISTAL**

| Characteristic |                   | A~(n=3394)        | B~(n=3922)        |
|----------------|-------------------|-------------------|-------------------|
| Age            | n                 | 3394              | 3922              |
|                | mean (SD)         | 67.6 (9.7)        | 67.0 (9.7)        |
|                | median (min, max) | 68.0 (18.0, 95.0) | 67.0 (23.0, 96.0) |
|                | median (Q1, Q3)   | 68.0 (61.0, 74.0) | 67.0 (60.0, 74.0) |
| BMI            | n                 | 3366              | 3879              |
|                | mean (SD)         | 31.2 (6.5)        | 31.4 (6.4)        |
|                | median (min, max) | 30.5 (15.7, 82.4) | 30.6 (15.2, 85.8) |
|                | median (Q1, Q3)   | 30.5 (26.8, 34.6) | 30.6 (27.0, 35.0) |
| Sex            | Male              | 1450 (43%)        | 1671 (43%)        |
|                | Female            | 1944 (57%)        | 2251 (57%)        |
| ASA            | 1                 | 183 (5.4%)        | 217 (5.6%)        |
|                | 2                 | 1902 (56%)        | 2248 (58%)        |
|                | 3                 | 1284 (38%)        | 1411 (36%)        |
|                | 4                 | 23 (0.7%)         | 33 (0.8%)         |
|                | Missing           | 2                 | 13                |
| Approach*      | Anterior          | 134 (10%)         | 303 (21%)         |
|                | Lateral           | 213 (16%)         | 159 (11%)         |
|                | Posterior         | 979 (74%)         | 1008 (69%)        |
|                | Missing           | 1                 | 0                 |

\*Approach applies only to THA procedures

### Group Comparison Results

**Table 3: VTE occurring within 90-days among patients enrolled in CRISTAL: Observed Means**

| Group | Number of Clusters | N Procedures | N 90-day VTE | Mean     | Std Error  |
|-------|--------------------|--------------|--------------|----------|------------|
| A     | 18                 | 3394         | 47           | 0.013848 | .001971349 |
| B     | 25                 | 3922         | 121          | 0.030852 | .004583925 |

**Table 4: VTE occurring within 90-days among patients enrolled in CRISTAL: Estimate of Group Difference**

| Group Difference | Cross Over Estimate | Cross Over SE | Parallel Estimate | Parallel SE | Combined Estimate | Combined Standard Error | Lower 99.99% CI | Upper 99.99% CI |
|------------------|---------------------|---------------|-------------------|-------------|-------------------|-------------------------|-----------------|-----------------|
| A - B            | -0.01892            | 0.006325      | -0.02239          | 0.01226     | -0.019652         | .005620773              | -0.038145       | -.001159889     |



**Table 5: VTE occurring within 90 days among patients enrolled in CRISTAL with a patient reported history of VTE: Observed Means**

| Group | Number of Clusters | N Procedures | N 90-day VTE | Mean     | Std Error |
|-------|--------------------|--------------|--------------|----------|-----------|
| A     | 18                 | 208          | 3            | 0.014423 | 0.006576  |
| B     | 25                 | 203          | 17           | 0.083744 | 0.015520  |

**Table 6: VTE occurring within 90 days among patients enrolled in CRISTAL with a patient reported history of VTE: Estimate of Group Difference**

| Group Difference | Cross Over Estimate | Cross Over SE | Parallel Estimate | Parallel SE | Combined Estimate | Combined Standard Error | Lower 99.95% CI | Upper 99.95% CI |
|------------------|---------------------|---------------|-------------------|-------------|-------------------|-------------------------|-----------------|-----------------|
| A - B            | -0.06853            | 0.03019       | -0.08791          | 0.03461     | -0.076904         | 0.022751                | -0.15175        | -.002053776     |

**Table 7: Death within 90 days among patients enrolled in CRISTAL: Observed Means**

| Group | Number of Clusters | N Procedures | N 90-day Mortality | Mean       | Std Error  |
|-------|--------------------|--------------|--------------------|------------|------------|
| A     | 18                 | 3394         | 3                  | .000883913 | .000424352 |
| B     | 25                 | 3922         | 4                  | .001019888 | .000406459 |

**Table 8: Death within 90 days among patients enrolled in CRISTAL: Estimate of Group Difference**

| Group Difference | Cross Over Estimate | Cross Over SE | Parallel Estimate | Parallel SE | Combined Estimate | Combined Standard Error | Lower 99.95% CI | Upper 99.95% CI |
|------------------|---------------------|---------------|-------------------|-------------|-------------------|-------------------------|-----------------|-----------------|
| A - B            | -0.00135            | 0.001250      | 0.000704          | 0.000967    | -.000064834       | .000764864              | -.002581236     | .002451567      |

**Table 9: Death within 90 days among patients enrolled in CRISTAL with a patient reported history of VTE: Observed Means**

| Group | Number of Clusters | N Procedures | N 90-day Mortality | Mean       | Std Error  |
|-------|--------------------|--------------|--------------------|------------|------------|
| A     | 18                 | 208          | .                  | 0          | 0          |
| B     | 25                 | 203          | 1                  | .004926108 | .004668506 |

Group differences not calculated due to there being only 1 death in total.

**Table 10: Major bleeding within 90-days among patients enrolled in CRISTAL: Observed Means**

| Group | Number of Clusters | N Procedures | N 90-day Major Bleed | Mean       | Std Error  |
|-------|--------------------|--------------|----------------------|------------|------------|
| A     | 18                 | 3394         | 15                   | .004419564 | .001244191 |
| B     | 25                 | 3922         | 11                   | .002804691 | .000867022 |

**Table 11: Major bleeding within 90-days among patients enrolled in CRISTAL: Estimate of Group Difference**

| Group Difference | Cross Over Estimate | Cross Over SE | Parallel Estimate | Parallel SE | Combined Estimate | Combined Standard Error | Lower 99.95% CI | Upper 99.95% CI |
|------------------|---------------------|---------------|-------------------|-------------|-------------------|-------------------------|-----------------|-----------------|
| A - B            | 0.002330            | 0.003464      | 0.001073          | 0.002455    | .001493261        | .002003180              | -.0050972       | .008083722      |

**Table 12: Further surgery (any recorded) among patients enrolled in CRISTAL : Observed Means**

| Group | Number of Clusters | N Procedures | N Further Surgery | Mean     | Std Error  |
|-------|--------------------|--------------|-------------------|----------|------------|
| A     | 18                 | 3394         | 76                | 0.022392 | .003028544 |
| B     | 25                 | 3922         | 81                | 0.020653 | .003108415 |

**Table 13: Further surgery (any recorded) among patients enrolled in CRISTAL : Estimate of Group Difference**

| Group Difference | Cross Over Estimate | Cross Over SE | Parallel Estimate | Parallel SE | Combined Estimate | Combined Standard Error | Lower 99.95% CI | Upper 99.95% CI |
|------------------|---------------------|---------------|-------------------|-------------|-------------------|-------------------------|-----------------|-----------------|
| A - B            | 0.004835            | 0.007575      | -0.01372          | 0.007680    | -.004315893       | .005393175              | -0.022059       | 0.013428        |

**Table 14: Readmission to hospital (any recorded) among patients enrolled in CRISTAL : Observed Means**

| Group | Number of Clusters | N Procedures | N Readmission to Hospital | Mean     | Std Error  |
|-------|--------------------|--------------|---------------------------|----------|------------|
| A     | 18                 | 3394         | 81                        | 0.023866 | .003121787 |
| B     | 25                 | 3922         | 85                        | 0.021673 | .003198854 |

**Table 15: Readmission to hospital (any recorded) among patients enrolled in CRISTAL : Estimate of Group Difference**

| Group Difference | Cross Over Estimate | Cross Over SE | Parallel Estimate | Parallel SE | Combined Estimate | Combined Standard Error | Lower 99.95% CI | Upper 99.95% CI |
|------------------|---------------------|---------------|-------------------|-------------|-------------------|-------------------------|-----------------|-----------------|
| A - B            | 0.004616            | 0.008358      | -0.01354          | 0.007816    | -.005069116       | .005708836              | -0.023851       | 0.013713        |

**All Procedures Undertaken at CRISTAL Hospitals by Participating Surgeons**

**Table 16: Baseline Characteristics of all Procedures Undertaken at CRISTAL Hospitals by Participating Surgeons**

| Characteristic |                   | A~(n=7599)         | B~(n=9988)         |
|----------------|-------------------|--------------------|--------------------|
| Age            | n                 | 7599               | 9988               |
|                | mean (SD)         | 69.4 (11.2)        | 69.0 (11.4)        |
|                | median (min, max) | 70.0 (13.0, 104.0) | 69.0 (11.0, 108.0) |
|                | median (Q1, Q3)   | 70.0 (62.0, 77.0)  | 69.0 (62.0, 77.0)  |
| BMI            | n                 | 7172               | 9528               |
|                | mean (SD)         | 30.6 (6.7)         | 30.8 (6.7)         |
|                | median (min, max) | 29.9 (12.0, 82.4)  | 30.0 (10.6, 85.8)  |
|                | median (Q1, Q3)   | 29.9 (26.0, 34.3)  | 30.0 (26.2, 34.5)  |
| Sex            | Male              | 3305 (43%)         | 4312 (43%)         |
|                | Female            | 4294 (57%)         | 5676 (57%)         |
| ASA            | 1                 | 329 (4.3%)         | 438 (4.4%)         |
|                | 2                 | 3494 (46%)         | 4643 (47%)         |
|                | 3                 | 3437 (45%)         | 4484 (45%)         |
|                | 4                 | 329 (4.3%)         | 387 (3.9%)         |
|                | 5                 | 3 (0.0%)           | 3 (0.0%)           |
|                | Missing           | 7                  | 33                 |
| Approach*      | Anterior          | 240 (9.2%)         | 599 (18%)          |
|                | Lateral           | 443 (17%)          | 377 (11%)          |
|                | Posterior         | 1912 (74%)         | 2417 (71%)         |
|                | Missing           | 5                  | 5                  |

\*Approach applies only to THA procedures

## **eAppendix 4. Second Interim Analysis – Update on Patients With a Reported History of VTE**

### **CRISTAL - Interim Analysis Second Interim Analysis - Update 17 December 2020**

#### **Background:**

The primary objective of the study is to determine whether aspirin is non-inferior to low molecular weight heparin (LMWH) in the prevention of symptomatic venous thromboembolism (VTE) occurring within 90-days in patients undergoing primary elective total hip arthroplasty (THA) or total knee arthroplasty (TKA) for osteoarthritis (OA). CRISTAL has been designed as a pragmatic, non-inferiority, cluster randomised crossover trial. Thirty-one hospitals across Australia are participating.

This interim analysis includes procedures up to and including 31 July 2020, giving 90-days follow-up to 31 October 2020. As of 31/7/2020, there were 12 hospitals that have crossed over to the second treatment arm. Of these, nine hospitals are in the 'AB' sequence and three are in the 'BA' sequence.

The following interim analysis was undertaken in response to a single death of one participant following a suspected VTE at one hospital. For the purposes of this interim analysis, the treatments were labelled A and B to preserve blinding. All analyses were performed for primary THA and TKA for OA.

The outcomes considered for analysis are:

- VTE occurring within 90-days among patients enrolled in CRISTAL
- VTE occurring within 90 days among patients enrolled in CRISTAL with a patient reported history of VTE
- VTE occurring within 90 days among patients enrolled in CRISTAL with no patient reported history of VTE
- Death within 90 days among patients enrolled in CRISTAL
- Death within 90 days among patients enrolled in CRISTAL with a patient reported history of VTE
- Death within 90 days among patients enrolled in CRISTAL with no patient reported history of VTE

Note that for the outcome of further surgery, no date of surgery is recorded, and this question is asked at both three- and six-months post operation. Therefore, this outcome is reporting any recorded and validated further surgery. The outcome of readmission to hospital is a combined outcome incorporating both further surgery

and readmission to hospital due to bleeding. This outcome is also reporting any recorded readmission to hospital, regardless of time since operation.

### **Method of Analysis:**

For each outcome, a summary proportion for each cluster was determined. For those hospitals that have crossed over, a linear regression of treatment differences on treatment sequence, weighted for cluster size, was performed as per Turner et. al. (2007). For those hospitals that have not crossed over, a linear regression was performed using the summary proportions. Results from the two models were combined using inverse variance weights and group differences (A -B) were calculated (Andrew Forbes, private communication, 25/8/2020). A significance level of 0.1% was chosen. Confidence Intervals presented are based on the Haybittle-Peto boundary.

### **Reference**

Turner RM, White IR, Croudace, T. 2007. Analysis of cluster randomized cross-over trial data: A comparison of methods. *Statistics in Medicine*. 26: 274-289

Note: there are 538 patients for whom history of VTE data is missing

Table 1: VTE occurring within 90-days among patients enrolled in CRISTAL by Patient Reported History of VTE

|                 |                | VTE within 90 days |     |
|-----------------|----------------|--------------------|-----|
|                 |                | 0                  | 1   |
|                 |                | N                  | N   |
| Treatment Group | History of VTE |                    |     |
| A               | .              | 213                | 2   |
|                 | 0              | 2929               | 42  |
|                 | 1              | 205                | 3   |
| B               | .              | 319                | 4   |
|                 | 0              | 3296               | 100 |
|                 | 1              | 186                | 17  |

Table 2: Death within 90 days among patients enrolled in CRISTAL by Patient Reported History of VTE

|                 |                | Died within 90 days |   |
|-----------------|----------------|---------------------|---|
|                 |                | 0                   | 1 |
|                 |                | N                   | N |
| Treatment Group | History of VTE |                     |   |
| A               | .              | 214                 | 1 |
|                 | 0              | 2969                | 2 |
|                 | 1              | 208                 | . |
| B               | .              | 323                 | . |
|                 | 0              | 3393                | 3 |
|                 | 1              | 202                 | 1 |

**Table 1: VTE occurring within 90-days among patients enrolled in CRISTAL: Observed Means**

| Group | Number of Clusters | N Procedures | N 90-day VTE | Mean     | Std Error  |
|-------|--------------------|--------------|--------------|----------|------------|
| A     | 18                 | 3394         | 47           | 0.013848 | .001971349 |
| B     | 25                 | 3922         | 121          | 0.030852 | .004583925 |

**Table 2: VTE occurring within 90-days among patients enrolled in CRISTAL: Estimate of Group Difference**

| Group Difference | Cross Over Estimate | Cross Over SE | Parallel Estimate | Parallel SE | Combined Estimate | Combined Standard Error | Lower 99.99% CI | Upper 99.99% CI |
|------------------|---------------------|---------------|-------------------|-------------|-------------------|-------------------------|-----------------|-----------------|
| A - B            | -0.01892            | 0.006325      | -0.02239          | 0.01226     | -0.019652         | .005620773              | -0.038145       | -.001159889     |

**Table 3: VTE occurring within 90 days among patients enrolled in CRISTAL with a patient reported history of VTE: Observed Means**

| Group | Number of Clusters | N Procedures | N 90-day VTE | Mean     | Std Error |
|-------|--------------------|--------------|--------------|----------|-----------|
| A     | 18                 | 208          | 3            | 0.014423 | 0.006576  |
| B     | 25                 | 203          | 17           | 0.083744 | 0.015520  |

**Table 4: VTE occurring within 90 days among patients enrolled in CRISTAL with a patient reported history of VTE: Estimate of Group Difference**

| Group Difference | Cross Over Estimate | Cross Over SE | Parallel Estimate | Parallel SE | Combined Estimate | Combined Standard Error | Lower 99.95% CI | Upper 99.95% CI |
|------------------|---------------------|---------------|-------------------|-------------|-------------------|-------------------------|-----------------|-----------------|
| A - B            | -0.06853            | 0.03019       | -0.08791          | 0.03461     | -0.076904         | 0.022751                | -0.15175        | -.002053776     |

**Table 5: VTE occurring within 90 days among patients enrolled in CRISTAL with no patient reported history of VTE: Observed Means**

| Group | Number of Clusters | N Procedures | N 90 Day VTE | Mean     | Std Error  |
|-------|--------------------|--------------|--------------|----------|------------|
| A     | 18                 | 2971         | 42           | 0.014137 | .001936287 |
| B     | 25                 | 3396         | 100          | 0.029446 | .004836909 |

**Table 6: VTE occurring within 90 days among patients enrolled in CRISTAL with no patient reported history of VTE: Estimate of Group Difference**

| Group Difference | Cross Over Estimate | Cross Over SE | Parallel Estimate | Parallel SE | Combined Estimate | Combined Standard Error | Lower 99.95% CI | Upper 99.95% CI |
|------------------|---------------------|---------------|-------------------|-------------|-------------------|-------------------------|-----------------|-----------------|
| A - B            | -0.01510            | 0.007212      | -0.02128          | 0.01228     | -0.016683         | .006219203              | -0.037144       | .003778277      |

**Table 7: Death within 90 days among patients enrolled in CRISTAL: Observed Means**

| Group | Number of Clusters | N Procedures | N 90-day Mortality | Mean       | Std Error  |
|-------|--------------------|--------------|--------------------|------------|------------|
| A     | 18                 | 3394         | 3                  | .000883913 | .000424352 |
| B     | 25                 | 3922         | 4                  | .001019888 | .000406459 |

**Table 8: Death within 90 days among patients enrolled in CRISTAL: Estimate of Group Difference**

| Group Difference | Cross Over Estimate | Cross Over SE | Parallel Estimate | Parallel SE | Combined Estimate | Combined Standard Error | Lower 99.95% CI | Upper 99.95% CI |
|------------------|---------------------|---------------|-------------------|-------------|-------------------|-------------------------|-----------------|-----------------|
| A - B            | -0.00135            | 0.001250      | 0.000704          | 0.000967    | -.000064834       | .000764864              | -.002581236     | .002451567      |

**Table 9: Death within 90 days among patients enrolled in CRISTAL with a patient reported history of VTE: Observed Means**

| Group | Number of Clusters | N Procedures | N 90-day Mortality | Mean       | Std Error  |
|-------|--------------------|--------------|--------------------|------------|------------|
| A     | 18                 | 208          | .                  | 0          | 0          |
| B     | 25                 | 203          | 1                  | .004926108 | .004668506 |

Group differences not calculated due to there being only 1 death in total.

**Table 10: Death within 90 days among patients enrolled in CRISTAL with no patient reported history of VTE: Observed Means**

| Group | Number of Clusters | N Procedures | N 90 Day Mortality | Mean       | Std Error  |
|-------|--------------------|--------------|--------------------|------------|------------|
| A     | 18                 | 2971         | 2                  | .000673174 | .000417778 |
| B     | 25                 | 3396         | 3                  | .000883392 | .000390125 |

**Table 11: Death within 90 days among patients enrolled in CRISTAL with no patient reported history of VTE: Estimate of Group Difference**

| Group Difference | Cross Over Estimate | Cross Over SE | Parallel Estimate | Parallel SE | Combined Estimate | Combined Standard Error | Lower 99.95% CI | Upper 99.95% CI |
|------------------|---------------------|---------------|-------------------|-------------|-------------------|-------------------------|-----------------|-----------------|
| A - B            | -0.00127            | 0.000633      | 0.000737          | 0.001066    | -.00075059        | .000543934              | -.002540134     | .001038955      |



## **eAppendix 5. Minutes From Meeting to Unblind Investigators**

### **CRISTAL Writing Group Meeting 9<sup>th</sup> November 2020, Tuesday 1900 (AEST)**

#### **Minutes**

**Attendees:** Chair: Ian Harris (IH), Verinder Sidhu (VS), Stephen Graves (SEG), Nicole Pratt (NP), Kara Cashman (KC), Rachelle Buchbinder (RB), Sam Adie (SA), Durga Bastiras (DB)

#### **1. Introduction/Agenda**

Group was greeted and agenda items were announced.

Agenda

- a. Readiness for unblinding to be established
- b. Unblinding of results (if appropriate)
- c. Updating manuscript with unblinded results
- d. Any other changes to manuscript required for finalisation
- e. Decision on communicating results to other investigators

#### **2. Readiness for unblinding**

IH informed group that Lan Kelly (Statistician) will not be unblinded as she is currently working on the analyses for other populations. IH is happy for both KC and NP to be present in this meeting and to be unblinded to the results as they are not involved in the analyses. Group agreed.

IH informed group that all investigators had approved the blinded manuscript and asked members to raise any concerns prior to unblinding. No concerns were raised and therefore the group proceeded with unblinding.

#### **3. Unblinding of results**

Group was informed of the process where the allocations (GROUP A and B) were checked prior to unblinding:

- a. Read-only access to the original spreadsheet containing the allocation details for Group A and B used for the randomisation was provided to the following staff
  - CRISTAL Project Coordinator
  - AOANJRR SAHMRI Statistician
  - AOANJRR SAHMRI Project Manager
- b. Allocation details were checked by the three staff.
- c. Participating sites treatment allocation (first and second treatment arm) were also cross checked with this original spreadsheet.

Following these checks, all 3 staff confirmed that the allocation details listed in the original spreadsheet were correct. This spreadsheet was then shown to the writing group for unblinding, showing that Group A was low molecular weight heparin and Group B was aspirin.

#### **4. Updating manuscript following unblinding**

Details of Group A and B were labelled accordingly on the manuscript.

Group then discussed the conclusion and the following amendments were made on the manuscript.

### **Original Manuscript (version 3.2)**

In conclusion, we found that A was superior to B in the prevention of symptomatic venous thromboembolism within 90 days of primary total hip or knee arthroplasty by a clinically important margin, without a difference in secondary outcomes. This trial provides strong evidence for clinical practice guidelines for the future prevention of thromboembolic events following hip and knee arthroplasty.

### **Amended Manuscript (Version 4.1) – For Submission**

In conclusion, we found that A **low-molecular weight heparin** was superior to B **aspirin** in the prevention of symptomatic venous thromboembolism within 90 days of primary total hip or knee arthroplasty ~~by a clinically important margin, without a difference.~~ **There were no between-group differences** in secondary outcomes, **including complications.** This trial provides strong evidence for **the need to update** clinical practice guidelines **that recommend aspirin** for the ~~future~~ prevention of thromboembolic events following hip and knee arthroplasty.

The group agreed on the submission of the amended manuscript version 4.1 and minutes of this meeting will be submitted as a supplementary document.

## **5. Decision on communicating results to investigators**

The group agreed to distribute the final, unblinded manuscript to all Investigators at the time of submission. However, prior to distribution, IH will email all investigators emphasizing that the manuscript has not undergone external peer review (and therefore, that the final paper will likely be different to this version) and that results cannot be communicated until publication and lifting of any embargo on reporting of results. Surgeons are free to change practice if they wish, but they cannot use the results of the CRISTAL trial in any official capacity until they have been externally reviewed and published.

## **eAppendix 6. Audit Process for Inpatient Adherence**

### **Methods**

Inpatient adherence during the acute care period was monitored by an audit of all sites over the first 2 weeks after commencing patient enrolment. The aim was to audit the first 20 patients of each treatment group to determine if patients had been given the correct drug and dose, prescribed once daily, commencing within 24 hours of surgery and that all patients were supplied with a discharge prescription of the allocated study drug. Hospitals were considered adherent for each patient if all of these aspects were achieved.

Additional aspects of the audit assessed the number of missed doses, whether patients were contraindicated to receive the study drug, were given calf compressors, if mobilization was achieved by day 1 postoperatively and whether a tourniquet was used. These aspects were not required to be achieved in order for a patient to be considered adherent.

If hospitals had less than 80% of patients adherent after the initial audit, a repeat audit was performed after one month.

The audit was conducted by research assistants at each participating hospital for hospitals outside Sydney (New South Wales). For hospitals within Sydney, a researcher independent to each hospital performed the audit.

Data collection form used for audit:

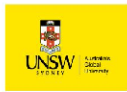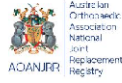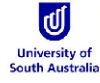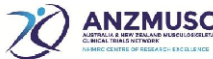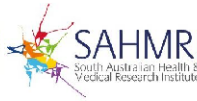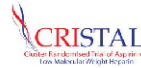

**CRISTAL IN-HOSPITAL COMPLIANCE AUDIT FORM**

|                              |                         |
|------------------------------|-------------------------|
| <b>Hospital:</b>             | <b>Patient surname:</b> |
| <b>Date of audit:</b>        | <b>Patient DOB:</b>     |
| <b>Drug: Aspirin Clexane</b> | <b>Age:</b>             |

| Joint                         | Tourniquet Use?                                | Calf compressors worn? | Hours between leaving OR and time of 1 <sup>st</sup> dose |
|-------------------------------|------------------------------------------------|------------------------|-----------------------------------------------------------|
| Hip Knee                      | Yes No NA (hip)                                | Yes No                 |                                                           |
| Correct Drug?                 | Contraindication to correct drug? * (describe) | Correct Dose? *        | Administered daily?                                       |
| Yes No                        |                                                | Yes No                 | Yes No                                                    |
| Mobilisation by end of day 1? | Length of Stay (days)                          | Missed Doses? (Number) | Discharge supply/script?                                  |
| Yes No                        |                                                |                        | Yes No                                                    |

- \*NB:**
1. Dose for aspirin – 85-150mg
  2. Dose for clexane – 40mg (20mg if Weight<50kg or Creatinine Clearance <30mL/min)
  3. Drug contraindicated if patient is on dual antiplatelet, warfarin, NOAC or has allergy/other reason

**Notes:**

### **Results of Inpatient Audit:**

For the first treatment group, all 31 hospitals provided patients who were audited for inpatient adherence. There were 10 hospitals that required a second audit (three aspirin and seven enoxaparin) and three hospitals that required a third audit (one aspirin and two enoxaparin). In total, there were 770 patients audited, who were eligible to receive the study drug for the first treatment group (404 aspirin patients and 366 enoxaparin patients). Of these, complete inpatient drug adherence was achieved in 669 patients (87%), 343 aspirin patients (85%) and 326 enoxaparin patients (89%).

For the second treatment group, 14 of 16 hospitals that crossed over prior to trial cessation provided patients who were audited. One hospital that was allocated to aspirin for this treatment group required a second audit. There were 235 patients audited who were eligible to receive the study drug for this treatment group (139 aspirin patients and 96 enoxaparin patients). Of these, complete inpatient drug adherence was achieved in 214 patients (91%), 124 aspirin patients (89%) and 90 enoxaparin patients (94%).

Data was collected on The compliance rate averaged 86% for patients in the first audit of the first arm and 90% for those in the first audit of the second arm. Thirteen hospitals required multiple audits for the first arm and one hospital for the second arm.

## **eAppendix 7. Audit Process for Post-discharge Adherence**

### **Methods**

This audit administered a telephone questionnaire after hospital discharge to a subset of patients enrolled in the CRISTAL study. Eligible patients for this audit included those who consented to participate in the CRISTAL trial undergoing total hip arthroplasty (THA) or total knee arthroplasty (TKA) for a diagnosis of osteoarthritis, who were eligible to receive either study drug. Patients who were excluded if they were on preoperative single antiplatelet therapy and if they had not been discharged from hospital (including inpatient rehabilitation) prior to the end of their prophylaxis period.

Eligible patients were selected from each participating hospital by trial co-ordinators at the AOANJRR, who were aware of the treatment allocation for each hospital and not involved in the statistical analysis for CRISTAL. Four consecutive patients were selected at the commencement of each treatment group. The aim was to select an equal number of patients from each arm of the study and 248 patients in total.

Prior to the commencement of the audit, a questionnaire was developed by seven trial investigators. The questions aimed to investigate adherence, the number of missed doses in each group and reasons underlying non-adherence to treatment. To minimise the effect of recall bias, the questionnaire was administered between 15-20 days after TKA and between 36-41 days after THA by the same person for all patients. The conversation was scripted to reduce the effect of interviewer bias.

The primary outcome of the audit was non-adherence, which was defined as any missed doses after discharge. The secondary outcome was the number of missed doses.

## Phone Questionnaire for Post-Discharge Adherence Audit

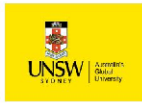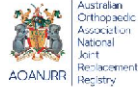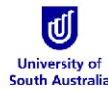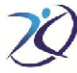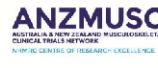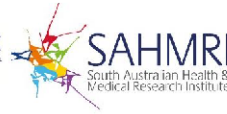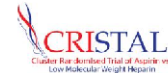

### **PHONE QUESTIONNAIRE POST DISCHARGE VTE PROPHYLAXIS COMPLIANCE**

**Patient Surname and DOB:**

**Type of Joint Replacement:**

**Type of Anticoagulant:**

Please note, standard script for each patient contacted is denoted by text in inverted commas (“ and”).

#### **Introduction**

“Good Morning (Patient Name), [REDACTED] calling from the Australian Orthopaedic Association National Joint Replacement Registry and the University of New South Wales regarding a trial you agreed to participate in – the CRISTAL trial.

Am I speaking with <<patient name>>? If **YES** → Continue

**If patient deceased and answered by relative** → “I am sorry to hear about your loss. You will not be contacted regarding this trial again and I will inform the Joint Registry team.”

In relation to this trial, we are conducting a telephone questionnaire to investigate if patients took their medication to prevent leg or lung clots following their joint replacement and to understand reasons why patients might not take this medication. The questionnaire will take approximately 10 minutes to complete. All data collected will be confidential and will be stored on the University of New South Wales secure RedCap database.”

#### **Consent to Participate:**

“Would you like to participate in this questionnaire? (Wait for response)

If you do not participate, it will not affect the care you will receive from your treating surgeon or hospital.”

**Yes** → Proceed to next paragraph (Timing of Questionnaire)

**No** → “Thank you for your time, you will not be contacted regarding this questionnaire any further. You will be contacted at 90 days after your surgery to complete the online questionnaire for the CRISTAL trial. Have a pleasant day.”

#### **Timing of Questionnaire:**

If Yes, “Would you have time to complete the questionnaire with me now?”

**Yes** → Proceed with Questionnaire on Page 2

**No** → “Can I call you at a more convenient time to complete the questionnaire?”

Record preferred time, thank patient for their time and re-contact patient at preferred later date.

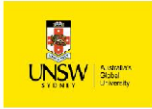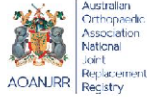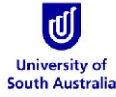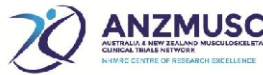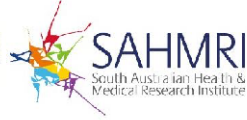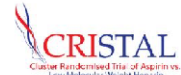

**QUESTIONNAIRE**

1. Did you take post-surgery blood thinning medication (to avoid blood clots) after leaving hospital following your joint replacement operation?

If **Yes**, proceed to Q2

If **No**:

a. What was the main reason for not taking medication to prevent clots in your legs or lung after leaving hospital?

---

---

2. How many days were you advised to take the blood thinning medication after you left hospital?

---

3. Did you miss any doses after discharge from hospital?

If **No**, questionnaire is complete

If **Yes or Unsure**, proceed to question 4

4. Did you stop taking the medication before the duration recommended to you?

If **No**, proceed to question 5

If **Yes**,

a. How many days before the recommended duration did you stop taking the medication?

---

b. What was the main reason you stopped taking the medication early?

---

---

c. While taking the medication, did you miss any doses?

---

---

5. How many doses did you miss while taking the medication?

---

---

a. What was the main reason for missing these doses?

---

---



## **Results of the Post-Discharge Adherence Audit**

Due to the early trial cessation, 178 patients out of the intended 248 were enrolled into this audit: 71 in the aspirin group and 107 in the enoxaparin group. Non-adherence in the aspirin group was 24% (17/71) and was 30% (32/107) in the enoxaparin group, a difference that was not significant (OR = 1.4, 95% CI 0.7 to 2.9, p=0.4).

The mean number of missed doses in the aspirin group was 2.5 (standard deviation = 6.9) and in the enoxaparin group was 3.4 (standard deviation = 7.4), a difference that was not significant (difference in means = 0.9, 95% CI -1.2 to 3.1, p=0.4).

The results of the inpatient and outpatient audits were combined and are provided in the manuscript.

## **eAppendix 8. Audit Process for “Absence” of VTE Audit**

### **Methods**

All positive VTE events recorded by patients at 90-day follow-up were verified through contacting treating physicians and surgeons.

To provide assurance that no VTE events were missed and whether patients were accurately reporting that they did not experience a VTE within 90 days, an “Absence of VTE” audit was conducted.

200 patients were selected randomly who recorded that they did not experience a VTE on the 90-day data collection form. To verify this result and to ensure there were no false negative events (i.e. patients who experienced a VTE, but reported that they had not), treating physicians, surgeons and general practitioners were contacted via telephone to ensure that these patients did not experience a VTE.

### **Results**

Of the 200 patients audited, there was 1 patient who had a false negative event and who had experienced a VTE, yet had reported they did not on the 90-day data collection form. The remaining 199 patients were verified as not having a VTE. The false negative rate found was therefore 1/200 (0.5%).

**eFigure. Non-inferiority Diagram for Primary Outcome**

Between group change for the primary outcome and non-inferiority margin. The dotted line represents the non-inferiority margin.

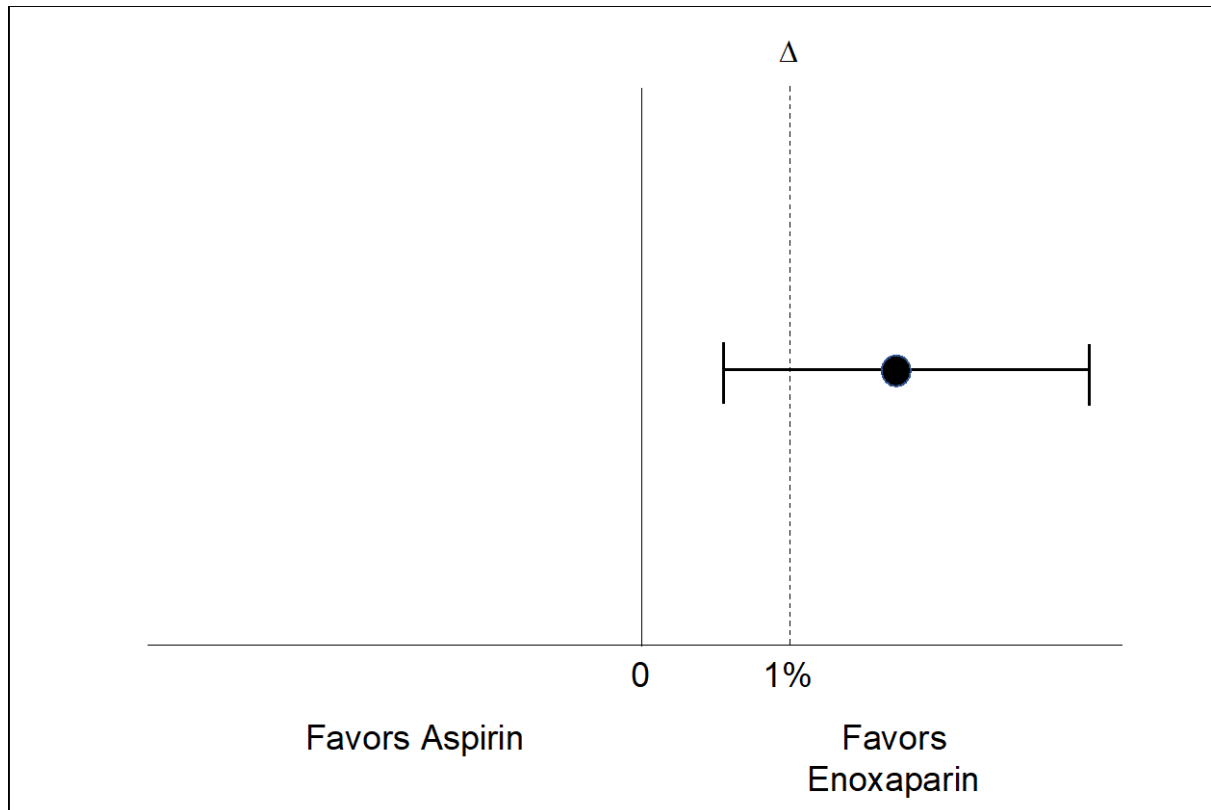

**eTable 1. Baseline Features of Participating Clusters**

Number of enrolled patients and enrolment rate by treatment allocation for patients undergoing primary total hip or knee arthroplasty for a diagnosis of osteoarthritis, for each participating hospital

| Hospital      | Number of HA and KA procedures performed (2018) | Insurance status <sup>a</sup>       | Initial treatment allocation            | Crossover achieved         | Aspirin     | Aspirin Enrolment Rate | Enoxaparin  | Enoxaparin Enrolment Rate | Overall enrolment rate (combined for both groups) |
|---------------|-------------------------------------------------|-------------------------------------|-----------------------------------------|----------------------------|-------------|------------------------|-------------|---------------------------|---------------------------------------------------|
| 1             | 277                                             | PUBLIC                              | Enoxaparin                              | No                         |             |                        | 290         | 91.9%                     | 91.9%                                             |
| 2             | 768                                             | PUBLIC                              | Enoxaparin                              | Yes                        | 192         | 75.7%                  | 266         | 71.1%                     | 72.9%                                             |
| 3             | 655                                             | PUBLIC                              | Aspirin                                 | Yes                        | 237         | 53.4%                  | 152         | 44.7%                     | 49.8%                                             |
| 4             | 580                                             | PUBLIC                              | Aspirin                                 | Yes                        | 184         | 61.9%                  | 182         | 90.9%                     | 73.3%                                             |
| 5             | 337                                             | PUBLIC                              | Aspirin                                 | No                         | 243         | 79.8%                  |             |                           | 79.8%                                             |
| 6             | 1,009                                           | PUBLIC                              | Enoxaparin                              | Yes                        | 383         | 73.4%                  | 269         | 57.6%                     | 65.9%                                             |
| 7             | 500                                             | PUBLIC                              | Aspirin                                 | Yes                        | 251         | 68.7%                  | 33          | 60.3%                     | 67.6%                                             |
| 8             | 448                                             | PRIVATE                             | Aspirin                                 | Yes                        | 318         | 59.0%                  | 54          | 78.7%                     | 61.1%                                             |
| 9             | 568                                             | PUBLIC                              | Aspirin                                 | No                         | 102         | 24.9%                  |             |                           | 24.9%                                             |
| 10            | 542                                             | PUBLIC                              | Enoxaparin                              | No                         |             |                        | 292         | 70.0%                     | 70.0%                                             |
| 11            | 1,617                                           | PRIVATE                             | Enoxaparin                              | Yes                        | 292         | 56.3%                  | 246         | 56.6%                     | 56.4%                                             |
| 12            | 620                                             | PUBLIC                              | Enoxaparin                              | Yes                        | 137         | 81.4%                  | 257         | 77.7%                     | 79.0%                                             |
| 13            | 849                                             | PRIVATE                             | Enoxaparin                              | Yes                        | 226         | 56.1%                  | 263         | 49.3%                     | 52.1%                                             |
| 14            | 606                                             | PUBLIC                              | Aspirin                                 | Yes                        | 225         | 69.6%                  | 104         | 65.7%                     | 68.4%                                             |
| 15            | 559                                             | PUBLIC                              | Enoxaparin                              | Yes                        | 311         | 90.7%                  | 239         | 75.5%                     | 83.9%                                             |
| 16            | 313                                             | PUBLIC                              | Enoxaparin                              | No                         |             |                        | 74          | 33.7%                     | 33.7%                                             |
| 17            | 275                                             | PUBLIC                              | Enoxaparin                              | No                         |             |                        | 148         | 82.1%                     | 82.1%                                             |
| 18            | 580                                             | PUBLIC                              | Aspirin                                 | No                         | 139         | 59.8%                  |             |                           | 59.8%                                             |
| 19            | 295                                             | PUBLIC                              | Aspirin                                 | No                         | 203         | 62.0%                  |             |                           | 62.0%                                             |
| 20            | 1,056                                           | PRIVATE                             | Enoxaparin                              | Yes                        | 338         | 36.1%                  | 277         | 60.5%                     | 43.9%                                             |
| 21            | 310                                             | PUBLIC                              | Enoxaparin                              | Yes                        | 20          | 66.7%                  | 56          | 53.6%                     | 56.1%                                             |
| 22            | 250                                             | PUBLIC                              | Aspirin                                 | No                         | 206         | 67.4%                  |             |                           | 67.4%                                             |
| 23            | 532                                             | PUBLIC                              | Aspirin                                 | No                         | 146         | 34.3%                  |             |                           | 34.3%                                             |
| 24            | 852                                             | PRIVATE                             | Enoxaparin                              | Yes                        | 32          | 62.9%                  | 296         | 65.4%                     | 65.1%                                             |
| 25            | 340                                             | PUBLIC                              | Aspirin                                 | No                         | 177         | 73.7%                  |             |                           | 73.7%                                             |
| 26            | 1,170                                           | PRIVATE                             | Enoxaparin                              | Yes                        | 186         | 78.8%                  | 249         | 78.8%                     | 78.8%                                             |
| 27            | 585                                             | PRIVATE                             | Aspirin                                 | No                         | 285         | 49.4%                  |             |                           | 49.4%                                             |
| 28            | 1,062                                           | PRIVATE                             | Enoxaparin                              | Yes                        | 331         | 86.7%                  | 289         | 85.5%                     | 86.2%                                             |
| 29            | 255                                             | PRIVATE                             | Aspirin                                 | No                         | 127         | 58.3%                  |             |                           | 58.3%                                             |
| 30            | 688                                             | PRIVATE                             | Aspirin                                 | No                         | 243         | 71.0%                  |             |                           | 71.0%                                             |
| 31            | 761                                             | PUBLIC                              | Aspirin                                 | No                         | 141         | 35.3%                  |             |                           | 35.3%                                             |
| <b>Totals</b> | <b>19259</b>                                    | <b>Private – 10<br/>Public – 21</b> | <b>15 – enoxaparin<br/>16 – aspirin</b> | <b>16 Crossed<br/>Over</b> | <b>5675</b> | <b>Median<br/>60%</b>  | <b>4036</b> | <b>66%<br/>(median)</b>   | <b>66.0% (median)</b>                             |

<sup>a</sup>Private hospitals are owned by private corporations and patients are funded by private health insurance companies. Medicare hospitals are funded by the Australian and State Governments

**eTable 2. Comparison of Enrolled and Non-enrolled Patients**

Comparative demographic information of enrolled patients and non-enrolled patients undergoing primary total hip or knee arthroplasty for a diagnosis of osteoarthritis, by treatment allocation at participating hospitals

|                          | Enrolled<br>(n = 10965) |                     | Not Enrolled<br>(n = 6650) |                     |
|--------------------------|-------------------------|---------------------|----------------------------|---------------------|
|                          | Enoxaparin<br>(N=4534)  | Aspirin<br>(N=6420) | Enoxaparin<br>(N=2319)     | Aspirin<br>(N=4331) |
| <b>Age</b>               |                         |                     |                            |                     |
| N                        | 4537                    | 6428                | 2319                       | 4331                |
| Median (Q1, Q3)          | 69.0 (62.0, 75.0)       | 68.0 (61.0, 74.0)   | 70.0 (63.0, 76.0)          | 69.0 (62.0, 76.0)   |
| <b>BMI</b>               |                         |                     |                            |                     |
| N                        | 4506                    | 6360                | 2291                       | 4286                |
| Median (Q1, Q3)          | 30.6 (27.0, 34.9)       | 30.7 (27.0, 35.2)   | 30.5 (26.9, 35.2)          | 30.7 (26.8, 35.0)   |
| <b>Sex</b>               |                         |                     |                            |                     |
| N                        | 4537                    | 6428                | 2319                       | 4331                |
| Female                   | 2559 (56.4%)            | 3579 (55.7%)        | 1338 (57.7%)               | 2490 (57.5%)        |
| Male                     | 1978 (43.6%)            | 2849 (44.3%)        | 981 (42.3%)                | 1841 (42.5%)        |
| <b>ASA Grading</b>       |                         |                     |                            |                     |
| N                        | 4534                    | 6405                | 2318                       | 4322                |
| 1                        | 204 (4.5%)              | 320 (5.0%)          | 97 (4.2%)                  | 186 (4.3%)          |
| 2                        | 2375 (52.4%)            | 3425 (53.5%)        | 1139 (49.1%)               | 2133 (49.4%)        |
| 3                        | 1916 (42.3%)            | 2586 (40.4%)        | 1048 (45.2%)               | 1943 (45.0%)        |
| 4                        | 39 (0.9%)               | 74 (1.2%)           | 33 (1.4%)                  | 60 (1.4%)           |
| 5                        | 0 (0.0%)                | 0 (0.0%)            | 1 (0.0%)                   | 0 (0.0%)            |
| <b>Joint replacement</b> |                         |                     |                            |                     |
| N                        | 4537                    | 6428                | 2319                       | 4331                |
| THA                      | 1719 (37.9%)            | 2409 (37.5%)        | 856 (36.9%)                | 1764 (40.7%)        |
| TKA                      | 2818 (62.1%)            | 4019 (62.5%)        | 1463 (63.1%)               | 2567 (59.3%)        |

**eTable 3. Sensitivity Analyses**

Sensitivity analyses for the primary outcome, symptomatic venous thromboembolism within 90 days

|                                 | Aspirin<br>n (%) | Enoxaparin<br>n (%) | Estimated<br>Absolute Risk<br>Difference (%) | 95% Confidence<br>Interval (%) | p-value | Interaction<br>p-value |
|---------------------------------|------------------|---------------------|----------------------------------------------|--------------------------------|---------|------------------------|
| Volume                          |                  |                     |                                              |                                |         |                        |
| ≥ 820 procedures (n = 6715)     | 135/3752 (3.60)  | 59/2963 (1.99)      | -1.61                                        | -2.99 to -0.23                 | 0.02    | 0.83                   |
| < 820 procedures (n = 2488)     | 52/1664 (3.12)   | 10/824 (1.21)       | -1.91                                        | -4.27 to 0.43                  | 0.11    |                        |
| Enrolment rate                  |                  |                     |                                              |                                |         |                        |
| ≥ 66% (n = 5394)                | 106/2924 (3.63)  | 44/2470 (1.78)      | -2.39                                        | -4.23 to -0.54                 | 0.01    | 0.81                   |
| < 66% (n = 3809)                | 81/2492 (3.25)   | 25/1317 (1.90)      | -2.00                                        | -4.60 to 0.06                  | 0.13    |                        |
| Multiple (≥2) compliance audits |                  |                     |                                              |                                |         |                        |
| Yes (n = 2433)                  | 44/1219 (3.61)   | 26/1214 (2.14)      | -1.63                                        | -4.27 to 1.01                  | 0.20    | 0.78                   |
| No (n = 6760)                   | 143/4197 (3.41)  | 43/2573 (1.67)      | -2.11                                        | -4.15 to -0.07                 | 0.04    |                        |

**eTable 4. Comparison of Complete Case and Imputed Analyses for Primary Outcome**

| <b>N</b> | <b>Observed,<br/>Aspirin</b> | <b>Observed,<br/>Enoxaparin</b> | <b>Outcome</b>                   | <b>Estimated Difference<br/>%, (95 % CI)</b> | <b>Non-<br/>inferiority<br/>p-value</b> | <b>Superiority<br/>p-value</b> |
|----------|------------------------------|---------------------------------|----------------------------------|----------------------------------------------|-----------------------------------------|--------------------------------|
| 9,203    | 187/5416<br>(3.45%)          | 69/3787 (1.82%)                 | Complete Case                    | -1.97 (-3.41 to -0.54)                       | 0.91                                    | 0.007                          |
| 9,706    |                              |                                 | Imputed (excluding<br>deaths)    | -1.88 (-3.31 to -0.46)                       | 0.89                                    | 0.01                           |
| 9,711    |                              |                                 | Imputed (including<br>deaths)    | -1.87 (-3.28 to -0.45)                       | 0.89                                    | 0.01                           |
| 9,711    |                              |                                 | Inverse probability<br>weighting | -1.97 (-3.40 to -0.54)                       | 0.91                                    | 0.007                          |

**eTable 5. Comparison of Complete Case and Imputed Analyses for Secondary Outcomes**

| <b>Outcome</b>             | <b>Observed, Aspirin</b> | <b>Observed, Enoxaparin</b> | <b>Estimated Difference Aspirin-Enoxaparin, (95 % CI)</b> | <b>p-value</b> | <b>Imputed Difference Aspirin-Enoxaparin, (95 % CI)</b> | <b>Imputed p-value</b> |
|----------------------------|--------------------------|-----------------------------|-----------------------------------------------------------|----------------|---------------------------------------------------------|------------------------|
| PE at 90 days              | 58/5416 (1.07%)          | 21/3787 (0.55%)             | -0.44 (-1.08 to 0.19)                                     | 0.17           | -0.41 (-1.07 to 0.25)                                   | 0.22                   |
| DVT at 90 days             | 140/5416 (2.58%)         | 50/3787 (1.32%)             | -1.61 (-2.68 to -0.54)                                    | 0.003          | -1.53 (-2.61 to -0.45)                                  | 0.005                  |
| DVT above knee at 90 days  | 12/5415 (0.22%)          | 6/3787 (0.16%)              | -0.06 (-0.23 to 0.11)                                     | 0.49           | -0.06 (-0.24 to 0.13)                                   | 0.55                   |
| DVT below knee at 90 days  | 129/5415 (2.38%)         | 45/3787 (1.19%)             | -1.49 (-2.50 to -0.48)                                    | 0.004          | -1.43 (-2.42 to -0.43)                                  | 0.005                  |
| Both PE and DVT at 90 days | 11/5416 (0.2%)           | 2/3787 (0.05%)              | -0.1 (-0.30 to 0.10)                                      | 0.32           | -0.07 (-0.36 to 0.22)                                   | 0.65                   |
| Bleeding at 90 days        | 17/5401 (0.31%)          | 15/3779 (0.4%)              | 0.05 (-0.25 to 0.35)                                      | 0.75           | 0.08 (-0.30 to 0.46)                                    | 0.68                   |
| Death at 90 days           | 4/5675 (0.07%)           | 2/4036 (0.05%)              | -0.05 (-0.15 to 0.05)                                     | 0.36           |                                                         |                        |
| Readmission at 90 days     | 130/5403 (2.41%)         | 85/3782 (2.25%)             | -0.60 (-1.39 to 0.19)                                     | 0.13           | -0.55 (-1.40 to 0.30)                                   | 0.21                   |
| Re-operation at 90 days    | 116/5412 (2.14%)         | 73/3787 (1.93%)             | -0.67 (-1.46 to 0.12)                                     | 0.01           | -0.63 (-1.46 to 0.21)                                   | 0.14                   |
| Re-operation at 6 months   | 175/5086 (3.44%)         | 120/3535 (3.39%)            | -0.16 (-1.14 to 0.82)                                     | 0.75           | -0.12 (-1.17 to 0.94)                                   | 0.83                   |



**eTable 6. Comparison of Complete Case and Imputed Analyses for Subgroup Analyses**

| Subgroup       | Category | Observed, Aspirin | Observed, Enoxaparin | Estimated Difference Aspirin-Enoxaparin, (95 % CI) | Superiority p-value | Interaction p-value | Imputed Difference Aspirin-Enoxaparin, (95 % CI) | Imputed superiority p-value | Imputed interaction p-value |
|----------------|----------|-------------------|----------------------|----------------------------------------------------|---------------------|---------------------|--------------------------------------------------|-----------------------------|-----------------------------|
| Joint          | Hip      | 42/2068 (2.03%)   | 7/1430 (0.49%)       | -1.94 (-3.93 to 0.04)                              | 0.06                | 0.92                | -1.82 (-3.8 to 0.16)                             | 0.072                       | 0.89                        |
|                | Knee     | 145/3348 (4.33%)  | 62/2357 (2.63%)      | -2.07 (-3.50 to -0.63)                             | 0.005               |                     | -1.99 (-3.45 to -0.54)                           | 0.0073                      |                             |
| History of VTE | Yes      | 23/270 (8.52%)    | 6/228 (2.63%)        | -6.00 (-11.53 to -0.45)                            | 0.03                | 0.14                | -5.97 (-11.55 to -0.40)                          | 0.036                       | 0.14                        |
|                | No       | 155/4826 (3.21%)  | 60/3379 (1.78%)      | -1.71 (-3.03 to -0.39)                             | 0.01                |                     | -1.65 (-2.98 to -0.32)                           | 0.015                       |                             |
| Bilateral      | Yes      | 26/614 (4.23%)    | 13/409 (3.18%)       | -2.04 (-5.64 to 1.56)                              | 0.27                | 0.99                | -1.93 (-5.56 to 1.69)                            | 0.3                         | 1.0                         |
|                | No       | 161/4802 (3.35%)  | 56/3378 (1.66%)      | -2.01 (-3.38 to -0.64)                             | 0.004               |                     | -1.93 (-3.32 to -0.55)                           | 0.0062                      |                             |
| Anticoagulants | Yes      | 47/1031 (4.56%)   | 21/725 (2.9%)        | -1.88 (-3.30 to -0.45)                             | 0.08                | 0.69                | -2.39 (-5.11 to 0.33)                            | 0.085                       | 0.68                        |
|                | No       | 132/4070 (3.24%)  | 45/2882 (1.56%)      | -2.51 (-5.29 to 0.27)                              | 0.01                |                     | -1.74 (-3.13 to -0.36)                           | 0.014                       |                             |
