# Supplementary material
Source: PubMed Central journal article supplement (PMC9399863)
Supplement: jama-e2213416-s004.pdf [file jama-e2213416-s004.pdf]

CRISTAL Study Group. Effect of aspirin vs enoxaparin on symptomatic venous thromboembolism in patients undergoing hip or knee arthroplasty: the CRISTAL randomized trial. *JAMA*. Published August 23, 2022. doi:10.1001/jama.2022.13416

## Data Sharing Statement

### Data

**Data available:** Yes

**Data types:** Deidentified participant data

**How to access data:** Data will be available upon reasonable request from the senior author, Prof Ian Harris, via email [ianharris@unsw.edu.au](mailto:ianharris@unsw.edu.au)

**When available:** With publication

### Supporting Documents

**Document types:** None

### Additional Information

**Who can access the data:** De-identified data will be made available to researchers whose proposed use of the data has been approved by the governing human research ethics committee.

**Types of analyses:** Data must be used for non-commercial, research purposes only.

**Mechanisms of data availability:** Data will be made available with investigator support subject to approval by the governing human research ethics committee.

**Any additional restrictions:** Any future analyses using study data must include at least one senior investigator from the original study to provide context and ensure correct use and appropriate interpretation of the data.
